# Supplementary material for: Historical Immigration Policies: Trends and Lessons
Source: Oxford University Press journal article supplement (doi:10.1093/isq/sqae084), 2024-06-24
Supplement: sqae084_supplemental_file.pdf [file sqae084_supplemental_file.pdf]

## HISTORICAL IMMIGRATION POLICIES: TRENDS AND LESSONS

### APPENDIX A: DIMENSIONS AND THEIR CODING

Here we list all twelve dimensions in more detail. We list the questions that lead a law or part of a law to be coded in each dimension. If any of those questions were answered “yes,” the law (or section of the law) was coded in that category. If all questions were answered “no,” the law was not coded in that category.

**Nationality Restrictions.** Regulations based on nationality tend to take one of two forms: prohibitions based on nationality or special access based on nationality. With prohibitions, states often grant entry to immigrants from all states except those prohibited; with special access, states often prohibit or limit entry of immigrants from all states except those granted special access. Examples of prohibitions based on nationality include the Chinese Exclusion Act in the US and laws against Polish immigration in Germany in the late nineteenth century. Examples of special access include the free migration areas (FMAs) in which migrants from within the area are granted free or preferred access whereas those from outside of the area are restricted.

Where special access ends and prohibition begins can be hard to gauge; therefore, these criteria are operationalized by examining how many nationalities can enter a state. If only a few or no nationalities are restricted, the state is relatively open on this measure; if many or most nationalities are restricted, the state is relatively closed on this measure.

*Coding Criteria for the Nationality Category.* Does the law pertain to specific nationalities? Are exclusions based on national origin? Did the state sign a bilateral labor migration treaty or another international agreement on immigration?

**1:** Only descendent of natives allowed in.

- 2: A few nationalities allowed entrance but not many. Example: if a European country allowed immigrants from other EU countries only.
- 3: Many nationalities allowed in but not all or migrants from some regions excluded. Example: Between 1924 and 1965, the US quota system allowed in many Northern Europeans, some Southern and Eastern Europeans, anyone from the Western Hemisphere, and no one from Asia.
- 4: Almost all nationalities allowed in. Example: In the late nineteenth century, only Chinese were excluded from the US. Additionally, numerical limits by country but applied equally by country. Example: Current US law restricts migration from each country to 20,000.
- 5: No exclusions based on nationality

*Example of Coding for the Nationality Category.* Table A1 shows examples of how nationality restrictions were coded for the US. The table lists the nationality component of the major changes in US law, but does not include all of the changes in immigration policy.

**Skill Restrictions.** Another frequently used criterion for regulating low-skill immigration has been to directly use skill or wealth requirements. States often enact special programs for high-skill workers at the same time that they restrict low-skill migration, either within the same regulations as in point systems or as part of omnibus legislation. For coding purposes, what matters is whether these programs are used in place of openness for low-skill workers. If the establishment of these programs does not affect the immigration of low-skill workers, then they are not coded as restrictions.

*Coding Criteria for the Skill Category.* Does the law restrict by the skills or income an immigrant possesses? Does it use a point system with points given for education or special skills? Are people excluded based on profession (i.e., no prostitutes), illness (e.g., no epileptics), or likelihood of becoming a public charge?

TABLE A1. Examples of Coding of US Nationality and Skill Restrictions

| Year | Nationality                                                                                                |        | Skill                                                                                                                  |        |
|------|------------------------------------------------------------------------------------------------------------|--------|------------------------------------------------------------------------------------------------------------------------|--------|
|      | Restrictions                                                                                               | Coding | Restrictions                                                                                                           | Coding |
| 1790 | No restrictions                                                                                            | 5      | No restrictions                                                                                                        | 5      |
| 1819 | No change                                                                                                  | 5      | Safety restrictions on boats increase cost of passage                                                                  | 4.85   |
| 1862 | No change                                                                                                  | 5      | Ban on indentured labor                                                                                                | 4.5    |
| 1870 | Restrictions on the entry of Chinese women                                                                 | 4.5    | No change                                                                                                              | 4.5    |
| 1875 | No change                                                                                                  | 4.5    | Creation of excludable classes                                                                                         | 4.25   |
| 1882 | Chinese Exclusion Act                                                                                      | 4      | Additional excludable classes, including those likely to become a public charge                                        | 4      |
| 1917 | No change                                                                                                  | 3.5    | Literacy Act                                                                                                           | 2.75   |
| 1921 | First national origins quota based on the 1910 census                                                      | 3      | Preference system based on skill<br>Repeal Literacy Act                                                                | 3.5    |
| 1924 | Second national origins quota based on the 1890 census                                                     | 2.75   | Preference system based on skill                                                                                       | 3.5    |
| 1952 | McCarren-Walther Act: national origin quota based on 1920 Census person quota allocated to Asian Countries | 3.5    | Revision of preference system to put greater emphasis on skill                                                         | 3.4    |
| 1965 | Abolishment of discriminatory quotas; all states from Eastern Hemisphere given the same cap                | 5      | Established preference scheme based on family reunification and skill; no country cap for Western Hemisphere countries | 4      |
| 1976 | No change                                                                                                  | 5      | Applied the 20,000 per-country limit to the Western Hemisphere                                                         | 4      |
| 1986 | No change                                                                                                  | 5      | Creation of Seasonal Agricultural Workers program; creation of diversity visas                                         | 4.25   |

A score of 5 on this scale indicates that the country has no restrictions by skill or wealth and a score of 1 means only the very highest-skilled/highest-wage workers (executives, high-level intracompany transfers) are allowed in. When states exempt one group from these restrictions—either by nationality in the case of the New Zealand seasonal workers program for Polynesians or by a general category like the seasonal agricultural workers program in Britain—the score increases.

- 1:** Only highly educated, high-income earners allowed in; many excludable classes.
- 2:** Mostly high educated, high earners, but some allowances for low-skilled workers; some excludable classes.

- 3: Preference for high-skill workers but many opportunities for low-skilled workers; some excludable classes.
- 4: Few slots reserved for high-skill/high-income workers (i.e., like the H1B visa in the US); most visas open for anyone; few excludable classes (e.g., only criminals or those likely to become a public charge).
- 5: No skill restrictions for any visas; no excludable classes.

*Example of Coding for the Skill Category.* Table A1 gives examples of how the skill criterion is coded for the US. As a contrast to the US, Table A2 shows how Canada has used nationality and skill criteria to affect who can enter the state.

**Quotas.** Numeric quotas are another tool that states have used to regulate the flow of either all immigrants or specifically low-skill immigrants; however, this tool is used infrequently (in 8.4 percent of the country-years). Typically, the quota is allocated by some type of preference ordering. The coding of quotas is based on what percentage of the population (total quota divided by population) the country is willing to allow in each year. Because most of these states rarely update their quotas, the measure can become more restrictive over time without a law change by the policy-maker. Nonetheless, this restrictiveness is built into quotas; as the population and economy grow, there would likely be a demand for more immigrant workers. Policy-makers can update the quotas to account for the increased demand but choose not to.

Due to changes in the population, the quotas measure is the only measure that can change without new legislation. Importantly, population growth can lead a quota to become more restrictive over time unless the government revises the quota. This coding, then, is similar to the way in which specific tariffs can be inflated away; if inflation increases the costs of all goods, a tariff that does not change becomes a smaller and smaller part of the good's price. Policy-makers can continue to use the same quota to make immigration, in effect, more restrictive without changing the policy, just as in the case of tariffs. For example, Congress last updated the US quota in 1990. Since that time US population has increased

TABLE A2. Examples of Coding of Canada's Nationality and Skill Restrictions

| Year | Restrictions                                                                                                                                                                                                                                                                                                                    | Nationality | Coding | Restrictions                                                                                                                                                                                                                                                                                                                                                                                          | Skill | Coding |
|------|---------------------------------------------------------------------------------------------------------------------------------------------------------------------------------------------------------------------------------------------------------------------------------------------------------------------------------|-------------|--------|-------------------------------------------------------------------------------------------------------------------------------------------------------------------------------------------------------------------------------------------------------------------------------------------------------------------------------------------------------------------------------------------------------|-------|--------|
| 1926 | Four-tiered immigration-admissions system: white British and Americans permitted relatively freely; immigrants from northern Europe could enter if they were sponsored by Canadian relatives, or had a needed occupation; Immigrants from Eastern and Southern Europe needed special permits, those from Asia/ Africa excluded. |             | 2.5    | Literacy test; large numbers of excluded classes                                                                                                                                                                                                                                                                                                                                                      |       | 3      |
| 1931 | Only (1) white British subjects and (2) US citizens admissible, others must be wife/children of LPRs or agriculturalists having sufficient means to farm.                                                                                                                                                                       |             | 1.5    | Agriculturalists with sufficient means allowed                                                                                                                                                                                                                                                                                                                                                        |       | 2      |
| 1948 | French Citizens are given the same status as British Subjects                                                                                                                                                                                                                                                                   |             | 2      | No change                                                                                                                                                                                                                                                                                                                                                                                             |       | 2.5    |
| 1962 | Removal of most racial discrimination,                                                                                                                                                                                                                                                                                          |             | 4      | Removes most of the racial discrimination except still allows Europeans to sponsor a wider range of relatives.<br>Independent immigration: a person who (i) by reason of his education, training, skills, or qualifications can establish himself successfully and (ii) has means to maintain himself until he is established, (iii) has employment or (iv) has the means to start a business or farm |       | 3.85   |
| 1967 | No more racial requirements                                                                                                                                                                                                                                                                                                     |             | 5      | Creation of a points system. Assigned points: -employment or designated occupation (0-10), -knowledge in English or French (0-10), -relative in Canada (0-5), -area of destination (0-5), -education and training (0-20), -personal qualities (0-15), -occupational demand (0-15), -occupational skill (1-10), -age (0-10).                                                                           |       | 3.15   |
| 2001 | No change                                                                                                                                                                                                                                                                                                                       |             | 5      | New point system: greater reward for education, language and experience. Also, there are 4 migrant worker programs. Skilled occupations, Seasonal Agricultural Worker, Live-In Caregiver Program, and the Temporary Foreign Worker Program to fill jobs that require a high-school diploma or less.                                                                                                   |       | 2.35   |

by about 80 million and the US economy has more than doubled in size in real terms, yet the quota has remained the same. Thus, by neglecting immigration policy, Congress has made it more restrictive.

*Coding Criteria for the Quota Category.* Is there a quota and how restrictive is it?

Quotas are coded only when the quota is a numerical limit on a large portion of immigrants, not when it is a target for the number of immigrants. Targets, like policy statements or

development plans, are not coded because they are not changes in legislation but usually administrative policies. The quota does not need to be binding on all immigrants. This is because it is rare to have a quota that binds on all immigrants. Usually at least wives and minor children of citizens are allowed in above the quota; this policy is denoted in the family immigration policy coding. Sometimes, the quota is only on one class of immigrants, such as the Hong Kong quota on Chinese immigrants, but this class makes up the majority of immigrants entering the country. Again, high-skill workers from other countries could enter above the quota, although wives and minor children of Hong Kong belongers (equivalent to citizens) cannot. This is denoted in the other categories.

- 1:** Less than 0.25% of population can enter annually
- 2:** 0.25-0.5% of population can enter annually
- 3:** 0.5-1% of the population can enter annually
- 4:** Over 1% of population can enter annually
- 5:** No quota

*Examples of Coding for the Quota Category.* The US has been one of the few states to use a quota as a major part of its immigration policy. The quota was first introduced in 1921; for 1921-23 the quota was set at 350,000 or about 0.32 percent of the population (coded as a 2). In 1924, the quota was lowered to 150,000 or about 0.13 percent of the population (coded as 1). Since then, the quota, in comparison to the US population, has been quite low, always less than 0.3 percent and often less than 0.25 percent of the population. In comparison, since 1978 Hong Kong has placed a quota on immigration from mainland China, but this quota has been much larger proportionately. For much of its history, mainland Chinese have been the major immigrant group to Hong Kong; a quota on them, then, limits the majority of immigration to Hong Kong. In 1978, the quota was for 113,150 mainland Chinese residents or about 2.4 percent of Hong Kong's population at the time. In 1989, Hong Kong added a quota for all foreign workers as well as immigrants from mainland China. Since then, most years the quota has allowed in slightly more than 1 percent of the population.

**Recruitment.** States have at times gone out to recruit immigrants as a way to increase the number of immigrants coming to their country. In this case, the policy-maker has decided that the “natural rate” of immigration is too low and wants to increase it. Governments have sometimes paid to recruit immigrants through their own budget and at other times have allowed employers to pay to recruit immigrants. States that fund recruitment out of their own budget are given the highest score, states that allow employers to recruit are given scores between 2 and 4 depending on how easy it is for firms to recruit, and states that do not allow recruitment are given the lowest score.

*Coding Criterial for the Recruitment Category.* Are there special visas or procedures to recruit labor or settlers? To recruit workers, do employers have to advertise first or otherwise seek approval from a government ministry? Can all industries recruit? Do firms have to pay levies or other taxes for foreign workers? Does the government pay for passage or give settlers or workers other benefits to induce them to come? A score of 1 denotes that all workers have to follow the same requirements as all other immigrants and that firms cannot recruit from overseas. An example of this is the US Contract Labor Law. A 5 denotes that the government will pay for passage of any immigrant and will give the immigrant money, land, or other goods to help him to settle.

- 1:** No special procedure or visa, come in under the same system of regulation as everyone else; labor recruitment prohibited.
- 2:** Small set of visas for special groups of workers (i.e., agricultural workers); trigger to reduce numbers based on employment data; employers are not allowed to pay for moving expenses; many restrictions including no unemployed natives in the industry.
- 3:** Moderate number of visas for all groups or many groups obtain visas; employers allowed to pay for moving expenses; some procedures for recruiting workers.
- 4:** Few or no restrictions on visas for any type of worker; employers are allowed to pay moving expenses; few restrictions or procedures for obtaining work visas.

- 5:** Government program to recruit workers or settlers; government pays for the workers' transportation cost and helps pay for firms or government officials to recruit workers.

*Examples of Coding for the Recruitment Category.* Table A3 uses Australia's policies on recruitment as an example of how this category is coded. It also provides an example of how federal states are coded before the federal government takes sole responsibility for the policy; prior to becoming a commonwealth in 1901, we code the policy of the most open state.

**Labor Prohibitions.** Another way to regulate immigration is to deter people from migrating by prohibiting them from working in certain industries or limiting the number of immigrant workers that employers can use. When coding labor regulations, we gave states with few regulations the highest score and states that excluded immigrants from many positions or let them be only a small part of the labor force the lowest score.

*Coding Criteria for the Labor Prohibitions Category.* Can immigrants work in all occupations? Are there requirements to have a certain number of native workers in an occupation/firm or that foreign workers can make up only a certain percentage of workers? Do the rules cover all occupations? Just certain industries? Are there racially based policies? A score of 1 means that immigrants are not allowed to work in any industry. This is not the case for any of the states in this sample. A score of 5 means that there are no restrictions or, in modern times, that the only restrictions are in highly sensitive national security positions.

- 1:** Immigrants completely blocked from the labor market.
- 2:** Immigrants restricted from many occupations; less than 30% of the workers in a given occupation/firm can be immigrants (covering most or all of occupations).
- 3:** Immigrants restricted from some occupations; 30-50% of workers in given occupation/firm can be immigrants (covers some occupations).
- 4:** Immigrants cannot hold public sector positions; 50% or more of the workers in a given occupation/firm can be immigrants (covers some occupations).



TABLE A3. Examples of Coding of Australia's Recruitment Policies

| Year | Restrictions                                                                                                                                                                                                                                                                                                                                                                                                                                                                                                    | Recruitment | Coding |
|------|-----------------------------------------------------------------------------------------------------------------------------------------------------------------------------------------------------------------------------------------------------------------------------------------------------------------------------------------------------------------------------------------------------------------------------------------------------------------------------------------------------------------|-------------|--------|
| 1792 | First settlers are given free passage, land grants, provisions for two years, tools and implements, and the services of a convict for two years.                                                                                                                                                                                                                                                                                                                                                                |             | 4.5    |
| 1807 | Created a graduated scale by which the amount of land and other assistance granted to settlers would depend on the amount of capital they brought to the colony. Capital of £100 would entitle the settler to 50 to 100 acres of land, livestock, and the services of two convicts with their families for 12 months. Capital of £500 would entitle the settler to 300-500 acres, additional livestock, and six convicts. Capital of £6000 earned the settler from 5000-6000 acres, livestock, and 20 convicts. |             | 4.4    |
| 1814 | Change in assisted passage rules that after 1817 settlers should only be granted land, provisions, and convicts and not passage                                                                                                                                                                                                                                                                                                                                                                                 |             | 4.25   |
| 1818 | Only emigrants with capital of at least £500 could receive land.                                                                                                                                                                                                                                                                                                                                                                                                                                                |             | 4.15   |
| 1831 | New South Wales begins scheme of assisted female emigration, along with skilled workmen. Each family of skilled workmen were to be advanced £20 for the trip to Australia. For female emigration, the government was to contribute £8 or about half the cost of passage. Preference was to be given to women traveling with their families, to those who were qualified to act as servants in agricultural districts, and to those who were prepared to pay a larger proportion of the passage money.           |             | 4.5    |
| 1835 | Loan program for skilled workers in New South Wales becomes a free bounty. All passages became entirely free and paid out of the colonial funds. Creation of two systems: the bounty and government system. Bounty system: settlers were to receive a bounty if they introduced "likely to be useful members of their class in society." The government system: emigration commissioners in London emigration chose migrants for free passage                                                                   |             | 4.75   |
| 1847 | Assistance to immigrants from outside the UK first granted.                                                                                                                                                                                                                                                                                                                                                                                                                                                     |             | 4.8    |
| 1873 | Regulations who qualified for assistance were loosened.                                                                                                                                                                                                                                                                                                                                                                                                                                                         |             | 4.9    |
| 1893 | All Australian colonies stop offering assisted passage                                                                                                                                                                                                                                                                                                                                                                                                                                                          |             | 4      |
| 1896 | Queensland revives financial aid for immigrants                                                                                                                                                                                                                                                                                                                                                                                                                                                                 |             | 4.25   |
| 1906 | Resumption of assisted immigration for all parts of Australia                                                                                                                                                                                                                                                                                                                                                                                                                                                   |             | 4.25   |
| 1917 | Free third class passages for those who were assured of employment or who took up land. Widows and dependents of ex-servicemen were eligible.                                                                                                                                                                                                                                                                                                                                                                   |             | 4.5    |
| 1922 | Beginning of Empire Settlement Act                                                                                                                                                                                                                                                                                                                                                                                                                                                                              |             | 4.65   |
| 1926 | Development and Migration Act of 1926 to assist the emigration of British implements the 34 million pound agreement.                                                                                                                                                                                                                                                                                                                                                                                            |             | 4.7    |
| 1930 | Australia virtually ceases assisted migration                                                                                                                                                                                                                                                                                                                                                                                                                                                                   |             | 4.05   |
| 1937 | Assisted migration resumes under the Empire Settlement Act.                                                                                                                                                                                                                                                                                                                                                                                                                                                     |             | 4.25   |
| 1946 | Assisted passage for British and Polish ex-servicemen in Britain and their dependents; other selected British migrant and Dutch farmers.                                                                                                                                                                                                                                                                                                                                                                        |             | 4.5    |
| 1948 | Scope of free and assisted passage schemes with Britain was widened; new program for assisted passage from Ireland                                                                                                                                                                                                                                                                                                                                                                                              |             | 4.75   |
| 1951 | Assisted migration agreement arranged with Italy and The Netherlands.                                                                                                                                                                                                                                                                                                                                                                                                                                           |             | 4.85   |
| 1952 | Assisted migration agreement with West Germany was signed.                                                                                                                                                                                                                                                                                                                                                                                                                                                      |             | 4.9    |
| 1954 | Provided assisted passage for people from the US, Switzerland, Denmark, Norway, Sweden, and Finland.                                                                                                                                                                                                                                                                                                                                                                                                            |             | 4.9    |
| 1955 | End of assisted passage for ex-WWII servicemen. The government restricted the steadily increasing entry of southern Europeans.                                                                                                                                                                                                                                                                                                                                                                                  |             | 4.75   |
| 1957 | Bring out a Briton Campaign                                                                                                                                                                                                                                                                                                                                                                                                                                                                                     |             | 4.8    |
| 1982 | Abolishment of assisted passages, except for refugees.                                                                                                                                                                                                                                                                                                                                                                                                                                                          |             | 3.5    |

TABLE A4. Examples of Coding of Singapore’s Labor Prohibitions

| Year | Restrictions                                                                                                                                    | Labor Prohibitions | Coding |
|------|-------------------------------------------------------------------------------------------------------------------------------------------------|--------------------|--------|
| 1987 | Creation of dependency ratios. For all sectors except domestic workers and marine sectors, employers can only employ up to 50% foreign workers. |                    | 3.25   |
| 1988 | Firms can employ 40% foreign workers in all sectors except domestics.                                                                           |                    | 3.5    |
| 1990 | Malaysians can be employed in any sector. For others, previous prohibitions apply.                                                              |                    | 3.75   |
| 1992 | Percent of workers in manufacturing who can be foreign is raised to 45%; service sector is now set at 20%, and construction 80%.                |                    | 3.75   |
| 1994 | Service sector to 25%, manufacturing to 50%.                                                                                                    |                    | 4      |

**5:** Immigrants can hold any position (except for highly sensitive national security positions); no restrictions on the number of immigrant workers in a given occupation/firm.

*Example of Coding for the Labor Prohibitions Category.* Table A4 gives examples of how Singapore has used labor prohibitions and how these restrictions have been coded. Taiwan has used a similar dependency ratio since 1992, but set even lower limits on the use of foreign workers. In the Persian Gulf, states have passed “native-ization” (Saudi-zation, Kuwati-zation, etc.) laws that require employers to increase the percentage of natives that firms employ by replacing foreign workers with natives. Saudi Arabia passed its first Saudi-zation law in 1969 when it stipulated that Saudis must make up 75 percent of employees for firms with more than 100 workers and that they must make up 51 percent of the payroll.

**Family Reunification.** The coding of family migration is based on how many family members a citizen or resident can sponsor as well as how hard it is for them to sponsor their family member. States are given the highest score if citizens and residents can easily sponsor many degrees of relatives (e.g., spouses, adult children, parents, and siblings). States are scored lower if they restrict the degrees of family that can be sponsored and if they increase the difficulty in sponsoring relatives, such as by requiring citizens or residents sponsoring

family members to make a certain level of income. States are given the lowest score if they allow only native-born and wealthy men to sponsor wives and minor children. For example, Saudi Arabia allows native-born men and wealthy, high-skill expatriate men, but not women, to sponsor their spouse and children.

*Coding Criteria for the Family Reunification Category.* Do family members get special treatment? Can they immigrate more easily than others? Are there racial or skill distinctions?

A score of 1 indicates that no family members are given special treatment and a score of 5 indicates that many family members are given special treatment. Most states fall somewhere between a 2—special treatment for wives and minor children only—and a 4—wives and minor children and sometimes parents can enter without difficulty and all other relatives can be sponsored with some occupational or skill requirements. One issue with family migration is that states did not seem to consider it a necessary policy to have when there were few restrictions by nationality or skill. Family reunification policies came into being only once other restrictions were put in place. Given that the states have no policy on family migration during these times, these years are scored as a 1.

- 1:** No special provisions for family reunification; family members must enter under the same procedures as others.
- 2:** Only wives and minor children of citizens or legal permanent residents can be sponsored, but are free from other controls.
- 3:** Increased number of relatives can be sponsored (e.g., adult children or dependent parents) but only by citizens and/or relatives (except minor children and wives); need to possess the same characteristics as non-family immigration (i.e., if there is a literacy test, relatives must pass the test); a relative in the country has to pay bond or otherwise be responsible.
- 4:** Many categories of relatives can be sponsored by citizens or residents (e.g., siblings, parents not dependent on migrant) but still must possess the same characteristics as

non-family immigrants (except minor children and wives); a relative in the country has to be responsible for immigrant.

**5:** Many categories of relatives can be sponsored by citizens or residents and they do not need to possess the characteristics of non-family immigrants (exemption from literacy exams, etc.); no bond required or responsibility for the relative in the country.

**Family Provisions:** Coded 0 before first mention of special provisions for families; 1 after.

*Example of Coding for the Family Reunification Category.* Table A5 shows how major changes in US family reunification policy were coded as well as an alternative coding. Under the main coding rules, family reunification is coded as a 1 from 1790 until 1917 and under the alternative coding, it is coded as a 5 from 1790 until 1884 when the nationality coding falls below 4. The 1917 Literacy Act provided the first family reunification policy by allowing wives and minor children to enter the US without taking the literacy test.

Table A6 shows how family reunification is coded in a point system using Canada's family reunification as an example. Similar to the US, Canada did not have a separate policy for family migrants until the early twentieth century.

**Refugee Policy.** The final two dimensions of border regulations also look at potentially non-economic migrants: refugees and asylees. A refugee is defined as a person fleeing from their country who is outside the state they are trying to enter. Refugee policy, then, deals with the resettlement of refugees. An asylee is defined as someone who is at the state's borders or inside the country who claims refugee status and asylum policy deals with whether the migrant can gain entry to or stay in the state.

States are coded depending on the ease of entry as a refugee or asylum seeker. States without a refugee or asylee status are coded as a 1. Similar to family reunification, most states had no refugee or asylum policies until after World War I and have not adopted any refugee or asylum policies. But in the nineteenth century, migrants who we would now categorize as refugees could immigrate to most states as a general migrant. As in the family

TABLE A5. Examples of Coding of US Family Reunification Policies

| Year | Restrictions                                                                                                                                                                                                                                                                                                                                                                                                                                                                                              | Family Reunification |                  |                  |
|------|-----------------------------------------------------------------------------------------------------------------------------------------------------------------------------------------------------------------------------------------------------------------------------------------------------------------------------------------------------------------------------------------------------------------------------------------------------------------------------------------------------------|----------------------|------------------|------------------|
|      |                                                                                                                                                                                                                                                                                                                                                                                                                                                                                                           | Coding               | Existence of Law | Alternate Coding |
| 1790 | No policy.                                                                                                                                                                                                                                                                                                                                                                                                                                                                                                | 1                    | 0                | 5                |
| 1884 | Nationality Coding drops below 4.                                                                                                                                                                                                                                                                                                                                                                                                                                                                         | 1                    | 0                | 1                |
| 1917 | Wives and minor children are allowed to enter without taking the literacy test.                                                                                                                                                                                                                                                                                                                                                                                                                           | 2                    | 1                | 2                |
| 1921 | The quota limitation, however, did not apply to minor children of citizens. Also granted preference to wives, parents, brothers, sisters, children under 18, and fiancées of citizens and resident aliens, who had made application for citizenship, and non-citizens who had honorably served in WWI.                                                                                                                                                                                                    | 3.5                  | 1                | 3.5              |
| 1924 | Preference quota status was established for: unmarried children under 21, parents, and spouses of U.S. citizens aged 21 and over; non-quota status was accorded to: wives and unmarried minor children under 18 of U.S. citizens.                                                                                                                                                                                                                                                                         | 3.5                  | 1                | 3.5              |
| 1952 | Non-quota classes changed to include children and spouses of citizens without regard to age of children or date of marriage. Revision of quota preference to include 30% second preference plus unused visas for parents of adult citizens, 20% percent third preference plus unused visas for spouses and children of lawfully admitted resident aliens, and any remaining unused visas for other qualified immigrants but with a 25% preference within the fourth class to close relatives of citizens. | 3.5                  | 1                | 3.5              |
| 1965 | Established two categories of immigrants not subject to numerical restrictions: 1. Immediate relatives (spouses, children, parents) of U.S. citizens. Preference order (a) unmarried sons and daughters of citizens (20%) (b) spouses and unmarried children of resident aliens (20% + unused from a), (d) married children of citizens (10%+unused a-c) (e) siblings of citizens (24% + unused).                                                                                                         | 4.75                 | 1                | 4.75             |
| 1990 | Allocates an unlimited number of visas for immediate relatives of US citizens and 226,000 visas for other family-based immigration. New category establishing 55,000 visas per year for 3 years that go to immediate family members of those legalizing under amnesty programs. Family admissions capped at 520,000 for 1992-94 and at 480,000 from 1995 on. Also, 55,000 visas provided per year for 3 years to immediate relatives of persons legalizing under IRCA.                                    | 4.5                  | 1                | 4.5              |

TABLE A6. Examples of Coding of Canadian Family Reunification Policies

| Year | Restrictions                                                                                                                                                                                                                                                                                                                                                                                                                                                                                                                                                                                                                                                                                                                                                                                                                                 | Family Reunification |                  |                  |
|------|----------------------------------------------------------------------------------------------------------------------------------------------------------------------------------------------------------------------------------------------------------------------------------------------------------------------------------------------------------------------------------------------------------------------------------------------------------------------------------------------------------------------------------------------------------------------------------------------------------------------------------------------------------------------------------------------------------------------------------------------------------------------------------------------------------------------------------------------|----------------------|------------------|------------------|
|      |                                                                                                                                                                                                                                                                                                                                                                                                                                                                                                                                                                                                                                                                                                                                                                                                                                              | Coding               | Existence of Law | Alternate Coding |
| 1783 | No policy.                                                                                                                                                                                                                                                                                                                                                                                                                                                                                                                                                                                                                                                                                                                                                                                                                                   | 1                    | 0                | 5                |
| 1902 | Nationality coding drops below a 4.                                                                                                                                                                                                                                                                                                                                                                                                                                                                                                                                                                                                                                                                                                                                                                                                          | 1                    | 0                | 1                |
| 1921 | Allowed the entry of wives and children of Indian migrants already settled in Canada.                                                                                                                                                                                                                                                                                                                                                                                                                                                                                                                                                                                                                                                                                                                                                        | 2                    | 1                | 2                |
| 1926 | Immigrants from the preferred countries of Northern Europe and Scandinavia could enter if they were sponsored by Canadian relatives.                                                                                                                                                                                                                                                                                                                                                                                                                                                                                                                                                                                                                                                                                                         | 3                    | 1                | 3                |
| 1930 | All immigrants except dependents of already established heads of families were excluded from entry. Asian immigration was restricted to the wife and unmarried minor children of any Canadian citizen who was in a position to care for his dependents.                                                                                                                                                                                                                                                                                                                                                                                                                                                                                                                                                                                      | 2                    | 1                | 2                |
| 1937 | The criteria of admissible immigrants was broadened to include the fiancées of male residents who were able to support their intended wives.                                                                                                                                                                                                                                                                                                                                                                                                                                                                                                                                                                                                                                                                                                 | 2.5                  | 1                | 2.5              |
| 1946 | Extended admissible classes for non-Asians to include brothers, sisters, parents, and orphaned nephews and nieces under 18 of Canadian citizens as long as the Canadian citizen agreed to sponsor them.                                                                                                                                                                                                                                                                                                                                                                                                                                                                                                                                                                                                                                      | 3.5                  | 1                | 3.5              |
| 1967 | Immediate relatives could continue to be sponsored, more distant "nominated" relatives would be subjected to the long-term criteria in points system but the short term requirements were waived.                                                                                                                                                                                                                                                                                                                                                                                                                                                                                                                                                                                                                                            | 3                    | 1                | 3                |
| 1976 | Family class was exempted from point system and only needed to pass security, criminal, and medical screening. Family class included: spouses, fiancées, unmarried minor children, aged (over 60) or disabled parents, orphaned siblings, nieces, nephews, or grandchildren under 18 and unmarried. Sponsorship for both Canadian citizens and residents; sponsors assessed for their ability to satisfy an undertaking to provide lodging, care, etc. for up to 10 years. Individuals not in family class might fall into assisted relatives. A relative in Canada must be willing to provide assistance for up to 5 years and the individual in question must have also been able to satisfy some of the selection criteria of independent class. Assisted relative includes: siblings, aunts/uncles and their children, and grandparents. | 3.5                  | 1                | 3.5              |
| 1992 | Change family class eligibility to all parents, regardless of age; all children under 19 and children above that age if they are dependent on the parents                                                                                                                                                                                                                                                                                                                                                                                                                                                                                                                                                                                                                                                                                    | 4                    | 1                | 4                |
| 1996 | The sponsor and the family member being sponsored will now be required to sign a new agreement outlining mutual obligations to support themselves for their first 10 years in Canada. Persons in prison will not be able to sponsor immigrants, nor will persons who have defaulted on sponsorship agreements.                                                                                                                                                                                                                                                                                                                                                                                                                                                                                                                               | 3.5                  | 1                | 3.5              |

reunification case, the main coding codes refugee and asylum policy as a 1 in these states even when a refugee could come in as a general migrant. I use an alternate coding where these states are coded as having a very generous refugee and asylum program (coded as a 5) until there are nationality or skill regulations that would bar the entrance of refugees or asylum seekers (operationalized as the nationality or skill coding dropping below a 4) and then the policy was coded as a 1.

Refugee policy is coded based on the definition of who counts as a refugee, whether there is a formal resettlement process or an ad-hoc process, the number of refugees that are re-settled, and whether there are preference categories for refugees.

*Coding Criteria for the Refugee Category.* Does the state have a resettlement policy? Does it resettle refugees on an ad hoc basis? How selective is their refugee policy? Do they let in many refugees? Are refugees defined as only those who meet the 1951 convention or 1967 protocol or is there a more expansive definition?

Refugee policy is coded as a 1 if the country has no special policy and a 5 if the country is willing to resettle large numbers of refugees without taking into consideration the refugees' qualifications. This last criterion distinguishes the more generous refugee policies of the current day with those after World War II when most receiving countries placed occupational restrictions on refugees, selecting for higher-skilled migrants. Ad hoc refugee programs for one group during the crisis are coded as relaxing refugee restrictions and the magnitude of the change is based on the number of refugees the state was willing to allow in. The change in coding lasts only as long as the refugee program was in place; for example, when New Zealand took in Ugandan refugees in 1973, but no other years, the increase in the refugee score is calculated for 1973 only.

- 1:** Almost no refugees allowed in; those that are allowed in must follow normal immigration procedures.

- 2:** Some refugees allowed in; special refugee visas but refugees chosen by some sort of preference or must be able to pass tests that non-refugee immigrants take; few reasons for being a refugee or ad hoc policy.
- 3:** Special refugee visa; preference system but not overly burdensome; moderate number of refugees allowed in; must follow some of the requirements that a non-refugee immigrant would have to pass; the UN definition of a refugee is followed.
- 4:** Large number of refugees allowed in; no preference system or very weak system; easy to obtain refugee visa; exemption from requirements of non-refugee immigrant; at least the UN definition of a refugee is followed.
- 5:** Large number of refugees; no preference system or requirements; very easy to obtain refugee visa; many categories of refugees included, not just the UN definition.

**Refugee Provisions:** Coded 0 before first mention of refugee in law; 1 after.

*Example of Coding for the Refugee Category.* Tables A7 again use the US as an example. Prior to the Displaced Persons Act (DPA) in 1948, the US did not have a formal refugee policy. Throughout the 1950s and into the 1960s, the US extended the DPA program and created other ad-hoc programs to deal with the Hungarian and Cuban refugee crises. In the 1970s, the US again used an ad-hoc program to resettle Cambodian and Vietnamese refugees. Finally in 1980, the US created a permanent refugee program.

**Asylum Policy.** States are coded as having a more generous asylum policy when they make it easier for asylum seekers to obtain status. When states enact safe-country-of-origin policies that make it impossible for citizens of that state to claim refugee status; safe third-country policies that force asylum seekers to make an claim in that third-country; policies that allow border agents to decide that a claim is manifestly unfounded; and the like, the policy is coded as more restrictive.

*Coding Criteria for the Asylum Category.* Does the law discuss asylum seekers? That is, migrants who are at the border or in the state claiming refugee status? How easy is it to



TABLE A7. Examples of Coding of US Refugee Policies

| Year | Restrictions                                                                                                              | Refugee Policy |                  |                  |
|------|---------------------------------------------------------------------------------------------------------------------------|----------------|------------------|------------------|
|      |                                                                                                                           | Coding         | Existence of Law | Alternate Coding |
| 1790 | No policy                                                                                                                 | 1              | 0                | 5                |
| 1884 | Nationality Score below 4                                                                                                 | 1              | 0                | 1                |
| 1948 | Displaced Persons Act                                                                                                     | 4              | 1                | 4                |
| 1949 | No change                                                                                                                 | 4              | 1                | 4                |
| 1950 | Increased the number of refugees to be resettled                                                                          | 4.25           | 1                | 4.25             |
| 1951 | Extended the time allowed for admission for refugees                                                                      | 4.25           | 1                | 4.25             |
| 1953 | Provided 205,000 special non-quota visas for refugees                                                                     | 4.25           | 1                | 4.25             |
| 1958 | Bill granted admission for permanent residence to Hungarian parolees                                                      | 4.25           | 1                | 4.25             |
| 1960 | Authorizes the AG to parole refugees. Decrease in quota for refugees.                                                     | 3.5            | 1                | 3.5              |
| 1975 | Established a program of domestic resettlement for Cambodian and Vietnamese refugees                                      | 4              | 1                | 4                |
| 1980 | Refugee Act Passed. Creates resettlement program.                                                                         | 4.5            | 1                | 4.5              |
| 1989 | The Lautenberg Amendment allows Jews, Evangelical Christians, and Ukrainian Catholics from the USSR to enter as refugees. | 4.75           | 1                | 4.75             |

gain asylum? What rights do asylum seekers and asylees have? Are they kept in detention centers? Are they repatriated? Is there only one asylum status or is there temporary protected status as well? What are the procedures and are there legal safeguards?

**1:** No asylum.

**2:** Extremely difficult process; asylum granted only in a few cases; little ability to work or access welfare state while awaiting determination; little recourse if not granted asylum; no temporary protected status; limited access for political refugees.

- 3:** Difficult process; asylum granted for more cases; some access to the welfare state or labor market; more recourse including ability to access courts if denied; some temporary protected status allowed.
- 4:** Fairly easy process; asylum granted to many groups; access to labor market and welfare system; access to courts and other procedures if denied; temporary protected status given to many groups.
- 5:** Easy process; asylum granted for most cases; access to labor markets and welfare state; constitutionally protected procedure; no need for temporary protected status because almost everyone gets asylum.

**Asylum Provisions:** Coded 0 before first mention of asylum; 1 after.

*Examples of Coding for Asylum Category.* Table ?? also uses US asylum policy as an example. The US first allowed for asylum when Congress began regulating immigration in 1875 by allowing entry to those who had committed a political crime because they would have been denied entry as a criminal. The US did not create a more formal asylum process until 1980.

**Citizenship.** Citizenship is the most important right for an immigrant as it allows the immigrant to have the same rights as natives and prevents their deportation.

**Coding Criteria for the Citizenship Category.** Does the law mention citizenship? How easy is it to obtain citizenship? What determines citizenship for children born in the country (*jus sanguinis*, *jus soli*, *double jus soli*)? Are there racial discriminations in citizenship? How easy is it for the government to denaturalize citizens? A score of 1 denotes states where citizenship is given through one parent (usually the father) only by birth. A score of 5 denotes *jus soli* citizenship (citizenship given to all children born in the state) and an easy naturalization process. Racial discrimination in citizenship policies leads to a lower score as well.

- 1:** Only by birth from a native father or mother.

- 2: Only by birth through either native parent and/or grandparent.
- 3: Very difficult process to obtain citizenship (language requirements, difficult test) and/or many years to citizenship (more than ten years) and/or children receive citizenship through either parent or grandparent.
- 4: Moderately difficult process (relatively easy language requirements and/or an easy test) and/or moderate time to citizenship (more than five but less than ten years) and/or children born in state automatically get citizenship.
- 5: Fairly easy process (e.g., no language requirements) and short time to citizenship (five or less years) and children born in state automatically get citizenship.

*Example of Coding for the Citizenship Category.* Table A8 uses the UK's citizenship policies as an example of how citizenship was used to both attract and repel certain immigrants, especially immigrants from current and former colonies.

**Immigrant Rights.** This category captures the rights states give immigrants, besides citizenship and access to the labor market that are covered in other dimensions. All other rights are included in this category: access to the social welfare system; the ability to own land or a business; the ability to vote in local elections, have state-sponsored schools in the immigrants' native language, or have the state pay for a religious leader in the immigrants' faith, etc. Also incorporated in this category are programs designed to help immigrants learn the native language or otherwise integrate into society. The more rights states grant, measured in comparison to the rights of citizens, the higher the score and the fewer rights granted the lower the score. The other rights score is also affected by whether there is discrimination in the law based on the immigrants' nationality or race.

*Coding Criteria for the Immigrant Rights Category.* Does the law mention what rights immigrants have once in the state? Are there racial/national origin discriminations? Does the government try to integrate immigrants or does it just expect them to assimilate? How easy is it to get permanent residency? Can immigrants access the social welfare system?

TABLE A8. Examples of Coding of British Subjecthood/Citizenship Regulations

| Year | Restrictions                                                                                                                                                                                                                                                                                                                                                                                                                                                                                                                                                                                                                                                                                          | Citizenship | Coding |
|------|-------------------------------------------------------------------------------------------------------------------------------------------------------------------------------------------------------------------------------------------------------------------------------------------------------------------------------------------------------------------------------------------------------------------------------------------------------------------------------------------------------------------------------------------------------------------------------------------------------------------------------------------------------------------------------------------------------|-------------|--------|
| 1792 | Jus soli and residency led to subjecthood                                                                                                                                                                                                                                                                                                                                                                                                                                                                                                                                                                                                                                                             |             | 4.5    |
| 1914 | Anyone born “within His Majesty’s dominions and allegiance” was automatically a subject. Children of British subjects gained subjecthood as well. New naturalization scheme (including within the dominions) with a universal five years residence requirement.                                                                                                                                                                                                                                                                                                                                                                                                                                       |             | 4.5    |
| 1948 | When a dependent territory achieves independence, most of its natives normally lose their citizenship of the UK and Colonies and become citizens of the new state. Allowed those persons who fail to obtain citizenship of the succeeding state, to retain citizenship of the UK. The law of UK ensured that most immigrants from the Commonwealth countries and from Ireland should have the right to take citizenship of the UK and colonies after satisfying a resident requirement. Establishes two categories of citizenship: citizens of the United Kingdom and the colonies (CKUCs) and citizens of the Commonwealth, both with unrestricted rights to enter and reside in the United Kingdom. |             | 4.5    |
| 1949 | Act restored British nationality to women who had lost it by marriage and provided that in future marriage should not automatically affect a woman’s nationality.                                                                                                                                                                                                                                                                                                                                                                                                                                                                                                                                     |             | 4.75   |
| 1964 | Entitles a stateless person to be registered if his parents were British subjects without citizenship at the time of his birth, and have retained that status, and if he has ordinarily resided in the UK for three years. The same act entitles a stateless person to be registered if he was born in a place which, at the time of his birth, was within the UK and colonies or if his mother was a citizen of the UK and Colonies at the date of his birth.                                                                                                                                                                                                                                        |             | 5      |
| 1968 | This act introduced the concept of patriality, restricting the entry of non-patrials with UK passports, including the East African Asians, by a special voucher system. Only 1500 special vouchers per year were issued to the heads of households, entitling them and their dependents entry to the UK.                                                                                                                                                                                                                                                                                                                                                                                              |             | 4      |
| 1971 | Conditions for citizenship are 5 years residence, good character, a sufficient knowledge of English, and an intention to reside in the UK. A Commonwealth citizen who is a patrial has an absolute right to be registered after five years’ residence. A woman who is not a citizen has the right to acquire citizenship by registration if she marries a citizen.                                                                                                                                                                                                                                                                                                                                    |             | 3.75   |
| 1981 | Defines three classes of citizens. British citizens are defined as persons born in the UK or whose parents or grandparents were born or naturalized in the UK. Citizens of dependent territories are those whose parents were born in dependent territories; these citizens have no right to enter the UK. British overseas citizens are children of British citizens born outside of the UK. They have the right to enter and live in the UK but cannot pass their citizenship onto their children. Children born in the UK to permanent residents automatically obtain citizenship; all other children born to immigrants can acquire British citizenship if they live in the UK for 10 years.      |             | 3.5    |
| 1985 | Those who live in Hong Kong with British Dependent Territory Citizenship will lose their status in 1999.                                                                                                                                                                                                                                                                                                                                                                                                                                                                                                                                                                                              |             | 3.4    |
| 1989 | Right of abode granted to highly qualified minority of Hong Kong residents.                                                                                                                                                                                                                                                                                                                                                                                                                                                                                                                                                                                                                           |             | 3.45   |
| 1999 | The British government announced that it will grant full citizenship to its 150,000 remaining inhabitants in 13 overseas territories.                                                                                                                                                                                                                                                                                                                                                                                                                                                                                                                                                                 |             | 3.75   |
| 2002 | Law requires applicants for British citizenship to take language classes and demonstrate that they understand British society.                                                                                                                                                                                                                                                                                                                                                                                                                                                                                                                                                                        |             | 3.5    |
| 2005 | Beginning November 1, 2005, foreigners naturalizing in the UK must pass a \$72 test demonstrating knowledge of Britain and its culture.                                                                                                                                                                                                                                                                                                                                                                                                                                                                                                                                                               |             | 3.25   |

A score of 1 indicates few legal rights: immigrants have to be registered; they have to go through invasive health checks; they do not have the right to marry nationals; they can live in only specific locations; they can work for only specific employers; they have no access to the welfare state; they cannot own land; they are discriminated against and they cannot gain permanent residency. In states coded as 1, immigrants can basically work only the job they were hired for and cannot leave the housing provided for them by their employer. A score of 5 indicates parity to citizens: complete access to the welfare state; voting rights; no restrictions in where they can live or work; no restrictions in property rights, and a robust anti-discrimination program.

- 1:** Almost no legal rights; immigrants must leave state if they leave their job; cannot own property; cannot access the welfare state; they have to register; have no freedom of religion, no permanent residency, etc.
- 2:** Some rights but land ownership and ownership of companies restricted; limited access to the welfare state.
- 3:** Ability to change jobs freely; some ownership of real property or companies; some access to the welfare state; some racial discrimination in laws.
- 4:** Access to most welfare policies; few restrictions on ownership of property or firms.
- 5:** Total access to welfare state; voting rights without citizenship; no restrictions in property ownership; integration policies; no racial discrimination; few years to permanent residency.

*Example of Coding for the Immigrant Rights Category.* Table A9 lists changes in the rights that Australia gives to immigrants. In the early days of the colony, immigrants had substantially the same rights as citizens of the colonies. Immigrants' other rights began to be curtailed in the early twentieth century when the Australian government began imposing discriminatory laws against Asian immigrants. After World War II, instead of deterring immigrant groups, the government sought to further encourage British and, later, other

European immigration by offering relatively easy access to social welfare benefits and educational courses for immigrants. They also began sponsoring foreign-language radio stations and other media to make immigrants feel more at home. These changes lead to an increase in the other rights score. In the 1990s, the goal of rights policies changed again: hoping once more to deter immigrants, especially low-skill immigrants, the government restricted access to the social welfare system and began requiring costly English training, rather than assisting immigrants. These changes lead to a decrease in the other rights score.

**Deportation.** The final set of policies includes enforcement and deportation. Policy-makers can pass many restrictions on immigration and the rights of immigrants; however, if these restrictions are not enforced, the law becomes a de facto open policy. Ideally, we might want to use the number of undocumented immigrants in a state as a de facto measure of enforcement. Nonetheless, since undocumented immigrants have broken the law, it is hard to get reliable estimates of the number of undocumented people, especially in autocracies. Instead, I code deportation and other enforcement measures.

States have often used deportation as an enforcement mechanism. The coding of deportation measures how easy it is to get rid of unwanted immigrants. Increased safeguards, such as access to courts, increase the score on deportation because this ensures that legal procedures will be followed. On the other hand, increasing the number of deportable offenses to include illegal immigration, losing one's job, going on welfare, or being part of a political or social group decreases the score. Paying immigrants to leave the country also decreases the score because this is clearly a sign that the government wants to decrease immigration. Some countries allow defenses against deportation such as being in the country a certain number of years or having a native-born wife or child who is dependent on the immigrant. Increasing the number of defenses against deportation increases the score. In contrast, mass expulsions decrease the score.

TABLE A9. Examples of Coding of Australia's Other Rights Regulations

| Year | Restrictions                                                                                                                                                                                                           | Other Rights | Coding |
|------|------------------------------------------------------------------------------------------------------------------------------------------------------------------------------------------------------------------------|--------------|--------|
| 1787 | Equal rights as citizens except voting.                                                                                                                                                                                |              | 4.75   |
| 1908 | Asians not born in Australia and aboriginal natives of Australia, Africa, and the islands of the Pacific were not entitled to a pension.                                                                               |              | 4      |
| 1912 | Leases to Aliens Restrictions Act: European can only get leases of up to five acres unless the immigrant passes a diction test.                                                                                        |              | 3.5    |
| 1914 | Asians cannot obtain land in irrigation areas in South Australia.                                                                                                                                                      |              | 3.25   |
| 1921 | Australian government removes from Indian and Sinhalese: no voting rights, no invalid or old-age pensions.                                                                                                             |              | 3      |
| 1946 | British ex-servicemen immigrants and their families were eligible for all social welfare benefits upon arrival except for employment assistance available to Australian servicemen.                                    |              | 3.5    |
| 1947 | Relaxation of laws against property ownership by non-European immigrants.                                                                                                                                              |              | 3.75   |
| 1958 | British immigrants were granted equal rights to social welfare benefits as Australians. Non-British immigrants did not qualify for all benefits until they naturalized and satisfied certain residential requirements. |              | 3.5    |
| 1969 | Full time English courses were introduced for well-qualified migrants to quickly gain a working knowledge of the language so they could resume their former occupations more rapidly.                                  |              | 3.75   |
| 1972 | Foreign language broadcasting was restricted to not more than 2.5% of a commercial radio station's weekly hours of transmission.                                                                                       |              | 3.65   |
| 1974 | Restrictions on foreign language broadcasting were lifted.                                                                                                                                                             |              | 3.85   |
| 1975 | Formally abolished discrimination on grounds of race, skin color, or nationality. Ethnic radio stations set up by the government in Sydney and Melbourne.                                                              |              | 4.5    |
| 1977 | National Ethnic Broadcasting Advisory Council was established and a new independent authority would be set up to provide ethnic broadcasting.                                                                          |              | 4.5    |
| 1991 | Increased charges on health services for immigrants.                                                                                                                                                                   |              | 4.25   |
| 1993 | Immigrants cannot access unemployment and medical benefits for the first 6 months after arrival.                                                                                                                       |              | 4      |
| 1996 | Increased waiting period for most welfare benefits to 2 years.                                                                                                                                                         |              | 3.5    |
| 1999 | Requirement for immigrants to pre-purchase English training for those who were accepted but who had inadequate proficiency.                                                                                            |              | 3.25   |
| 2000 | Restricted the right of New Zealand citizens living in Australia to obtain welfare benefits.                                                                                                                           |              | 3      |

*Coding Criteria for the Deportation Category.* How easy is it to deport an immigrant? What safeguards exist? Does the state engage in mass expulsions or pay people to leave the country?

A score of 1 denotes that there are many deportable offenses, including losing one's job and there are few administrative or judicial safeguards. A score of 5 is given if there are few deportable offenses (usually deportation is limited to criminals) and/or clear judicial checks.

- 1: No appeals process; many deportable offenses, including losing one's job.
- 2: Administrative process with few checks; fewer deportable offenses.
- 3: More checks on the process and even fewer deportable offenses.
- 4: Judicial checks on process including going to the highest court in the land and/or very few deportable offenses.
- 5: Almost no deportable offenses (conviction for a criminal offense, but not for an immigration offense) and clear judicial checks.

*Example of Coding for the Deportation Category.* Table A10 gives examples of how US deportation laws are coded.

**Enforcement.** Other than deportation, states use a variety of measures to enforce their borders. These policies include placing additional penalties on illegal immigration, sanctions on transportation companies that bring illegal immigrants, sanctions on employers who hire illegal immigrants, and measures to police the border. States also often give amnesty to those in the country illegally; in some cases the illegal immigrant is allowed to stay while in others s/he is forced to leave but does not have to pay any of the penalties for being in the country illegally. The dimension *other enforcement* seeks to measure these other mechanisms. Placing penalties beyond deportation on illegal immigrants (such as prison time or fines) leads to a lower score as enforce stricter employer sanctions. Amnesty leads to a higher score, but the increase depends on the size of the amnesty — how many people were given amnesty — and the type of amnesty. States with fines or prison time for those immigrants in the country illegally usually give amnesty which allows illegal immigrants to leave the country without paying a fine or serving jail time. In contrast, those states without extra penalties for illegal immigration usually allow illegal immigrants the ability to



TABLE A10. Examples of Coding of US Deportation and Enforcement Policies

| Year | Restrictions                                                                                                                                                                                                                                                                                                                                                                                                                      | Deportation<br>Coding | Restrictions                                                                                                                                                                                                                                                                                                                                                                                                                                                                                                                                                                                                | Enforcement<br>Coding |
|------|-----------------------------------------------------------------------------------------------------------------------------------------------------------------------------------------------------------------------------------------------------------------------------------------------------------------------------------------------------------------------------------------------------------------------------------|-----------------------|-------------------------------------------------------------------------------------------------------------------------------------------------------------------------------------------------------------------------------------------------------------------------------------------------------------------------------------------------------------------------------------------------------------------------------------------------------------------------------------------------------------------------------------------------------------------------------------------------------------|-----------------------|
| 1790 | No policy.                                                                                                                                                                                                                                                                                                                                                                                                                        | 5                     | No policy.                                                                                                                                                                                                                                                                                                                                                                                                                                                                                                                                                                                                  | 5                     |
| 1798 | President has the authority to deport immigrants deemed to be dangerous to the safety of the US.                                                                                                                                                                                                                                                                                                                                  | 2                     | No change.                                                                                                                                                                                                                                                                                                                                                                                                                                                                                                                                                                                                  | 5                     |
| 1812 | Permitted the arrest, imprisonment, and deportation of immigrant men from enemy nations.                                                                                                                                                                                                                                                                                                                                          | 2                     | No change.                                                                                                                                                                                                                                                                                                                                                                                                                                                                                                                                                                                                  | 5                     |
| 1882 | Allows for the deportation of foreign paupers, convict, Chinese in the US illegally.                                                                                                                                                                                                                                                                                                                                              | 4.5                   | No change.                                                                                                                                                                                                                                                                                                                                                                                                                                                                                                                                                                                                  | 5                     |
| 1891 | Deportation within one year of arrival for those who enter illegally or who become public charge.                                                                                                                                                                                                                                                                                                                                 | 4                     | Requires ship masters to pay return fares for those not admitted to the US. Inspection of immigrants along the Canadian and Mexican borders. Decisions of the immigration inspectors are not subject to judicial review and are final.                                                                                                                                                                                                                                                                                                                                                                      | 4.5                   |
| 1924 | No change.                                                                                                                                                                                                                                                                                                                                                                                                                        | 3.25                  | Those entering the US need to have a visa. Establishment of the Border Patrol.                                                                                                                                                                                                                                                                                                                                                                                                                                                                                                                              | 3.5                   |
| 1952 | Afforded greater procedural safeguards to aliens subject to deportation.                                                                                                                                                                                                                                                                                                                                                          | 3                     | Parole Authority given to AG. Made it a felony to bring in or willfully induce an alien to enter unlawfully or to harbor an undocumented immigrant. However, employment does not constitute harboring. Border Patrol officers may access private lands, but not dwellings, within 25 miles of the border.                                                                                                                                                                                                                                                                                                   | 3.5                   |
| 1986 | No change.                                                                                                                                                                                                                                                                                                                                                                                                                        | 3                     | Employer sanctions. Increased border patrols and inspections. But balanced by amnesty for undocumented immigrants.                                                                                                                                                                                                                                                                                                                                                                                                                                                                                          | 2.9                   |
| 1996 | Unauthorized foreigners that have lived in the US for at least 10 years and can prove that their removal would cause “exceptional and extremely unusual hardship” to a legally resident spouse, parent, or child may be granted a hardship exemption. Maximum of 4,000 hardship exemptions a year. Deportees may choose to depart voluntarily and not be barred from the US or be removed, barring them from the US for 10 years. | 2.75                  | Established a criminal alien identification system. Established certain alien smuggling-related crimes as RICO offenses. Established an interior repatriation program. Authorized State and Local officials to arrest and detain certain illegal aliens. Expedited process of criminal alien removal. Increased border enforcement. Improved barriers along the Southwest border. Increased penalties for alien smuggling. Increased penalties for illegal entry and failure to depart. Increased worksite enforcement. Reduced the number and types of documents that may be used for eligibility to work. | 2.5                   |
| 2004 | Anyone who had received military-style training from a terrorist organization could be deported. Those who had committed torture or other atrocities abroad could be deported.                                                                                                                                                                                                                                                    | 2.75                  | Added 2,000 full-time border patrol agents every year between 2006 and 2010. Increased the number of foreign “pre-inspection” stations. Required all visa applicants be interviewed in person. Prohibited judicial review of visa revocations. New driver’s license standards. Federal standards for state-issued birth certificates. Limits on replacement social security cards.                                                                                                                                                                                                                          | 2.5                   |

regularize their status and stay in the countries. Clearly, the first amnesty is more restrictive than the second in which fewer people are allowed to stay.

*Coding Criteria for the Enforcement Category.* Does the state enforce its borders? How strong is the enforcement? Are there employer sanctions, fines, or prison time for illegal immigrants? Are there amnesties? During an amnesty are immigrants allowed to stay or just leave without paying a fine? A score of 1 denotes a high-spending country, with severe employer sanctions, sanctions on those who are in the country legally, including fines and prison time, bonds to ensure that immigrants leave, and identification papers that are hard to forge. A score of 5 denotes no enforcement beyond basic police enforcement.

- 1:** High spending, employer raids, or hard-to-forge national work IDs, strong employer sanctions, bonds placed by employers to ensure that migrants go home, large number of enforcement officials.
- 2:** Slightly less spending, fewer raids, or easier-to-forge national work ID, border enforcement is strong but not impossible to overcome.
- 3:** Even less money, no raids, easy-to-forge IDs, some border enforcement.
- 4:** Very little enforcement, screening at points of entry, little enforcement on employers.
- 5:** Basically no enforcement.

*Example of Coding for the Enforcement Category.* Table A10 also gives examples of how enforcement laws in the US are coded.

## Appendix B: Sources for the Dataset

### Sources used by Boräng, Kalm, and Lindvall

Adamo, Silvia., 2007. “Legal Position of Migrants in Denmark: Assessing the Context around the “Cartoon Crisis”, *European Journal of Migration and Law*, vol.9, pp.1–24.

Aizpuru Mikel., (2010), ‘Retornos Forzados. La Expulsión De Extranjeros Indeseables En La España Contemporánea, 1919-1935’, *Historia Contemporánea* 39, pp. 591–625.

Al-Azar Rima., (2006), ‘Italian Immigration Policies - The Metaphor of Water’, *The Bologna Center Journal of International Affairs*, vol. 9, pp 35-52

Aliens Act, (1935), *Number 14 Of 1935. ALIENS ACT 1935*, Available online at

Aliens Order, (1946), *S.I. No. 395/1946 Aliens Order*, Available online at [<http://www.irishstatutebook.ie/eli/1946/sro/395/made/en/print>], Accessed 2018-07-26.

Alscher, Stefan. (2005). “Knocking at the Doors of “Fortress Europe”: Migration and Border Control in Southern Spain and Eastern Poland”, *Working paper*, the Center for Comparative Immigration Studies (CCIS). Available at: <http://stefan-alscher.de/resources/wrkg126.pdf> [2016-02-09].

Åmark Klas, (2013), *Sweden and the refugees, 1933-45*, in ‘Reaching a State of Hope’, ed., Byström M. & Frhonor P., pp. 39-54. Nordic Academic Press, Lund.

Antoons, Jo & Alexandre Pirotte, 2013. “Attracting Highly Qualified and Qualified Third Country Nationals to Belgium”. [Electronic]. Available at: [https://emnbelgium.be/sites/default/files/attachments/attracting\\_highly\\_qualified\\_and\\_qualifie\\_d\\_tcn\\_to\\_belgium\\_emn-study\\_2013.pdf](https://emnbelgium.be/sites/default/files/attachments/attracting_highly_qualified_and_qualifie_d_tcn_to_belgium_emn-study_2013.pdf). Accessed: 2023-07-20.

Arena Marta, Nascimbene Bruno., and Zincone Giovanna, (2006), ‘Legal and political overview. Italy’, in Bauböck, Rainer, Ersbøll, Eva, Groenendijk Kees, and Waldrauch Harald, (eds.), *Acquisition and loss of nationality. Policies and trends in 15 European states*, Volume 2.

Asa R., (2010), *Annual Policy Report 2010 – Finland*, European Migration Network.

Ataç, Ilker, 2014. “Determining Turkish migration to Austria. The role of migration policy”, *Migration Letters*, vol.11, no.3, pp.275-287.

Austrian Embassy Washington. (2015). *Facts and Figures. Austria’s Religious Landscape*. Available at <http://www.austria.org/religion/> [2015-10-06]

Bader-Zaar, Birgitta (2003). “Foreigners and the Law in Nineteenth-Century Austria. Juridical Concepts and Legal Rights in the Light of the Development of Citizenship” in Fahrmeir, Andreas, Olivier Faron and Patrick Weil (eds) (2003). *Migration control in the North Atlantic world: the evolution of state practices in Europe and the United States from the French Revolution to the inter-war period*. New York: Berghahn Books

Bakondy Vida et al., (2010), *el Glück! Migration heute. Wien, Belgrad, Zagreb, Istanbul / Good Luck! Migration today. Vienna, Belgrade, Zagreb, Istanbul, Wien*, Published by Mandelbaum Verlag, Vienna.

Bakondy, Vida, (2017) ““Austria Attractive for Guest Workers?”” - Recruitment of Immigrant Labor in Austria in the 1960s and 1970s’, pp. 113-138 in Bischof, Günther and Dirk Rüpnöw

(eds) *Migration in Austria*, Contemporary Austrian Studies Vol 26., Innsbruck University Press, Innsbruck.

Bauböck, Rainer (1994). *Transnational Citizenship. Membership and Rights in International Migration*. Hants, England: Edward Elgar Publishing Limited.

Bauböck, Rainer and Dilek Çinar (2001). "Nationality Law and Naturalisation in Austria" in Hansen, R. and P. Weil (2001). *Towards a European Nationality. Citizenship, Immigration and Nationality Law in the EU*. New York: Palgrave.

Bauböck, Rainer & Hannes Wimmer, 1988. "Social partnership and 'foreigners' policy': on special features of Austria's guest-worker system", *European Journal of Political Research*, vol.16, pp.659-681.

Bech, Emily Cochran, Borevi, Karin & Per Mouritsen, 2017. "A 'civic turn' in Scandinavian family migration policies? Comparing Denmark, Norway and Sweden", *Comparative Migration Studies*, vol.5, no.7, pp.1-24.

Bech, Emily Cochran and Mouritsen, Per 2013. "Restricting the right to family migration in Denmark: when human rights collide with a welfare state under pressure" in Elena Jurado & Grete Brochmann (eds.), *Europe's immigration challenge: Re-thinking immigration after the downturn*. London: Policy Network, pp.154-184.

Strik, Tineke, Betty de Hart, and Ellen Nissen (2012), *Family Reunification – a barrier or facilitator of integration? A comparative study*. Brussels: European Commission.

Becker, Peter, (2010), 'Governance of Migration in Habsburg Monarchy and the Republic of Austria' in *National Approaches to the Administration of International Migration*, pp. 32-52, (ed.) P. Arnold, IOS Press.

Becker, Peter, 2010. "Governance of Migration in Habsburg Monarchy and the Republic of Austria" in Peri Arnold (ed.) *National Approaches to the Administration of International Migration*, Amsterdam/Washington D.C: IOS Press. pp. 32-52.

Bernitz, Hedvig, 2012. *EUDO Citizenship Observatory. Country Report: Sweden* [Electronic]. Available at: [https://ec.europa.eu/migrant-integration/library-document/eudo-citizenship-observatory-country-report-sweden-0\\_en](https://ec.europa.eu/migrant-integration/library-document/eudo-citizenship-observatory-country-report-sweden-0_en). Accessed: 2023-07-20.

Beskæftigelseministeriet, 2018. "Regeringen fremlægger udspil om styrket rekruttering af udenlandsk arbejdskraft" Press release. 2018-10-03. [Electronic]. Available at: <https://bm.dk/nyheder-presse/pressemeddelelser/2018/10/regeringen-fremlaegger-udspil-om-styrket-rekruttering-af-udenlandsk-arbejdskraft/>. Accessed: 2019-04.30.

Betænkning nr. 589, (1971), *Udenlandske Arbejders Forhold i Danmark*, Det Juridiske Laboratorium, København.

Betænkning nr. 882, (1979), *Betænkning om Udlændingelovgivningen Administrative Retningslinier*, Det Juridiske Laboratorium, København.

Betænkning nr. 968, 1982. *Betænkning om Udlændingelovgivningen - Udkast til ny udlændingelov*, København: Det Juridiske Laboratorium.

Bettin Cristina M. (2010), *Italian Jews from Emancipation to the Racial Laws*, Palgrave Macmillan: Basingstoke.

- Biffl, Gudrun, 2011. "Satisfying Labour Demand Through Migration in Austria", Study of the National Contact Point Austria in the European Migration Network. Available at: [https://www.emn.at/wp-content/uploads/2017/01/labour-001-081-EN\\_download\\_incl.-cover.pdf](https://www.emn.at/wp-content/uploads/2017/01/labour-001-081-EN_download_incl.-cover.pdf)
- Biffl, Gudrun, Lea, Rennart & Aigner, Petra, 2011. "Migrant Workers in Austria and Europe. Challenges for Industrial Relations, in particular Trade Unions", Monograph Series Migration and Globalization. Available at: <https://door.donau-uni.ac.at/open/o:125>. Accessed: 2023-07-20.
- Blüdnikov, Bent (1986). *Immigranter. Østeuropæiske jøder i København 1904–1920*. Copenhagen: Borgen.
- Blüdnikov, Bent (Ed.) (1987). *Fremmede i Danmark. 400 års fremmedpolitik*. Odense: Odense Universitetsforlag.
- Blüdnikow, Bent (1987). "Fattig, fremmed og forvist" in Blüdnikov, B. (Ed.) (1987). *Fremmede i Danmark. 400 års fremmedpolitik*. Odense: Odense Universitetsforlag.
- BOE, (2018), *Ley 16/1970, de 4 de agosto, sobre peligrosidad y rehabilitación social*, [<https://www.boe.es/buscar/doc.php?id=BOE-A-1970-854>] [Accessed 2018-06-13].
- Bøegh-Lervang, Maria and Laura Madum, (2011), "Dobbeltspillet" in *Tidsskriftet Politik*, 14(4), pp. 35-44.
- Boguslaw Julia (2012), *Svensk invandringspolitik under 500 år: 1512-2012*, Lund: Studentlitteratur.
- Borevi, Karin, 2002. *Välfärdsstaten i det mångkulturella samhället*. Diss. Uppsala: Uppsala Universitet.
- Borevi, Karin, 2012. "Sweden: The Flagship of Multiculturalism" In Brochmann, Grete & Anniken Hagelund (eds), *Immigration Policy and the Scandinavian Welfare State 1945–2010*. Palgrave Macmillan, London, pp.25-96.
- Borevi, Karin, 2015. "Family migration Policies and Politics: Understanding the Swedish Exception", *Journal of Family Issues*, vol. 36, no.11, pp.1490–1508.
- Boswell, Christina and Andrew Geddes, 2011. *Migration and mobility in the European Union*. Basingstoke: Palgrave Macmillan.
- Bosworth, Richard. J. B. (1996). *Italy and the Wider World 1860-1960*. London: Routledge.
- BPR = Belgian Policy Report. "Belgian Policy Report on migration and asylum: with a special focus on immigration and integration". [Electronic]. Available at: <https://emnbelgium.be/sites/default/files/publications/be-study1.pdf2004.pdf>. Accessed: 2023-07-20.
- Brekke, Jan-Paul, and Anne Staver, 2018. "The renationalization of migration policies in times of crisis: the case of Norway", *Journal of Ethnic and Migration Studies*, vol. 44, no.13, pp.2163-2181.

Brochmann Grete (2010), EUDO Citizenship Observatory Country Report: Norway, EUDO Citizenship Observatory, San Domenico di Fiesole.

Brochmann, Grete & Anniken Hagelund, 2012. “Norway: Land of the Golden Mean” in Brochmann, Grete & Anniken Hagelund (eds), *Immigration Policy and the Scandinavian Welfare State 1945–2010*. Palgrave Macmillan, London, pp.149-224.

Cooper, Betsy, 2005. “Norway: Migrant Quality, Not Quantity”. [Electronic]. Available at: <https://www.migrationpolicy.org/article/norway-migrant-quality-not-quantity>. Accessed: 2023-07-20.

Brochmann, Grete, 2013. *EUDO citizenship observatory, country report: Norway* [Electronic]. Available at: [https://cadmus.eui.eu/bitstream/handle/1814/19630/RSCAS\\_EUDO\\_CIT\\_2013\\_21.pdf?sequence=3&isAllowed=y](https://cadmus.eui.eu/bitstream/handle/1814/19630/RSCAS_EUDO_CIT_2013_21.pdf?sequence=3&isAllowed=y). Accessed: 2023-07-20.

Boeri, Tito, Herbert Brücker, Frédéric Docquier and Hillel Rapoport (eds) 2012. *Brain Drain and Brain Gain: The Global Competition to Attract High-Skilled Migrants*, Oxford Scholarship Online, Oxford.

Bundesgesetzblatt 450/1990. *Bundesgesetz: Änderung des Ausländerbeschäftigungsgesetzes, des Mutterschutzgesetzes 1979, des Eltern-Karenzurlaubsgesetzes und des Landarbeitsgesetzes 1984. (NR: GP XVII IA 442/A AB 1462 S. 152. BR: AB 3969 S. 533.)* Available at: [https://www.ris.bka.gv.at/Dokumente/BgblPdf/1990\\_450\\_0/1990\\_450\\_0.pdf](https://www.ris.bka.gv.at/Dokumente/BgblPdf/1990_450_0/1990_450_0.pdf). Accessed: 2019-05-07.

Bussotti Luca (2016), ‘A History of Italian Citizenship Laws during the Era of the Monarchy (1861-1946)’ *Advances in Historical Studies*, 5(1), pp. 143-167.

Byström Mikael and Frohnert, Per (2013), *Reaching a State of Hope*, Nordic Academic Press, Lund.

Caestecker Frank & Moore Bob (2010), *Refugees from Nazi Germany and the Liberal European States*, Berghahn Books, Oxford.

Caestecker, Frank (2000), *Alien Policy in Belgium, 1840-1940 – The Creation of Guest Workers, Refugees and Illegal Aliens*, Berghahn Books, Oxford.

Caestecker, Frank (2013), “Sweden’s exceptional ability to organize its immigration”, in *Reaching a State of Hope*, ed., Byström Mikael & Frhonert Per pp. 331-365. Nordic Academic Press, Lund.

Caestecker, Frank (2003). “The Transformation of Nineteenth-Century West European Expulsion Policy, 1880-1914” in Fahrmeir, Andreas, Olivier Faron and Patrick Weil (2003). *Migration Control in the North Atlantic World. The Evolution of State Practices in Europe and the United States from the French Revolution to the Inter-War Period*. Oxford: Berghahn Books.

Caestecker, Frank (2006). « Histoire de la Migration en Belgique aux XIXe et XXe siècles (1830-2000) » in Khader, Bichara, Marco Martiniello, Andrea Rea, Christiane Timmerman *Penser l’immigration et l’intégration autrement. Une initiative belge inter-universitaire*. Bruylant: Bruxelles.

- Caestecker, Frank, 2015. "Sweden's exceptional ability to organize its immigration" in Byström, Mikael & Pär Frohnert (eds.) *Reaching a State of Hope. Refugees, immigrants and the Swedish welfare state, 1930-2000*. Lund: Nordic Academic Press, pp.331-365.
- Calavita Kitty, (1998), 'Immigration, Law, and Marginalization in a Global Economy: Notes from Spain', *Law & Society Review*, 32(3), pp. 529-566.
- Calavita, Kitty. (1994). "Italy and the New Immigration" in Cornelius, W. A., P. L. Martin and J. F. Hollifield (1994). *Controlling Immigration. A Global Perspective*. Stanford: Stanford University Press.
- Calleman, Catharina and Petra Herzfeld Olsson, eds. 2015. *Arbetskraft från hela världen: Hur blev det med 2008 års reform?* Stockholm: Delmi.
- Callia R., Giuliani M. Luatti L., Pittau F., Ricci R., (2012), *Organisation of asylum and migration policies in Italy*, Translated by Sciallo C., Fuligni, A., and Negulici M., European Migration Network (EMN), Rome.
- Carlier J. and Rea A., (2001), *Les étrangers en Belgique: étrangers, immigrés, réfugiés, sans-papiers?*, in 'Dossiers du CRISP 54'. Brussels, Belgium.
- Carlier J., (1999), *Pour Une Politique migratoire humaine et réaliste en Belgique, Dans L'Europe de Demain*, in 'Annales de Droit de Louvain, 59(3), pp. 223-244.
- Carlier, J-Y. (2006). « L'évolution du droit des étrangers » in in Khader, B., M. Martiniello, A. Rea, C. Timmerman *Penser l'immigration et l'intégration autrement. Une initiative belge inter-universitaire*. Bruylant: Bruxelles.
- Centre pour l'égalité des chances et la lutte contre le racisme (2009) 'La migration des Belges', available at: <https://www.myria.be/files/MigrationdesBelgesFR.pdf>. Accessed: 2023-07-20.
- Chauvin, Sébastien, Garcés-Mascareñas, Blanca & Albert Kraler, 2013. "Working for legality: Employment and Migrant regularization in Europe", *International Migration*, vol.51, no.6, pp.118-131.
- Christensen, Lone B. & Vedsted-Hansen, Jens (red.) (1996). *Udlændingeret. Materialesamling til udlændingeret*. 1. udg. København: Jurist- og Økonomforbundets Forlag.
- Christie A., (2002), 'Asylum Seekers and Refugees in Ireland: Questions of Racism and Social Work' in *Social Work in Europe*, 9(1), pp. 10-17.
- Çinar, D. and H. Waldrauch (1996). "Austria" in Bauböck, R., E. Ersbøll, K. Goenendijk and H. Waldrauch. *Acquisition and Loss of Nationality. Policies and Trends in 15 European States. Volum2 2: Country Analyses*. Amsterdam: Amsterdam University Press.
- CIRE – Coordination et Initiatives pour Réfugiés et Etrangers. *Fiche 05. Histoire de l'Immigration en Belgique au Regard des Politiques Menées*. Available at: <https://web.archive.org/web/20150307051534/https://www.vivrebelgique.be/11-vivre-ensemble/histoire-de-l-immigration-en-belgique-au-regard-des-politiques-menees>. Accessed: 2023-07-20.
- CIS 55 2002= Cirkulæreskrivelse 55, 2002. "Cirkulæreskrivelse om nye retningslinier for optagelse på lovforslag om indfødsrets meddelelse". [Electronic]. Available at: <https://www.retsinformation.dk/eli/mt/2002/55> Accessed: 2023-07-20

- CIS 9799 2018= Cirkulæreskrivelse 9779, 2018. “Cirkulæreskrivelse om naturalisation”. Available at: <https://www.retsinformation.dk/Forms/R0710.aspx?id=203037>. Accessed: 2019-04-30.
- Coenen M., and Lewin R., (1997), *La Belgique et ses Immigrés*, DeBoeck & Larcier, Brussels.
- Coenen, M. T. (1997). « Plaidoyer pour une nouvelle citoyenneté » in Coenen, M. T. and R. Lewin (Ed.) (1997). *La Belgique et ses immigrés*. Bruxelles: Politique et Histoire, De Boeck Université.
- Coenen, M. T. and R. Lewin (Ed.) (1997). *La Belgique et ses immigrés*. Bruxelles: Politique et Histoire, De Boeck Université.
- Colombo A., and Sciortino G., (2004), ‘Italian immigration: the origins, nature and evolution of Italy’s migratory systems’, *Journal of Modern Italian Studies*, 9(1), pp. 49-70.
- Cometti, E. (1958) ‘Trends in Italian emigration’, *The Western Political Quarterly*, 11 (4), 820–34.
- Control of Manufactures Act, (1932), *Number 21 of 1932 Control of Manufactures Act*, Available at [<http://www.irishstatutebook.ie/eli/1932/act/21/enacted/en/html>], Accessed 2018-07-26.
- Control of Manufactures Act, (1964), *Number 40 of 1964 Control of Manufactures Act*, available online at [<http://www.irishstatutebook.ie/eli/1964/act/40/enacted/en/print.html>], Accessed 2018-07-26.
- Costello K. (1990), ‘The Irish Deportation Power’ in *Dublin University Law Journal* ,12, pp. 81-91.
- Council Directive 2001/51/EC, (2001), *Financial penalties on carriers*, Available online at [<https://eur-lex.europa.eu/legal-content/EN/TXT/?uri=LEGISSUM%3A133139>], Accessed 2018-07-26.
- Council of Europe, (2018), *Signatures and ratifications of Treaty 005 Convention for the Protection of Human Rights and Fundamental Freedoms*, [[https://www.coe.int/en/web/conventions/full-list/-/conventions/treaty/005/signatures?p\\_auth=5KWkxQRH](https://www.coe.int/en/web/conventions/full-list/-/conventions/treaty/005/signatures?p_auth=5KWkxQRH)] [Accessed 14/03/2018].
- Coupain, X. (2003). « L’expulsion des étrangers en Belgique (1830-1914) ».
- Daly M., (2001), ‘Irish nationality and citizenship since 1922’ in *Historical Studies* 32(127), pp. 377-40.
- Debono, Daniella, Rönnqvist Sofia, & Karin Magnusson, 2015. *Humane and dignified? Migrants’ experiences of living in a ‘state of deportability’ in Sweden*. Malmö: Malmö University.
- Deloitte Business Consulting (2008). “International rekruttering. Kortlægning af regler, roller, opgaver og forløb.” [Electronic]. Available at: [http://fileadmin.cs.lth.se/luarchive/www.oresund.org/entrepreneurship/content/download/7377/1/424076/file/Deloitte%20International%20rekruttering\\_Kortlaegningsrapporten\\_regler%20et%20novemberpdf.pdf](http://fileadmin.cs.lth.se/luarchive/www.oresund.org/entrepreneurship/content/download/7377/1/424076/file/Deloitte%20International%20rekruttering_Kortlaegningsrapporten_regler%20et%20novemberpdf.pdf). Accessed: 2019-04-30.



Deloitte, 2011. “Comparative Study. Immigration 2010-2011”. [Electronic]. Available at: [https://emnbelgium.be/sites/default/files/publications/deloittecompstudy\\_2010-2011.pdf](https://emnbelgium.be/sites/default/files/publications/deloittecompstudy_2010-2011.pdf). Accessed: 2019-04-25.

DEMIG (2015), *DEMIG POLICY – Belgium*, version 1.3, Online Edition. Oxford: International Migration Institute, University of Oxford. [<https://www.imi-n.org/data/demig-data/demig-policy-1/download-the-data/demig-policy-data-downloads>] Accessed: 2023-07-20.

DEMIG, (2015), *DEMIG POLICY - Norway*, version 1.3, Online Edition. Oxford: International Migration Institute, University of Oxford. [<https://www.imi-n.org/data/demig-data/demig-policy-1/download-the-data/demig-policy-data-downloads>] [Accessed 2018-03-16]

DEMIG, (2015), *DEMIG POLICY – Austria*, version 1.3, Online Edition. Oxford: International Migration Institute, University of Oxford. [<https://www.imi-n.org/data/demig-data/demig-policy-1/download-the-data/demig-policy-data-downloads>] Accessed: 2023-07-20.

DEMIG, (2015), *DEMIG POLICY – Italy*, Version 1.3, Online Edition. Oxford: International Migration Institute, University of Oxford. [<https://www.imi-n.org/data/demig-data/demig-policy-1/download-the-data/demig-policy-data-downloads>] Accessed: 2023-07-20.

DEMIG, (2015a), *DEMIG POLICY –Ireland*, version 1.3, Online Edition. Oxford: International Migration Institute, University of Oxford. [<https://www.imi-n.org/data/demig-data/demig-policy-1/download-the-data/demig-policy-data-downloads>] Accessed: 2023-07-20.

DEMIG, (2015b), *DEMIG POLICY –United Kingdom*, version 1.3, Online Edition. Oxford: International Migration Institute, University of Oxford. [<https://www.imi-n.org/data/demig-data/demig-policy-1/download-the-data/demig-policy-data-downloads>] Accessed: 2023-07-20.

Demokratiezentrum a = Demokratiezentrum, 2015. “Asylum policies in Austria in the European context”. [Electronic]. Available at: <https://web.archive.org/web/20160119184305/http://www.demokratiezentrum.org/en/knowledge/timelines/asylum-policies-in-austria-in-the-european-context.html>. Accessed: 2023-07-20.

Demokratiezentrum, 2015. “Economic migration to Austria during the Second Republic”. [Electronic]. Available at: <https://web.archive.org/web/20190224132654/http://www.demokratiezentrum.org/en/knowledge/timelines/economic-migration-to-austria-during-the-second-republic.html>. Accessed: 2023-07-20.

Deniz Neriman Duru & Hans-Jörg Trenz, 2017. ” From diversity to conviviality: intra-EU mobility and international migration to Denmark in times of economic recession”, *Journal of Ethnic and Migration Studies*, vol.43, no.4, pp.613-632.

Di Muzio G., (2012), *Focus Migration Country Profile no. 23 – Italy*, Institute for Migration Research and Intercultural Studies (IMIS) of the University of Osnabrück, Osnabrück.

Diaz, E. M., F. C. Gallardo and S. Castellani (2012). “Latin America Immigration to Spain”, *Cultural Studies*, 26:6, 814-841.

Dingu-Kyrklund E. (2007), *Citizenship, migration, and social integration in Sweden: a model for Europe?*, in ‘CERIS Working Paper’ No. 52

- Dingu-Kyrklund, E. (2007). "Citizenship, Migration, and Social Integration in Sweden: A model for Europe?" *CERIS Working Paper*, No. 52. Available at: <http://www.temaasyt.se/Documents/Forskning/Citizenship,%20Migration,%20and%20Social%20Integration%20in%20Sweden.pdf> [2015-09-24]
- Donati, S. (2013). *A Political History of National Citizenship and Identity in Italy. 1861-1950*. Stanford: Stanford California Press.
- DPADM & DESA 2006 = Division for Public Administration and Development Management (DPADM) and Department of Economic and Social Affairs (DESA), UN 2006. "Kingdom of Denmark. Public Administration. Country Profile". [Electronic]. Available at: <https://web.archive.org/web/20110912140924/http://unpan1.un.org/intradoc/groups/public/documents/un/unpan023306.pdf>. Accessed: 2023-07-20.
- DR, 2018. "Folketinget har vedtaget lov om ghettøer". News article. 2018-11-22. [Electronic]. Available at: <https://www.dr.dk/ligetil/indland/folketinget-har-vedtaget-lov-om-ghettoer>. Accessed: 2019-04-04.
- Dübeck, I. (1987). "Fremmedrettens udvikling i Danmark 1700-1914" in Blüdnikov, B. (Ed.) (1987). *Fremmede i Danmark. 400 års fremmedpolitik*. Odense: Odense Universitetsforlag.
- E.C. 1612/68 1973 = European Commission, 1973. "General Information on the Community Provisions with regard to Freedom of Movement and Social Security for Workers moving within the Community". Available at: <http://aci.pitt.edu/42793/1/A6524.pdf>. Accessed: 2019-04-30.
- EC 2007/2004 = European Commission, 2004. "COUNCIL REGULATION (EC) No 2007/2004 of 26 October 2004 establishing a European Agency for the Management of Operational Cooperation at the External Borders of the Member States of the European Union". Brussels: European Commission. Available at: <https://eur-lex.europa.eu/eli/reg/2004/2007/oj>. Accessed: 2019-04-25.
- EG 2725/2000 = Rådets Förordning (EG) nr 2725/2000, 2000. "Rådets förordning om inrättande av Eurodac för jämförelse av fingeravtryck för en effektiv tillämpning av Dublinkonventionen". [Electronic]. Available at: <https://eur-lex.europa.eu/LexUriServ/LexUriServ.do?uri=OJ:L:2000:316:0001:0010:SV:PDF>. Accessed: 2019-04-02.
- Ehmer et al. 2001. "Migration Patterns in Late Imperial Austria". Österreichische Akademie der Wissenschaften. Working Paper Number 3. Available at: [https://web.archive.org/web/20150830001311/http://www.oeaw.ac.at/kmi/Bilder/kmi\\_WP3.pdf](https://web.archive.org/web/20150830001311/http://www.oeaw.ac.at/kmi/Bilder/kmi_WP3.pdf) Accessed: 2023-07-20.
- Ehmer, J. (2000). "Tramping Artisans in Nineteenth-Century Vienna" in Siddle, S. J. *Migration, Mobility and Modernization*, pp. 164-185, Liverpool University Press, Liverpool.
- Ehmer, J. (2000). "Tramping Artisans in Nineteenth-Century Vienna" in Siddle, S. J. *Migration, Mobility and Modernization*. Liverpool: Liverpool University Press. Pp. 164-185.
- Elden J. C., (2017), *Religionsfrihet*, in 'Store Norske Leksikon', [<https://snl.no/religionsfrihet>] [Accessed 2018-03-14].
- Emergency Powers Act, (1939), *Emergency Powers Act Number 28 of 1939*, available online at [<http://www.irishstatutebook.ie/eli/1939/act/28/enacted/en/print#sec2>], Accessed 2018-07-26.

Emigrationsutredningen & Wohlin, N. (1908). *Emigrationsutredningen. Bil. 1, Utvandringslagstiftning: öfversikt af dess utveckling och nuvarande beskaffenhet i Europas olika stater*. Stockholm: Nordiska bokh.

EMN & IOM, 2004. "Migration and Asylum in Europe 2004. Austria". [Electronic]. Available at: [https://www.emn.at/wp-content/uploads/2016/12/ASR\\_2004\\_AT.pdf](https://www.emn.at/wp-content/uploads/2016/12/ASR_2004_AT.pdf). Accessed: 2019-05-15.

EMN & IOM, 2005. "Policy report, Immigration and integration in Austria. Reference period 1 July 2004 – 31 December 2005". [Electronic]. Available at: [https://www.emn.at/wp-content/uploads/2016/12/EMN\\_AT\\_Annual\\_Policy\\_Report\\_2004-2005.pdf](https://www.emn.at/wp-content/uploads/2016/12/EMN_AT_Annual_Policy_Report_2004-2005.pdf). Accessed: 2019-05-15.

EMN & IOM, 2008. "Small-scale study IV. Family Reunification in Austria", [Electronic]. Available at: [https://www.emn.at/wp-content/uploads/2017/01/AT\\_EMN\\_NCP\\_Small-Scale\\_Study\\_IV\\_Family\\_Reunification\\_FINAL.pdf](https://www.emn.at/wp-content/uploads/2017/01/AT_EMN_NCP_Small-Scale_Study_IV_Family_Reunification_FINAL.pdf).

EMN =European Migration Network, 2008. "Belgian Policy Report on Asylum and Migration 2006". [Electronic]. Available at: <https://emnbelgium.be/publication/annual-policy-report-2006-emn>. Accessed: 2023-07-20.

EMN =European Migration Network, 2012. "Annual Policy Report 2011 Policy report regarding asylum and migration: Belgium". [Electronic]. Available at: [https://emnbelgium.be/sites/default/files/publications/annual\\_policy\\_rapport\\_2011\\_definitief.pdf](https://emnbelgium.be/sites/default/files/publications/annual_policy_rapport_2011_definitief.pdf). Accessed: 2023-07-20.

EMN =European Migration Network, 2015. "Annual Report on Asylum and Migration Policy in Belgium 2014" [Electronic]. Available at: <https://emnbelgium.be/publication/annual-report-asylum-and-migration-policy-belgium-2014-emn>. Accessed: 2023-07-20.

EMN 2012 = European Migration Network, 2012. "Country Factsheet: Denmark 2012". [Electronic]. Available at: [https://web.archive.org/web/20190723104458/https://ec.europa.eu/home-affairs/sites/homeaffairs/files/what-we-do/networks/european\\_migration\\_network/reports/docs/country-factsheets/country\\_factsheet\\_denmark\\_2012\\_\(en\)-\\_400023\\_en.pdf](https://web.archive.org/web/20190723104458/https://ec.europa.eu/home-affairs/sites/homeaffairs/files/what-we-do/networks/european_migration_network/reports/docs/country-factsheets/country_factsheet_denmark_2012_(en)-_400023_en.pdf). Accessed: 2023-07-20.

EMN 2013= European Migration Network, 2013. "Country Factsheet: Denmark 2013". [Electronic]. Available at: [https://web.archive.org/web/20190723104512/https://ec.europa.eu/home-affairs/sites/homeaffairs/files/what-we-do/networks/european\\_migration\\_network/reports/docs/country-factsheets/07.denmark\\_emn\\_country\\_factsheet\\_2013.pdf](https://web.archive.org/web/20190723104512/https://ec.europa.eu/home-affairs/sites/homeaffairs/files/what-we-do/networks/european_migration_network/reports/docs/country-factsheets/07.denmark_emn_country_factsheet_2013.pdf). Accessed: 2023-07-20.

EMN 2016a= EMN, European Migration Network, 2016. "Country factsheet: Belgium 2016". [Electronic]. Available at: [https://emnbelgium.be/sites/default/files/publications/02a\\_belgium\\_country\\_factsheet\\_en.pdf](https://emnbelgium.be/sites/default/files/publications/02a_belgium_country_factsheet_en.pdf). Accessed: 2023-07-20.

EMN 2016b = EMN, European Migration Network, 2016. “Resettlement and humanitarian admission in Belgium”. [Electronic]. Available at: [https://emnbelgium.be/sites/default/files/publications/Resettlement%20and%20Humanitarian%20Admission%20in%20Belgium%20dec2016\\_0.pdf](https://emnbelgium.be/sites/default/files/publications/Resettlement%20and%20Humanitarian%20Admission%20in%20Belgium%20dec2016_0.pdf). Accessed: 2019-02-27.

EMN 2017a = EMN, European Migration Network, 2017. “Country factsheet: Belgium 2017”. [Electronic] Available at: <https://emnbelgium.be/publication/country-factsheet-belgium-2017-emn>. Accessed: 2023-07-20.

EMN 2017b= EMN, European Migration Network, 2017. “Annual Report on Asylum and Migration Policy in Belgium and in the EU in 2016”. [Electronic]. Available at: <https://emnbelgium.be/publication/annual-report-asylum-and-migration-policy-belgium-and-eu-2016-emn>. Accessed: 2023-07-20.

EMN Sweden, 2014. “The use of detention and alternatives to detention in the context of immigration policies in Sweden”, [Electronic], Available at: [https://home-affairs.ec.europa.eu/system/files/2020-09/27a-sweden\\_detention\\_study\\_august2014\\_en.pdf](https://home-affairs.ec.europa.eu/system/files/2020-09/27a-sweden_detention_study_august2014_en.pdf). Accessed: 2023-07-20.

EMN, (2015), *The Organization of Asylum And Migration Policies In Austria*, International Organization for Migration, Country Office for Austria, Vienna.

EMN, (2016), *Resettlement and Humanitarian Admission Programmes In Europe – What Works? Spain 2016*, European Commission.

EMN, 2004. “The Impact of Immigration on Austria’s Society”. Available at: [https://www.emn.at/wp-content/uploads/2017/01/Impact\\_on\\_AT\\_AT.pdf](https://www.emn.at/wp-content/uploads/2017/01/Impact_on_AT_AT.pdf). Accessed: 2019-05-15.

EMN, 2007. “Norway”. [Electronic]. Available at: <https://web.archive.org/web/20190306062437/https://www.resettlement.eu/country/norway>. Accessed: 2023-07-20.

EMN, 2007. “Policy report, Immigration and integration in Austria. Reference period 1 January – 31 December 2007”. [Electronic]. Available at: [https://www.emn.at/wp-content/uploads/2016/12/APR\\_2007\\_AT.pdf](https://www.emn.at/wp-content/uploads/2016/12/APR_2007_AT.pdf). Last accessed: 2019-05-15.

EMN, 2014. “Country Factsheet: Sweden 2014”, [Electronic], Available at: [https://web.archive.org/web/20190723104429/https://ec.europa.eu/home-affairs/sites/homeaffairs/files/what-we-do/networks/european\\_migration\\_network/reports/docs/country-factsheets/27.sweden\\_emn\\_country\\_factsheet\\_2014.pdf](https://web.archive.org/web/20190723104429/https://ec.europa.eu/home-affairs/sites/homeaffairs/files/what-we-do/networks/european_migration_network/reports/docs/country-factsheets/27.sweden_emn_country_factsheet_2014.pdf). Accessed: 2023-07-20.

EMN, 2016. “Austria Annual Policy Report 2015”. [Electronic]. Available at: <https://www.emn.at/wp-content/uploads/2016/12/Annual-Policy-Report-Austria-3.pdf>. Accessed: 2023-07-20.

EMN, 2015. “EMN Annual Report on Immigration and Asylum 2014”, [Electronic] Available at: [https://emnbelgium.be/sites/default/files/publications/00\\_emn\\_annual\\_report\\_on\\_immigration\\_and\\_asylum\\_synthesis\\_report-1.pdf](https://emnbelgium.be/sites/default/files/publications/00_emn_annual_report_on_immigration_and_asylum_synthesis_report-1.pdf). Accessed: 2019-06-16.

EMN, 2017. “Country Factsheet: Norway 2017”. [Electronic]. Available at: <https://www.regjeringen.no/contentassets/59c035d6145c48a59d834ce1969f33cb/emn-country-factsheet-norway.pdf>. Accessed: 2019-04-26.

EMN, 2017. “The organization of asylum and migration politics in Austria”. [Electronic]. Available at: [https://www.emn.at/wp-content/uploads/2017/01/organisation-study\\_AT-EMN-NCP\\_2016.pdf](https://www.emn.at/wp-content/uploads/2017/01/organisation-study_AT-EMN-NCP_2016.pdf). Accessed: 2019-05-15.

EMN, 2019. “Annual Report 2018 on Migration and Asylum in Austria”, [Electronic]. Available at: [https://www.emn.at/wp-content/uploads/2019/03/arma-2018\\_national-report-austria-part-1\\_en\\_final.pdf](https://www.emn.at/wp-content/uploads/2019/03/arma-2018_national-report-austria-part-1_en_final.pdf). Accessed: 2019-05-15.

Ericsson M, (2016), *Historisk forskning om rasism och främlingsfientlighet i Sverige. – en analyserande kunskapsöversikt*, Forum för levande historia. Stockholm.

Ermacora M., (2007), ‘Assistance and Surveillance: War Refugees in Italy 1914–1918’, *Contemporary European History*, 16(4), pp. 445–459.

ERN = European Resettlement Network, 2013. “Sweden”, [Electronic], Available at: <https://web.archive.org/web/20170223172315/https://www.resettlement.eu/country/sweden> . Accessed: 2023-07-20.

ERN = European Resettlement Network. “Denmark” [Electronic]. Available at: <https://web.archive.org/web/20170223140757/http://www.resettlement.eu/country/denmark>. Accessed: 2023-07-20.

ERN = European Resettlement Network. “Austria”. [Electronic]. Available at: <https://web.archive.org/web/20220119084756/http://www.resettlement.eu/country/austria>. Accessed: 2023-07-20.

Ersbøll Eva, 2015. *EUDO citizenship observatory report on Citizenship Law: Denmark* [Electronic]. Available at: [https://cadmus.eui.eu/bitstream/handle/1814/36504/EUDO\\_CIT\\_CR\\_2015\\_14\\_Denmark.pdf](https://cadmus.eui.eu/bitstream/handle/1814/36504/EUDO_CIT_CR_2015_14_Denmark.pdf). Accessed: 2023-07-20.

European Commission b. “Member States’ notifications of the temporary reintroduction of border control at internal borders pursuant to Article 25 and 28 et seq. of the Schengen Borders Code”. [Electronic]. Available at: <https://home-affairs.ec.europa.eu/system/files/2023-07/Full%20list%20of%20MS%20notifications%20of%20the%20temporary%20reintroduction%20of%20border%20control%20at%20internal%20borders.pdf>. Accessed: 2023-07-20.

European Commission, 2017. “Relocation: EU solidarity between member states”. Available at: [https://home-affairs.ec.europa.eu/system/files/2017-11/20171114\\_relocation\\_eu\\_solidarity\\_between\\_member\\_states\\_en.pdf](https://home-affairs.ec.europa.eu/system/files/2017-11/20171114_relocation_eu_solidarity_between_member_states_en.pdf). Accessed: 2023-07-20.

European Commission. “Resettlement and legal migration. The Commission’s contribution to the leader’s agenda”. [Electronic]. Available at: <https://home->

[affairs.ec.europa.eu/system/files/2020-09/20171207\\_resettlement\\_and\\_legal\\_migration\\_en.pdf](https://affairs.ec.europa.eu/system/files/2020-09/20171207_resettlement_and_legal_migration_en.pdf). Accessed: 2023-07-20.

European Council, 1994. "Council Resolution of 20 June 1994 on limitation on admission of third-country nationals to the territory of the Member States for employment". [Electronic], Available at: <https://ec.europa.eu/migrant-integration/librarydoc/council-resolution-of-20-june-1994-on-limitation-on-admission-of-third-country-nationals-to-the-territory-of-the-member-states-for-employment>. Accessed: 2019-06-16.

European Resettlement Network, (2007) Finland. Accessed on: <https://web.archive.org/web/20170802113623/http://www.resettlement.eu/country/finland> Accessed: 2023-07-20.

Eurostat. 2018. "Archive: Public Employment – Danmark". [Electronic]. Available at: [https://ec.europa.eu/eurostat/statistics-explained/index.php?title=Archive:Public\\_employment\\_-\\_Denmark&oldid=368803](https://ec.europa.eu/eurostat/statistics-explained/index.php?title=Archive:Public_employment_-_Denmark&oldid=368803). Accessed 2019-03-25.

Fahrmeir, A. (2000). *Citizens and Aliens. Foreigners and the Law in Britain and the German States 1789-1870*.

Falbe-Hansen, V.: "Udvandringen i vor Tid" (*Nationaløkonomisk Tidsskrift*, Bd. 1, rk. 1; 1873) [http://img.kb.dk/tidsskriftdk/pdf/nto/nto\\_frk\\_0001-PDF/nto\\_frk\\_0001\\_90166.pdf](http://img.kb.dk/tidsskriftdk/pdf/nto/nto_frk_0001-PDF/nto_frk_0001_90166.pdf)

Farbøl, Rosanna, Elkjær Sørensen, Astrid, Borring Olesen, Thorsten & Niels Wium Olesen, 2018. "Dansk indvandrings- og udlændingepolitik, 1970-1992". [Electronic]. Available at: <https://danmarkshistorien.dk/leksikon-og-kilder/vis/materiale/dansk-indvandrings-og-udlaendingepolitik-1970-1992/>. Accessed 2019-04-02.

Fassman, H. (1994). "Emigration, Immigration and Internal Migration in the Austro-Hungarian Monarchy, 1910" in *Roots of the Translated. Volume One. Late 19<sup>th</sup> Century East Central and Southeastern Europe*. Hoerder, D. and Blank, I. East European Monographs, Boulder distributed by Columbia University Press, New York. Pp. 253-311.

Fassmann, H. and Münz, R. (1994). "Austria: A country of Immigration and Emigration" in Fassmann, H. and Münz, R. (ed.). *European Migration in the Late Twentieth Century. Historical Patterns, Actual Trends, and Social Implications*. Laxenburg: IIASA, International Institute for Applied Systems Analysis. Pp. 149-169.

Fassmann, H., & Reeger U., (2008), *Austria: From guest worker migration to a country of immigration*, IDEA Working Paper Nr. 1 November.

Fassmann, Heinz, & Ursula Reeger, 2008. "Austria: From guest worker migration to a country of immigration," IDEA Working Paper, no. 1.

FEDASIL, (2018), History, [\[https://web.archive.org/web/20180904065436/https://www.fedasil.be/en/resettlement/history\]](https://web.archive.org/web/20180904065436/https://www.fedasil.be/en/resettlement/history), Accessed 2018-04-04]

Federal Law Gazette 140/11 = Bundesgesetzblatt 140/2011. *Bundesgesetz, mit dem das Beamten-Dienstrechtsgesetz 1979, das Gehaltsgesetz 1956, das Vertragsbedienstetengesetz 1948, das Richter- und Staatsanwaltschaftsdienstgesetz, das Landeslehrer-Dienstrechtsgesetz, das land- und forstwirtschaftliche Landeslehrer- Dienstrechtsgesetz, das Land- und*

*Forstarbeiter-Dienstrechtsgesetz, die Reisegebührenvorschrift 1955, das Bundes-Gleichbehandlungsgesetz, das Pensionsgesetz 1965, das Bundestheaterpensionsgesetz, das Bundesbahn-Pensionsgesetz, das Ausländerzulagen- und -hilfeleistungsgesetz, das Bundes-Personalvertretungsgesetz und das Asylgerichtshofgesetz geändert werden und die Verordnung des Bundeskanzlers vom 29. Februar 1980 betreffend die Prüfung und die Klausurarbeiten für den Aufstiegskurs an der Verwaltungsakademie wieder in Kraft gesetzt und geändert wird (Dienstrechts-Novelle 2011).* Available at: [https://www.ris.bka.gv.at/Dokumente/BgblAuth/BGBLA\\_2011\\_I\\_140/BGBLA\\_2011\\_I\\_140.pdf](https://www.ris.bka.gv.at/Dokumente/BgblAuth/BGBLA_2011_I_140/BGBLA_2011_I_140.pdf). Accessed: 2019-05-08.

Federal Law Gazette 26/69 = Bundesgesetzblatt 26/1969. *Abkommen zwischen Österreich und Spanien über die Anwerbung spanischer Arbeitskräfte und deren Beschäftigung in Österreich.* Available at: [https://www.ris.bka.gv.at/Dokumente/BgblPdf/1969\\_26\\_0/1969\\_26\\_0.pdf](https://www.ris.bka.gv.at/Dokumente/BgblPdf/1969_26_0/1969_26_0.pdf). Accessed: 2019-05-07.

Federal Law Gazette 289/66 = Bundesgesetzblatt 289/1966. *Abkommen zwischen der Republik Österreich und der Sozialistischen Föderativen Republik Jugoslawien über Soziale Sicherheit.* Available at: [https://www.ris.bka.gv.at/Dokumente/BgblPdf/1966\\_289\\_0/1966\\_289\\_0.pdf](https://www.ris.bka.gv.at/Dokumente/BgblPdf/1966_289_0/1966_289_0.pdf). Accessed: 2019-05-07.

Federal Law Gazette 333/79= Bundesgesetzblatt 333/1979. *Bundesgesetz vom 27. Juni 1979 über das Dienstrecht der Beamten (Beamten- Dienstrechtsgesetz 1979 — BDG 1979).* Available at: [https://www.ris.bka.gv.at/Dokumente/BgblPdf/1979\\_333\\_0/1979\\_333\\_0.pdf](https://www.ris.bka.gv.at/Dokumente/BgblPdf/1979_333_0/1979_333_0.pdf)  
[Federal Law Gazette 450/90 =](#)

Federal Law Gazette 337/69 = Bundesgesetzblatt 337/1969. *Abkommen zwischen der Republik Österreich und der Türkischen Republik über Soziale Sicherheit samt Schlußprotokoll.* Available at: [https://www.ris.bka.gv.at/Dokumente/BgblPdf/1969\\_337\\_0/1969\\_337\\_0.pdf](https://www.ris.bka.gv.at/Dokumente/BgblPdf/1969_337_0/1969_337_0.pdf). Accessed: 2019-05-07.

Federal Ministry Defence. *1955-2005: Austria's Armed Forces at 50.* [Electronic]. Available at: <https://web.archive.org/web/20090818185418/https://www.bundesheer.at/english/dynmod/artikel.php?id=1489>. Accessed: 2023-07-20.

Finish Aliens Act of 1991, (2001), *The Finish Aliens Act 22.2 1991/378* [with subsequent amendment 1993-2002], Unofficial English translation by UVI.

Finotelli C., and Sciortino F., (2009), 'The Importance of Being Southern: The Making of Policies of Immigration Control in Italy', *European Journal of Migration and Law 11*, pp. 119-138.

FitzGerald, D. and Cook-Martín, D. (2014). *Culling the masses: the democratic origins of racist immigration policy in the Americas.* Cambridge: Harvard University Press.

Foblets, Marie-Claire & Sander Loones, 2006. "Belgium" in Rainer Bauböck, Ersbøll, Eva, Groenendijk, Kees & Harald Waldrauch (eds) *Acquisition and Loss of Nationality. Volume 2: Country Analyses: Policies and trends in 15 European states.* Amsterdam University Press., pp.63-104.

Foblets, Marie-Clarie & Zeynep Yanasmayan, 2013. "Country Report: Belgium". EUDO Citizenship Observatory. [Electronic]. Available at: [https://cadmus.eui.eu/bitstream/handle/1814/19603/RSCAS\\_EUDO\\_CIT\\_2013\\_27.pdf?sequence=3&isAllowed=y](https://cadmus.eui.eu/bitstream/handle/1814/19603/RSCAS_EUDO_CIT_2013_27.pdf?sequence=3&isAllowed=y). Accessed: 2023-07-20.

Florence, Eric & Marco Martiniello, 2005. "Social science research and Public Policies: the case of immigration in Belgium," *International Journal on Multicultural Societies*, vol. 7, no. 1, pp.49-67.

Folketinget, 2018. "Forslag til Lov om ændring af lov om dansk indfødsret og lov om danskuddannelse til voksne udlændinge m.fl." [Electronic]. Available at: [https://www.ft.dk/ripdf/samling/20181/lovforslag/180/20181\\_180\\_som\\_vedtaget.pdf](https://www.ft.dk/ripdf/samling/20181/lovforslag/180/20181_180_som_vedtaget.pdf). Accessed: 2019-04-30.

Folketinget. "Grundlovens Paragraf 27". [Electronic]. Available at: <https://www.ft.dk/da/dokumenter/bestil-publikationer/publikationer/ningrundlov/mingrundlov/kapitel-3/paragraf-27>. Accessed: 2019-04-30.

Frank, Denis, 2005. *Staten, företagen och arbetskraftsinvandringen – en studie av invandringspolitiken i Sverige och rekryteringen av utländska arbetare 1960–1972*. Växjö: Växjö University Press.

Frank, Denis, 2017. "Förändringar i svensk arbetskraftsinvandringspolitik 1954–2014", *Arbetsmarknad & Arbetsliv*, vol.23, no.1, pp.64-81.

Freedom House, 2001. "Austria", [Electronic]. Available at: [https://freedomhouse.org/sites/default/files/2020-02/Freedom\\_in\\_the\\_World\\_2001-2002\\_complete\\_book.pdf](https://freedomhouse.org/sites/default/files/2020-02/Freedom_in_the_World_2001-2002_complete_book.pdf). Accessed: 2023-07-20.

Freedom House. "Denmark, 2014". [Electronic]. Available at: [https://freedomhouse.org/sites/default/files/2020-02/Freedom\\_in\\_the\\_World\\_2014\\_complete\\_book.pdf](https://freedomhouse.org/sites/default/files/2020-02/Freedom_in_the_World_2014_complete_book.pdf). Accessed: 2023-07-20.

Freeman, G. P. (1995). "Modes of Immigration Politics in Liberal Democratic States", *The International Migration Review*, Vol. 29, No. 4 (Winter, 1995), pp. 881-902.

Freeman, G. P. (1995). "Modes of Immigration Politics in Liberal Democratic States." *The International Migration Review*, Vol. 29, No. 4 (Winter, 1995), pp. 881-902.

Frizzera, F., (2017), 'Refugees (Austria-Hungary) - 1914-1918' in *The International Encyclopedia of the First World War*, ed. by Daniel U., Gatrell P., Janz O, Jones H, Keene J, Kramer A. & Nasson B, issued by Freie Universität Berlin

Gächter, August, 2008. "Migrationspolitik in Österreich seit 1945", *Arbeitspapiere Migration und soziale Mobilität*, no. 12.

García Oliva, J. (2008). "Religious Freedom in Transition: Spain." *Religion, State and Society*, 36:3, pp. 269-281.



Gevert KK., (2013), *A foreign element in the nation*, in 'Reaching a State of Hope', ed., Byström M. & Frhoner P., pp. 54-69. Nordic Academic Press, Lund.

Geverts KK., (2008), *Ett främmande element i nationen - Svensk flyktingpolitik och de judiska flyktingarna 1938–1944*, Dissertation at Uppsala University.

Ghosh, Flora & Søren Juul, 2008. "Lower benefits to the Refugees in Denmark: Missing Recognition", *Social Work and Society*, vol. 6, no.1, pp.88-105.

Gjergji, I., (2006), *Il trattenimento dello straniero in attesa di espulsione: una 'terra di nessuno' tra ordine giuridico e fatto politico* in 'Costituzionalismo' vol. 3(1), pp. 1-45.

Global Detention Project 2018. "Norway Immigration Detention", [Electronic], Available at: <https://www.globaldetentionproject.org/countries/europe/norway>. Accessed: 2019-06-16.

Global detention project 2018. "Harm reduction in immigration detention: a comparative study of detention centres in France, Germany, Norway, Sweden and Switzerland", Commissioned by the Norwegian Red Cross, [Electronic], Available at: <https://reliefweb.int/report/norway/global-detention-project-harm-reduction-immigration-detention-comparative-study>. Accessed: 2023-07-20.

Globalcit, 2019. "Austria raises naturalisation requirement for refugees from six to ten years". News article. 2018-08-13. [Electronic] Available at: <http://globalcit.eu/austria-raises-naturalisation-requirement-for-refugees-from-six-to-ten-years/>. Accessed: 2019-05-02.

Globalcit, 2019. "New rules on deprivation of citizenship in Norway", News article. 2018-09-18. [Electronic], Available at: <http://globalcit.eu/new-rules-on-deprivation-of-citizenship-in-norway/>. Accessed: 2019-04-28.

Godderis, I. (2000). *The First Years of Belgian Alien Policy. Decentralization Measures and Government Relief for Polish Refugees in the 1830's*. Article received from the author.

Godin, Marie, 2013. "Domestic work in Belgium: Crossing Boundaries between Informality and Formality" in eds. Triandafyllidou Anna (ed.) *Irregular Migrant Domestic Workers in Europe. Who Cares?* Farnham: Ashgate pp.17-42.

Graf, Maximilian, & Sarah Knoll, 2017. "In transit or Asylum Seekers? Austria and the Cold War Refugees from the Communist Block" in Bischof, Günter & Rupnow, Kirk (eds.) *Migration in Austria*, Contemporary Austrian Studies Vol 26., Innsbruck University Press: Innsbruck, pp. 91-112.

Grahl-Madsen, Alte, 2001. *The Land Beyond: Collected Essays on Refugee Law and Policy*. The Hague: Martinus Nijhoff Publishers.  
Grunnlov, 1814.

Grødem, Anne Skevik, 2017. "Family-oriented policies in Scandinavia and the challenge of migration", *Journal of European Social Policy*, vol.27, no. 1, pp.77-89.

Grønbjerg Christiansen, H., 1987.: "Dansk udvandringspolitik i mellemkrigsårene: Visioner og resultater" (*Historie/Jyske Samlinger*, Ny række, Bind 17)

- Gsir, S., J.M Lafleur, & M Stanek, 2016. "Migration policy reforms in the context of economic and political crises: the case of Belgium", *Journal of Ethnic & Migration Studies*, vol.42, no.10, pp.1651–1669.
- Hague Academy of International Law (1925-). *Recueil des cours*. The Hague: Nijhoff.  
Available at:  
<https://books.google.se/books?id=34Czpk5LurEC&pg=PA187&lpg=PA187&dq=passeport+interne+italie&source=bl&ots=tDW2goVm6b&sig=WapzgL6eF890wz8WxWk8qOO93wA&hl=sv&sa=X&ved=0ahUKewijhaTBIPrKAhXHDSwKHYSJDZIQ6AEIQDAF#v=onepage&q=italie&f=false> [2016-02-15]
- Hambro E., (1950), *Norsk Fremmedrett*, Gyldendal Norsk Forlag, Oslo.
- Hammar T., (1964), *Sverige åt svenskarna – invandringspolitik, utlänningskontroll och asylrätt 1900-1932.*, Caslon Press. Stockholm.
- Handoll J., (2012), *EUDO Citizenship Observatory – Country Report Ireland*, European University Institute, Florence.
- Hansen, R. and P. Weil (2001). *Towards a European Nationality. Citizenship, Immigration and Nationality Law in the EU*. New York: Palgrave.
- Haváč, Ondřej, 2016. "Czech Refugees in Austria 1968-1985", *Prague Papers on History of International Relations*, no.1, pp.82-97.
- Healy, M. (2002). "Becoming Austrian: Women, the State, and Citizenship in World War I", *Central European History*, 35(1), 1-35.
- Hedetoft, Ulf, 2006. "Integrating Immigrants into a Homogenous Welfare State". [Electronic]. Available at: <https://www.migrationpolicy.org/article/denmark-integrating-immigrants-homogeneous-welfare-state>. Accessed: 2023-07-20.
- Heiss, G. (1995), 'Ausländer, Flüchtlinge, Bolschewiken: Aufenthalt und Asyl 1918-1933', in Heiss G., & Rathkolb O. (eds.), *Asylland wider Willen. Flüchtlinge in Österreich im europäischen Kontext seit 1914*, 86-108. Vienna: J&V. Edition Wien, Dachs Verlag.
- Herlitz, Anders & Eva Singer, 2013. "KNOW RESET – Country profile Denmark". [Electronic]. Available at: [http://www.know-reset.eu/files/texts/00149\\_20130705130055\\_knowresetcountryprofiledenmark.pdf](http://www.know-reset.eu/files/texts/00149_20130705130055_knowresetcountryprofiledenmark.pdf). Accessed: 2019-04-30.
- Herzog-Punzenberger, B. (2003). "Ethnic Segmentation in School and Labor Market – 40 Year Legacy of Austrian Guestworker Policy". *International Migration Review*. V. 37, Nr. 4, pp. 1120-1144.
- Herzog, T. (2003). *Defining Nations. Immigrants and Citizens in Early Modern Spain and Spanish America*. New Haven & London: Yale University Press.
- Hirschhausen, von U. "From imperial inclusion to national exclusion: citizenship in the Habsburg monarchy and in Austria 1867–1923." *European Review of History: Revue européenne d'histoire*. 16:4, 551-573.

- Hofverberg, Elin, 2016. “Denmark: Law to Stem Asylum-Based Immigration”. [Electronic]. Available at: <https://web.archive.org/web/20160224130257/http://www.loc.gov/law/foreign-news/article/denmark-law-to-stem-asylum-based-immigration/>. Accessed: 2023-07-20.
- Hofverberg, Elin, 2016. “Denmark” in *Refugee Law and Policy in Selected countries.*, pp.62-71. The Law Library of Congress, LL File No. 2016-013014. Available at: <https://web.archive.org/web/20210505061947/https://www.loc.gov/law/help/reports/pdf/2016-013014.pdf>. Accessed: 2023-07-19.
- Hofverberg, Elin, 2016. “Sweden” in *Refugee Law and Policy in Selected countries*, pp.235-246 The Law Library of Congress, LL File No. 2016-013014. [Electronic]. Available at: <https://web.archive.org/web/20210505061947/https://www.loc.gov/law/help/reports/pdf/2016-013014.pdf>. Accessed: 2023-07-19
- Homann, G. (2006). “Udvisning” in *Udlændingeret*. 3 ed. Copenhagen: Jurist- og Økonomforbundets Forlag.
- Horvath K., (2016), ‘Die unbekanntenen Pfade der Migrationspolitik: Historische, methodische und theoretische Wissenslücken in der Analyse migrationspolitischer Transformationsprozesse’ in *Österreich Z Soziol*, 2(41), pp. 15-36.
- Horvath, Kenneth, 2014. “Policing the Borders of the 'Centaur State': Deportation, Detention, and Neoliberal Transformation Processes—The Case of Austria”, *Social Inclusion*, vol.2, no.3, pp.113-123.
- House of Commons (1893). Miscellaneous. No3. *Nationality and Naturalization. Reports by Her Majesty's Representatives Abroad upon the Laws of Foreign Countries.*
- Hvidt, K. (1976). *Danske veje vestpå – en bok om udvandringen til Amerika*. Copenhagen: Politikens forlag.
- Hvidt, K. (1980). “Denmark” in *Les migrations internationales de la fin du XIIIe siècle à nos jours*. Paris: Centre National de la Recherche Scientifique.
- Hvidtfeldt, Camilla & Marie Louise Schultz-Nielsen, 2017. “Flygtninge og asylansøgere I Danmark 1992–2016“. Rockwool Fondens Forskningsenhed: København.
- Hviid, Kirsten, Flemming, Wridt Jensen, Olesen, Kasper & Mari-Ann Flyvholm, 2010.” Rekruttering af udenlandsk arbejdskraft: Indvandreres arbejdsmiljø og tilknytning til arbejdsmarkedet i Danmark”. Copenhagen: Det Nationale Forskningscenter for Arbejdsmiljø.
- Jensen, Bent, 2001.” Foreigners in the Danish newspaper debate from the 1870s to the 1990s.” Copenhagen: The Rockwool Foundation Research Unit.
- Illuzzi J., (2014), *Gypsies in Germany and Italy 1861-1914 – Life Outside the Law*, Palgrave Macmillan, Houndmills, Basingstoke, Hampshire.
- Inlandarbeiterschutzgesetz 1925, (1966), Original legal text: <http://alex.onb.ac.at/cgi-content/alex?aid=bgb&datum=19250004&seite=00001964>, [Accessed 2018-06-12]
- Irish Free State Constitution, (1922), *Constitution of the Irish Free State (Saorstát Eireann) Act of 1922*, Available at [<http://www.irishstatutebook.ie/eli/1922/act/1/enacted/en/print>], Accessed 2018-07-26.
- Jandl, Michael & Albert Kraler (2003). “Austria: A country of Immigration?”, [Electronic].

- Jandl, Michael, Hollomey, Christina, Gendera, Sandra, Stepien, Anna & Veronika Bilger, 2009. *Migration and Irregular Work in Austria: A Case Study of the Structure and Dynamics of Irregular Foreign Employment in Europe at the Beginning of the 21st Century*. Amsterdam: Amsterdam University Press.
- Janoski, T. (2009). "The difference that empire makes: Institutions and politics of citizenship in Germany and Austria." *Citizenship Studies*, 13:4, 381-411.
- Jensen, A. (1904). "Udvandring". [http://img.kb.dk/tidsskriftdk/pdf/nto/nto\\_3rk\\_0012-PDF/nto\\_3rk\\_0012\\_85033.pdf](http://img.kb.dk/tidsskriftdk/pdf/nto/nto_3rk_0012-PDF/nto_3rk_0012_85033.pdf)
- Johansen, H. C. (2002). *Danish population history*. Odense: University Press of Southern Denmark.
- Jønsson Heidi Vad & Klaus Petersen, 2012. "Denmark: A National Welfare State Meets the World." In Brochmann, Grete & Anniken Hagelund (eds), *Immigration Policy and the Scandinavian Welfare State 1945–2010*. Palgrave Macmillan, London, pp.97-142.
- Jørgensen, Martin Bak & Trine Lund Thomsen, 2013. "Crises Now and Then—Comparing Integration Policy Frameworks and Immigrant Target Groups in Denmark in the 1970s and 2000s", *Journal of International Migration and Integration*, vol.14, no. 2, pp.245-262.
- Josipovic, Ivan & Ursula Reeger, 2019. "Country report- Austria. Legal and Policy Framework of Migration Governance". Respond working papers. Available at: <http://www.diva-portal.org/smash/get/diva2:1248261/FULLTEXT01.pdf>. Accessed: 2019-05-15.
- Joyce, Patrick, 2017. "Inspiration för integration – en ESO-rapport om arbetsmarknadspolitik för nyanlända i fem länder". Regeringskansliet. Available at: [https://eso.expertgrupp.se/wp-content/uploads/2017/12/171123-ESO-2017\\_7-korr-171215.pdf](https://eso.expertgrupp.se/wp-content/uploads/2017/12/171123-ESO-2017_7-korr-171215.pdf). Accessed: 2019-04-30.
- Kagné B., (1998), *Représentations de l'immigration en Belgique*, in *Quadreni* 36(3), pp. 97-111.
- Kauppinen, Ilpo & Panu Poutvaara, 2011. "Family Migration and Policies: Lessons from Denmark", *CESifo DICE Report*, vol.9, no.4, pp.37–40.
- Kaveh C., (2016), "*Omstreiferuvæsenet*": *Politiets og domstolenes behandling av tatere og sigøynere 1900–1960*. Avhandling for graden Philosophiae Doctor Det humanistiske fakultet, Universitetet i Oslo.
- Kay D., (1995), *The Resettlement of Displaced Persons in Europe, 1946-1951*, in *The Cambridge Survey of World Migration.*, Cohen R., (ed.), Cambridge University Press, Cambridge.
- Khojjanian, Mazyar, 2016. "La Police des Étrangers face à l'immigration de travail dans la Belgique des Golden Sixties: gouvernementalité sécuritaire et gestion différentielle du séjour illégal (1962-1967)", *Cahiers Bruzellois – Brussels Cahiers 2016/1 (XLVIII)*, pp.223-325.
- Khosravi, Shahram, 2009. "Sweden: deportation and detention and deportation of asylum-seekers", *Race & Class*, vol. 50, no. 4, pp.38-56.
- Kirchhoff H., (2005), *En Menneske Uden Pas er Ikke Noget Menneske - Danmark I den internationale flygtningpolitik 1933-1939*, Syddansk Universitetsforlag, Odense.

- Kirchhoff, H. (2005). *Et menneske uden pas er ikke noget menneske. Danmark i den internationale flygtningepolitik 1933–1939*. Odense: Syddansk Universitetsforlag.
- Kjeldstadli, K. (2003). “Del III. 1901–1940” in Niemi, E., J. E. Myhre and K. Kjeldstadli (2003). *Norsk innvandringshistorie. Bind 2. I nasjonalstatens tid 1814–1940*. Oslo: Pax Forlag A/S.
- Kjeldstadli, K. (2013). “Norway, migration 19<sup>th</sup> century to present” in *The Encyclopedia of Global Human Migration*.
- Kjeldstadli K., (2003), *DEL III 1901–1940*, in ‘Norsk Innvandringshistorie Bind 2 I Nasjonalstatens tid 1814–1940’, pp. 317–478, eds., E. Neimi, J. E. Myhre & Kjeldstadli K., Pax Forlag A/S, Oslo.
- Kleiner-Liebau, D. (2009). *Migration and the Construction of National Identity in Spain*. Madrid: Iberiamericana
- Kleiner-Liebau, D., (2009). *Migration and the Construction of National Identity in Spain*. Madrid: Iberiamericana
- Koch, I. E. (2006). “Statsborgeret” in *Udlændingeret*. 3 ed. Copenhagen: Jurist- og Økonomforbundets Forlag.
- Komlosy, Andrea (2003). “Empowerment and Control. Conflicting Central and Regional Interests in Migration Within the Habsburg Monarchy” in Fahrmeir, Andreas, Olivier Faron and Patrick Weil (red.) (2003). *Migration control in the North Atlantic world: the evolution of state practices in Europe and the United States from the French Revolution to the inter-war period*. New York: Berghahn Books
- Kraler, A. (2011). Immigration and immigrant policy making in Austria. In G. Zincone, R. Penninx, & M. Borkert (Eds.), *The making of migration and integration policies in Europe: Processes, actors and contexts in past and present* (pp. 21–60). Amsterdam: IMISCOE Joint Studies.
- Kraler, A., (2004), *Immigrant and Immigration Policy Making - A Survey of the Literature - the Case of Austria*. Paper prepared for the IMISCOE C9 State of the Art Report in view of the First Annual Imiscoe Conference in Coimbra, Portugal, December 2004.
- Kraler, A., & Hollomey, C., (2010), ‘Austria: Irregular Migration – A Phenomenon in Transition’ *Irregular Migration in Europe: Myths and Realities* (ed.,) Triandafyllidou A., Routledge, Oxon.
- Kraler, Albert & Karin, Sohler, 2013. “Austria”, in (eds.) Triandafyllidou, Anna & Ruby Grapes (eds.) *European Immigration: A Sourcebook, European immigration: a sourcebook*, Farnham: Ashgate Publishing Limited, pp.19-31.
- Kraler, Albert, 2010. “Civic Stratification, Gender and Family Migration Policies in Europe”. Report International Centre for Migration Policy Development (ICMPD).
- Kraler, Albert, Hollomey, Christina, Hurich, Christoph, König, Alexandra & Gerhard Muzak, 2013. “Family Reunification: a barrier or facilitator of integration? Country Report Austria”. Available at: [https://web.archive.org/web/20220119125112/http://research.icmpd.org/fileadmin/Research-Website/Project\\_material/Family\\_Reunification\\_EIF/Austria1.pdf](https://web.archive.org/web/20220119125112/http://research.icmpd.org/fileadmin/Research-Website/Project_material/Family_Reunification_EIF/Austria1.pdf). Accessed: 2023-07-20.

- Kratzmann, K., (2016), *Resettlement and The Humanitarian Admission Programme In Austria*, International Organization for Migration, Country Office for Austria, Vienna.
- Kratzmann, Katerina, 2016. “Resettlement And the Humanitarian Admission Programme In Austria”. International Organization for Migration, Country Office for Austria, Vienna.
- Kratzmann, Katerina, Marik-Lebeck, Stephan, Petzl, Elisabeth & Mária Temesvári, 2011. *Temporary and circular migration in Austria*. National Contact Point Austria, European Migration Network. Vienna: IOM.
- Kreienbrink, A. “Country Profile No. 6, Spain”, *Focus Migration*. Available at: [http://focus-migration.hwwi.de/typo3\\_upload/groups/3/focus\\_Migration\\_Publikationen/Laenderprofile/C\\_P\\_06\\_Spain-08.pdf](http://focus-migration.hwwi.de/typo3_upload/groups/3/focus_Migration_Publikationen/Laenderprofile/C_P_06_Spain-08.pdf) [2016-02-09]
- Kussbach, Erik, 1994. “The 1991 Austrian Asylum Act”, *International Journal of Refugee Law*, vol. 6, no. 2, pp. 227–243.
- Kvist, Jon, 2016. “Recent Danish migration and integration policies”. European Social Policy Network Flash Report 2016/14.
- Lajos A., (2013)., *From Contract to Political Refugees*, in ‘Reaching a State of Hope’, ed., Byström M. & Frhonert P., pp. 175-189. Nordic Academic Press, Lund.
- Larsen, Niels Henrik, 2017. “Betingelser for indrejse I Danmark og visumregler” in Dilou, Jacobsen Bjørn, Larsen, Niels Henrik, Lassen, Nina Marie, Lindholm, Jesper & Jens Vedsted-Hansen (eds.) *Udlændingeret: indrejse, visum, asyl, familiesammenføring*. København: Jurist- og Økonomforbundet, pp.39-102.
- Larsen, Niels Henrik, 2017. “Betingelser for indrejse I Danmark og visumregler” in Dilou, Jacobsen Bjørn, Larsen, Niels Henrik, Lassen, Nina Marie, Lindholm, Jesper & Jens Vedsted-Hansen (eds.) *Udlændingeret: indrejse, visum, asyl, familiesammenføring*. København: Jurist- og Økonomforbundet, p.39-102.
- Larsen, U. M. (1979). *En kvantitativ undersøgelse af udvandringen fra Danmark til USA 1870–1913*. Odense: Skrifter fra historisk institut, Odense Universitet, nr. 26.
- Lassen, N. (2006). “Flygtningekonventionen og udlændingelovens flygtningebegreber” in *Udlændingeret*. 3 ed. Copenhagen: Jurist- og Økonomforbundets Forlag.
- Lens A., (2014), *(Un)desired immigration? Family reunification in Belgium until 1980*, in ‘Contemporaine-Belgisch Tijdschrift Voor Nieuwste Geschiedenis’, 44(2-3), pp. 293 – 296.
- Levine, P. A., (1996). *From Indifference to Activism. Swedish Diplomacy and the Holocaust, 1938–1944*. Uppsala: Studia Historica Upsaliensia.
- Lewin, R. (1997). “Balises pour l’avant 1974” in Coenen, M. T. and R. Lewin (Ed.) (1997). *La Belgique et ses immigrants*. Bruxelles: Politique et Histoire, De Boeck Université.
- Leyes fundamentales del reino, (1975), Published by DONCEL, Madrid.
- Liebig, Thomas, 2007. “The Labour Market Integration of Immigrants in Denmark”. OECD Social, Employment, and Migration Working Papers no. 50.
- Liénard-Ligny, M. (2001). “Nationality Law in Belgium and Luxembourg” in Hansen, R. and P. Weil *Towards a European Nationality*. New York: Palgrave.

Lindberg H., (1973), *Svensk Flyktingpolitik Under Internationellt Tryck 1936-1941*, Allmänna förlaget, Stockholm.

Lloyd, M. (2003). *The Passport. The History of Man's Most Travelled Document*. Gloucestershire: Sutton Publishing Limited.

Lokrantz Bernitz H., (2009), *EUDO Citizenship Observatory. Country report: Sweden*, European University Institute, Florence.

Long & Olsen, 2008. "Evaluation of the Norwegian program for the resettlement of UN refugees (2008)". Commissioned by UDI. Available at: [https://www.udi.no/globalassets/global/forskning-fou\\_i/beskyttelse/evaluation-of-the-norwegian-program-for-resettlement-of-un-refugees.pdf](https://www.udi.no/globalassets/global/forskning-fou_i/beskyttelse/evaluation-of-the-norwegian-program-for-resettlement-of-un-refugees.pdf). Accessed: 2019-06-16.

Losman, B. (2005). *Förvaltningshistorik*. Riksarkivet: <https://web.archive.org/web/20170724084816/http://xml.ra.se/Forvaltningshistorik/Index.htm> Accessed: 2023-07-20.

Lov 15. Mai 2008 nr. 35 om utlendingers adgang til riket og deres opphold her (utlendingsloven).

Lov nr 403 2005 = Lov om ændring af udlændingeloven, LOV nr 403 af 01/06/2005, 2005. "Lov om ændring af udlændingeloven (Ændret udvælgelse af og styrket integrationsindsats over for kvoteflygtninge)". Available at: <https://www.retsinformation.dk/eli/ft/201512L00087>. Accessed: 2023-07-20.

Lov nr. 169 1953. "Danmarks Riges Grundlov (Grundloven)". Available at: <https://www.retsinformation.dk/Forms/R0710.aspx?id=45902>. Accessed: 2019-04-10.

Lövgren, A-B. (2000). "Rätten att färdas fritt" in L. M. Andersson (red.). *Rätten*. Lund: Nordic Academic Press.

Loyal S., and Quilley S., (2018), *State Power and Asylum Seekers in Ireland - An Historically Grounded Examination of Contemporary Trends*, Palgrave Macmillan, Houndmills Basingstoke.

Lukits, Rainer, 2016. "Family Reunification of third-country nationals in Austria". Available at: [https://ec.europa.eu/home-affairs/sites/homeaffairs/files/01\\_austria\\_family\\_reunification\\_final\\_en.pdf](https://ec.europa.eu/home-affairs/sites/homeaffairs/files/01_austria_family_reunification_final_en.pdf). Accessed: 2019-05-02. Accessed: 2019-05-17.

Lundh, C. and R. Ohlsson (1999). *Från arbetskraftsimport till flyktinginvandring*. Andra upplagan. Kristianstad: SNS - Studieförbundet Näringsliv och Samhälle.

Lundh, Christer & Rolf Ohlsson, 1994. *Från arbetskraftsimport till flyktinginvandring*. Stockholm: SNS förlag.

Mahroum, Sami, 2001. "Europe and the Immigration of Highly Skilled Labour", *International Migration*, vol. 39, no.5, pp.27-43.

Marín et al, (2015), *EUDO Citizenship Observatory Country Report on Citizenship Law: Spain*, European University Institute, Florence.

- Marín, R. R. (2006). "Spain" in Bauböck, R., E. Ersbøll, K. Groenendijk and H. Waldrauch (2006). *Acquisition and Loss of Nationality Policies and Trends in 15 European States. Volume 2: Country Analyses*. Amsterdam: Amsterdam University Press.
- Martens, A. (1977). *Les immigrés. Flux et reflux d'une main-d'œuvre d'appoint. La politique belge de l'immigration de 1945 à 1970*. Leuven: Leuven University Press.
- Martiniello M., and Rea A., (2003) "Belgium's Immigration Policy Brings Renewal and Challenges", *Migration Information Source Country Profiles*. Washington, DC: Migration Policy Institute. [Accessed 2018-04-03]
- Martiniello M., and Rea A., *Une brève histoire de l'immigration en Belgique*, Fédération Wallonie Bruxelles, Brussels.
- Martiniello Marco, & Andrea Rea, 2003. "Belgium's Immigration Policy Brings Renewal and Challenges", *Migration Information Source Country Profiles*. Washington, DC: Migration Policy Institute. [Electronic]. Available at: <https://www.migrationpolicy.org/article/belgiums-immigration-policy-brings-renewal-and-challenges>. Accessed: 2019-03-15.
- Martiniello, M. and A. Rea (1997). "Construction européenne et politique d'immigration" in Coenen, M. T. and R. Lewin (Ed.) (1997). *La Belgique et ses immigrés*. Bruxelles: Politique et Histoire, De Boeck Université.
- Martiniello, Marco, 2003. "Belgium's Immigration Policy", *The International Migration Review*, vol.37 no.1, pp.225-232.
- Mayer, Stefanie, 2011. "Rotation, Integration and Social Exclusion, Discourse and Change in/of Migration Policies in Austria" in Roth, Klaus & Robert Hayden (eds.) *Migration in, from, and to Southeastern Europe. Part 1, Historical and cultural aspects. Etnologica Baltanica*, vol. 13. Berlin: Lit, pp.129-146.
- Mendelsohn O., (1969), *Jødens Historie i Norge gjennom 300 år Bind 1: 1660-1940*, Universitetsforlaget, Oslo.
- Merckx F., and Fekete L., (1991), *Belgium: the racist cocktail*, in 'Race & Class' 32(3), po. 67-79.
- Merckx Freddy & Liz Fekete, 1991. "Belgium: the racist cocktail", *Race & Class*, vol.32, no.3, pp. 67-79.
- Merhaut, Nina & Verena Stern, 2018. "Asylum policies and protests in Austria" in Rosenberger, Sieglinde, Stern, Verena & Nina Merhaut (eds.) *Protest Movements in Asylum and Deportation*, Cham: Springer International Publishing, pp.29-47.
- Midtbøen, Arnfinn H., Birkvad, Simon Roland, Erdal & Marta Bivand, 2018. "Citizenship in the Nordic Countries: Past, Present, Future". Copenhagen: Nordisk Ministerråd.
- Mielcke Hansen, Sara, 2016. "Udlændingelove 1983-2002". [Electronic]. Available at: [danmarkshistorien.dk](http://danmarkshistorien.dk). Accessed: 2019-04-12.
- Midtbøen, Arnfinn, 2019. "No longer the 'last man standing': Norway decides to allow dual citizenship", News article, 2019-01-09. [Electronic]. Available at: <http://globalcit.eu/no-longer-the-last-man-standing-norway-decides-to-allow-dual-citizenship/>. Accessed: 2019-05-26.



Migration Policy Institute. (2003). *Austria: A Country of Immigration?* Available at: <https://www.migrationpolicy.org/article/austria-country-immigration>. Accessed: 2023-07-20.

Migrationsverket b, 2019. "Historik", [Electronic]. Available at: <https://www.migrationsverket.se/Om-Migrationsverket/Migration-till-Sverige/Historik.html>. Accessed: 2019-05-22.

Migrationsverket, 2017. "Vad innebär svenskt medborgarskap?", [Electronic]. Available at: <https://www.migrationsverket.se/Privatpersoner/Bli-svensk-medborgare/Vad-innebar-svenskt-medborgarskap.html>. Accessed: 2019-05-27.

Migrationsverket, 2018. "Sweden's Resettlement Programme – 2018", [Electronic]. Available at: <https://web.archive.org/web/20181105201051/https://www.migrationsverket.se/download/18.1ef19f6e163f45d340a1fb0/1535440168410/SwedenResettlementProgramme2018.pdf>. Accessed: 2023-07-20.

Migrationsverket, 2019. "Sveriges flyktingkvot 2019", [Electronic]. Available at: <https://www.migrationsverket.se/download/18.4cb46070161462db1132033/1557926648591/Sveriges%20flyktingkvot%202019.pdf>. Accessed: 2019-05-27.

Minderhoud, Paul & Bjarney Fridriksdottir, 2013. "Report on Posts in the Public Sector Reserved for Nationals Developments in the 27 Member States in 2009-2012", Network on Free Movement of Workers.

Ministry of Foreign Affairs, Denmark. "Danish Military Services for Foreign Nationals". [Electronic]. Available at: <https://usa.um.dk/en/denmark-in-us/defense-and-security/danish-military-service-for-foreign-nationals>. Accessed: 2023-07-20.

Ministry of Justice, 2018. "Sweden's Migration and Asylum Policy", [Electronic]. Available at: <https://reliefweb.int/report/sweden/swedens-migration-and-asylum-policy-february-2018>. Accessed: 2023-07-20.

Ministry of Social Affairs and Health, (2018), *History - From Grand Duchy to welfare state*, [https://stm.fi/en/ministry/history], [Accessed 2018-07-17].

Ministry of the Interior, (1997), *Behärskad invandring och effektiv integration – Betänkande av kommissionen för invandrar och flyktingpolitik*, kommittébetänkande 1997:5, Inrikesministeriet, Helsinki.

Ministry of the Interior, (2004), Aliens Act (301/2004, amendments up to 1152/2010 included), Ministry of the Interior, Finland.

MIPEX 2015a= Migrant Integration Policy Index, 2015. "Austria. Key Findings Access to Nationality". [Electronic] Available at: <http://www.mipex.eu/austria#/tab-access-to-nationality>. Accessed: 2019-05-02

MIPEX 2015b= Migrant Integration Policy Index, 2015. "Austria. Key Findings Family Reunion". [Electronic] Available at: <http://www.mipex.eu/austria#/tab-family-reunion>. Accessed: 2019-05-02.

- MIPEX 2015c= Migrant Integration Policy Index, 2015. “Norway. Key Findings Labour Market Mobility”. [Electronic], Available at: <http://www.mipex.eu/norway#/tab-labour-market-mobility>. Accessed: 2019-05-28.
- Moreno F., (2004), *The Evolution of Immigration Policies In Spain. Between External Constraints and Domestic Demand for Unskilled Labour*, Estudio/Working Paper 2004/211.
- Mörkenstam, U. (2006). “‘Önskvärda och icke önskvärda folkelement’. Den normativa argumentationen i svensk invandringspolitik 1900–1950.” *Historisk tidskrift för Finland*, Vol. 91, nr 3, 285–319.
- Mourão Permoser, Julia & Sieglinde Rosenberger, “Integration Policy in Austria” in Biles, Johan & James Frideres (eds.) *International Perspectives: Integration and Inclusion*, Kinston, Ont: Queen’s Policy Studies, pp.39-58.
- Mouritsen, Per & Tore Vincents Olsen, 2013. “Denmark between liberalism and nationalism”, *Ethnic and Racial Studies*, Vol. 36, No. 4, pp.691-710.
- Myhre, E. J. (2003). “Del II. 1860-1901” in Niemi, E., J. E. Myhre and K. Kjeldstadli (2003). *Norsk innvandringshistorie. Bind 2. I nasjonalstatens tid 1814-1940*. Oslo: Pax Forlag A/S.
- Myong, Lene & Mons Bissenbakker, 2016. “Love without Borders”, *Cultural Studies*, vol. 30 no.1, pp.129-146.
- Nannestad P., (2004), *Immigration as a challenge to the Danish welfare state?* In ‘European Journal of Political Economy’, vol 20, pp. 755-767.
- Nethery A., and Silverman S., (2015), *Immigration detention: the migration of a policy and its human impact*, Routledge, Oxon.
- Nielsen, Amanda, 2016. *Challenging Rightlessness. On Irregular Migrants and the Contestation of Welfare State Demarcation in Sweden*, Doctoral Dissertation. Växjö: Linneus University Press.
- Niemi, E. (2003). “Del I. 1814–1860” in Niemi, E., J. E. Myhre and K. Kjeldstadli (2003). *Norsk innvandringshistorie. Bind 2. I nasjonalstatens tid 1814–1940*. Oslo: Pax Forlag A/S.
- Niemi, E. (2003). “Regimskifte, innvandrere og fremmede” in Niemi, E., J. E. Myhre and K. Kjeldstadli (2003). *Norsk innvandringshistorie. Bind 2. I nasjonalstatens tid 1814–1940*. Oslo: Pax Forlag A/S.
- Nordisk Utredningsserie, (1970), *Utlåningspolitikk og Utlåningslagstiftning i Norden*, Nordiska Rådet, Stockholm.’
- Nordisk Utredningsserie, 1970. *Utlåningspolitikk og Utlåningslagstiftning i Norden*, Stockholm: Nordiska Rådet.
- Norges Lov 1682-1932, (1932), *1927 Års Lov om utledningers adgang til riket*, Oslo.
- Norman, H. & Runblom, H. (1988). *Transatlantic connections: Nordic migration to the New World after 1800*. Oslo: Norwegian University Press
- NOU - Norges Offentlige Utredninger, (1973:17), *Innvandringspolitikk*, Universitetsforlaget, Oslo.

- NOU - Norges Offentlige Utredninger, (1983:47), *Ny Fremmedlov*, Universitetsforlaget, Oslo.
- NOU - Norges Offentlige Utredninger, (2000:32), *Lov om erverv og tap av norsk statsborgerskap*, Statens forvaltningstjeneste Informasjonsforvaltning, Oslo.
- NOU - Norges offentlige utredninger, (2015:2). *Tap av norsk statsborgerskap*, Statens forvaltningstjeneste Informasjonsforvaltning, Oslo.
- NOU - Norges offentlige utredninger, (2015:7), *Assimilering og motstand - Norsk politikk overfor taterne/romanifolket fra 1850 til i dag*, Statens forvaltningstjeneste Informasjonsforvaltning, Oslo.
- NOU – Norges Offentlige Utredninger (2011:7). *Velferd og migrasjon. Den norske modellens framtid*. Statens forvaltningstjeneste Informasjonsforvaltning, Oslo.
- NOU- Norges Offentlige Utredninger (2004:20), *Ny utlendingslov*, Statens forvaltningstjeneste Informasjonsforvaltning, Oslo.
- NOU- Norges Offentlige Utredninger (2004:20), *Ny utlendingslov*, Statens forvaltningstjeneste Informasjonsforvaltning, Oslo.
- Nye tider. Nye krav, 2010. “Nye tider, Nye krav. Aftale mellem regeringen og Dansk Folkeparti, 7 november 2010.” Available at: [https://web.archive.org/web/20140723083810/https://danskfolkeparti.dk/pictures\\_org/nye\\_tid\\_er\\_nye\\_krav.pdf](https://web.archive.org/web/20140723083810/https://danskfolkeparti.dk/pictures_org/nye_tid_er_nye_krav.pdf). Accessed: 2023-07-20.
- Nykänen E., (2012), *Migration Law in Finland*, 2nd edition, Kluwer Law International,
- Nykänen E., E., Pirjatanniemi E., Sorainen O., Staffans I., *Migration Law in Finland*, 2nd ed. Edition, Kluwer Law International, Alphen aan den Rijn. ”
- O’Connor S., (2008), “Alien family’: The impact of the Aliens Act 1935 and subsequent Orders on the family in Ireland, 1933–1945’ in *The History of the Family*, 13(4), pp. 384-394.
- Oddleif L. (1996). "Prestearkivenes kilder om flyttinger" in *Heimen* nr 33, side 47-52. Available at: <https://web.archive.org/web/20190216203813/http://digitalarkivet.uib.no/sab/flytting.htm> Accessed: 2023-07-20.
- OECD 1997, 1998, 1999, 2000, 2003. “Trends in International Migration 199X”, [Electronic]. Available at: [https://www.oecd-ilibrary.org/social-issues-migration-health/trends-in-international-migration\\_20746873](https://www.oecd-ilibrary.org/social-issues-migration-health/trends-in-international-migration_20746873). Accessed: 2019-05-17.
- OECD 2005, 2006, 2007, 2008, 2011, 2012, 2015, 2016, 2018. “International Migration Outlook 20XX”, [Electronic]. Available at: [https://www.oecd-ilibrary.org/social-issues-migration-health/international-migration-outlook\\_1999124x](https://www.oecd-ilibrary.org/social-issues-migration-health/international-migration-outlook_1999124x). Accessed: 2023-07-20.
- OECD, (1997), *SOPEMI Trends in International Migration - Continuous Reporting System On Migration. Annual Report 1996*, Organisation for Economic Co-Operation And Development.
- OECD, (2008), *International Migration Outlook: Sopemi 2007 Edition*,

- OECD, 1997. “Trends in International Migration 1997”. [Electronic]. [Available at https://www.oecd-ilibrary.org/social-issues-migration-health/trends-in-international-migration-1997\\_migr\\_outlook-1997-en](https://www.oecd-ilibrary.org/social-issues-migration-health/trends-in-international-migration-1997_migr_outlook-1997-en). Accessed: 2023-07-20.
- OECD, 1999. “Trends in International Migration 1999”. [Electronic]. [Available at https://www.oecd-ilibrary.org/social-issues-migration-health/trends-in-international-migration-1999\\_migr\\_outlook-1999-en](https://www.oecd-ilibrary.org/social-issues-migration-health/trends-in-international-migration-1999_migr_outlook-1999-en). Accessed: 2023-07-20.
- OECD, 2001. “Trends in International Migration 2001”. [Electronic]. [Available at https://www.oecd-ilibrary.org/social-issues-migration-health/trends-in-international-migration-2001\\_migr\\_outlook-2001-en](https://www.oecd-ilibrary.org/social-issues-migration-health/trends-in-international-migration-2001_migr_outlook-2001-en). Accessed: 2023-07-20.
- OECD, 2003. “Trends in International Migration 2003”. [Electronic]. [Available at https://www.oecd-ilibrary.org/social-issues-migration-health/trends-in-international-migration-2003\\_migr\\_outlook-2003-en](https://www.oecd-ilibrary.org/social-issues-migration-health/trends-in-international-migration-2003_migr_outlook-2003-en). Accessed: 2023-07-20.
- OECD, 2005. “Trends in International Migration 2004”, [Electronic]. [Available at https://www.oecd-ilibrary.org/social-issues-migration-health/trends-in-international-migration-2004\\_migr\\_outlook-2004-en](https://www.oecd-ilibrary.org/social-issues-migration-health/trends-in-international-migration-2004_migr_outlook-2004-en). Accessed: 2023-07-20.
- OECD, 2008. “International Migration Outlook 2008”, [Electronic]. [Available at https://www.oecd-ilibrary.org/social-issues-migration-health/international-migration-outlook-2008\\_migr\\_outlook-2008-en](https://www.oecd-ilibrary.org/social-issues-migration-health/international-migration-outlook-2008_migr_outlook-2008-en). Accessed: 2023-07-20.
- OECD, 2010. “International Migration Outlook 2010”, [Electronic]. [Available at https://www.oecd-ilibrary.org/social-issues-migration-health/international-migration-outlook-2010\\_migr\\_outlook-2010-en](https://www.oecd-ilibrary.org/social-issues-migration-health/international-migration-outlook-2010_migr_outlook-2010-en). Accessed: 2023-07-20.
- OECD, 2011. “La naturalisation: un passeport pour une meilleure intégration des immigrés?, Éditions OCDE.” [Electronic]. [Available at https://www.oecd-ilibrary.org/social-issues-migration-health/la-naturalisation-un-passeport-pour-une-meilleure-integration-des-immigres\\_9789264099623-fr](https://www.oecd-ilibrary.org/social-issues-migration-health/la-naturalisation-un-passeport-pour-une-meilleure-integration-des-immigres_9789264099623-fr). Accessed: 2023-07-20.
- OECD, 2011. “Recruiting Immigrant Workers: Sweden 2011”. Paris, France: OECD Publishing.
- OECD, 2014. “Recruiting Immigrant Workers: Austria 2014”, [Electronic]. [Available at https://www.oecd-ilibrary.org/social-issues-migration-health/recruiting-immigrant-workers-austria-2014\\_9789264226050-en](https://www.oecd-ilibrary.org/social-issues-migration-health/recruiting-immigrant-workers-austria-2014_9789264226050-en). Accessed: 2023-07-20.
- OECD, 2014. “Recruiting Immigrant Workers: Norway 2014”, [Electronic]. [Available at https://www.oecd-ilibrary.org/social-issues-migration-health/recruiting-immigrant-workers-norway-2014\\_9789264226135-en](https://www.oecd-ilibrary.org/social-issues-migration-health/recruiting-immigrant-workers-norway-2014_9789264226135-en). Accessed: 2023-07-20.
- OECD, 2017. “International Migration Outlook 2017”, [Electronic]. [Available at https://www.oecd-ilibrary.org/social-issues-migration-health/international-migration-outlook-2017\\_migr\\_outlook-2017-en](https://www.oecd-ilibrary.org/social-issues-migration-health/international-migration-outlook-2017_migr_outlook-2017-en). Accessed: 2023-07-20.
- OECD, 2018. “International Migration Outlook 2018”. [Electronic]. [Available at https://www.oecd-ilibrary.org/social-issues-migration-health/international-migration-outlook-2018\\_migr\\_outlook-2018-en](https://www.oecd-ilibrary.org/social-issues-migration-health/international-migration-outlook-2018_migr_outlook-2018-en). Accessed: 2023-07-20.

Olivero I., (2017), 'Exile and Migration (Spain) 1914-1918', *International Encyclopaedia of the First World War*.

Opsal, E. and S. Sogner (2003). *Norsk innvandringshistorie. Bind. I. I Kongens tid 900-1814*. Oslo: Pax Forlag A/S.

Orchard, Phil, 2019. "The historical development of refugee protection in Europe" in Weinar, Agnieszka, Bonjour, Saskia, & Lyubov Zhyznomiska (eds.) *The Routledge Handbook of the Politics of Migration in Europe*. Routledge: Abindon, pp.283-292.

Ort́ega Perez, N. "Spain Forging an Immigration Policy." *The Online Journal of the Migration Policy Institute*. Available at: <http://www.migrationpolicy.org/article/spain-forging-immigration-policy> [2016-02-09]

Østergaard B., (2007), *Invandrerne i Danmarks Historie – Kultur- og religionsmøder*, Syddansk Universitetsforlag, Odense.

Østergaard, B. (1983). *Invandrerne i Danmarkshistorie*. Copenhagen: G.E.C Gads Forlag 1983.

Østergaard, Bent, 2007. *Indvandrerne i Danmarks Historie. Kultur- og religionsmøder*. Odense: University Press of Southern Denmark.

Paasivirta E., (1984), 'Reformforslag till Behandling Av Flyktingarenden' in *Nordic Journal of International law*, 53(71), pp 70–73.

Papadopoulou A., Treviranus B., Moritz T. and Fandrich C., (2013), *Comparative study on the best practices for the integration of resettled refugees in the EU Member States*, Directorate General for Internal Policies Policy Department C: Citizens' Rights And Constitutional Affairs, Brussels.

Pastore S., (2010), *A community out of balance: nationality law and migration politics in the history of post-unification Italy*, *Journal of Modern Italian Studies*, 9(1), pp. 27-48.

Pastore, F. (2001). "Nationality Law and International Migration: The Italian Case" in Hansen, R. and P. Weil (2001). *Towards a European Nationality. Citizenship, Immigration and Nationality Law in the EU*. New York: Palgrave.

Pastore, F. (2010). "Immigration in Italy today. A community out of balance: nationality law and migration politics in the history of post-unification Italy". *Journal of Modern Italian Studies*, 9:1, pp. 27-48.

Pedersen, E. H. (1987). "Polakloven. Lovgivning omkring polske landarbejdere" in Blüdnikov, B. (Ed.) (1987). *Fremmede i Danmark. 400 års dremmedpolitik*. Odense: Odense Universitetsforlag.

Pedersen, S. (1999). « Migration to and from Denmark during the period 1960-97 » in Coleman, D. et al. *Immigration to Denmark. International and national perspectives*. Aarhus: Aarhus University Press.

Perrin, Delphine & Frank McNamara, 2013. "Refugee Resettlement in the EU: Between Shared Standards and Diversity in Legal and Policy Frames" Research paper. Available at: <http://www.migrationpolicycentre.eu/docs/Know-Reset-RR-2013-03.pdf>. Accessed at: 2019-03-05.

Petersen H., (1989), *De nordiska lande og Hitler-flyktingene*, in Nordisk Flyktningspolitik i världskrigens epok, eds., Johansson R. & H. Å. Persson, Lund Univeristy Press, Lund.

Plender, R. (1988). *International Migration Law*. Revised Secind Edition. Dordrecht: Martinus Nijhoff Publishers.

Politiet (2015). *Politihistorie*. Available at: [https://web.archive.org/web/20111026071834/https://www.politi.no/om\\_politiet/politihistorie/](https://web.archive.org/web/20111026071834/https://www.politi.no/om_politiet/politihistorie/) Accessed: 2023-07-20.

Prop 1968:142. 'Angående riktlinjer för utlännings politiken m. m.'

Prop. 2007/08:147. Nya regler för arbetskraftsinvandring.

Prot.1997/98: 91. Riksdagens protokoll 16 april 1998.

Ramos, F. P. (2004). *Media and Migrants. A Critical Analysis of Spanish and Irish Discourses on Immigration*. Bern: Peter Lang.

Rea, A. (1997). « Mouvements sociaux, partis et intégration » in Coenen, M. T. and R. Lewin (Ed.) (1997). *La Belgique et ses immigrants*. Bruxelles: Politique et Histoire, De Boeck Université.

Rea, A. (2006). « Les politiques d'immigration » in in Khader, B., M. Martiniello, A. Rea, C. Timmerman (2006). *Penser l'immigration et l'intégration autrement. Une initiative belge inter-universitaire*. Bruylant: Bruxelles.

Regeringen.se, 2014. "Ändringar i medborgarskapslagen 2015". [Electronic]. Available at: <https://web.archive.org/web/20220709225227/http://www.regeringen.se/artiklar/2014/10/andringar-i-medborgarskapslagen-2015>. Accessed: 2023-07-20.

Reuters, 2017. "Austria says wants exemption from EU migrant relocation system". News article. 2017-03-28. [Electronic]. Available at: <https://www.reuters.com/article/us-europe-migrants-austria/austria-says-wants-exemption-from-eu-migrant-relocation-system-idUSKBN16Z166>. Accessed: 2019-05-10.

Reuters, 2018. "From phones to hospitals, Austria plans to clamp down on refugees" News article. 2018-04-18. [Electronic]. Available at: <https://www.reuters.com/article/us-austria-politics-refugees/from-phones-to-hospitals-austria-plans-to-clamp-down-on-refugees-idUSKBN1HP24O>. Accessed: 2019-05-10.

Reuterswärd, E. (1995). *Att söka sina utländska rötter: en vägledning till källor om invandring i svenska statliga myndigheters arkiv under 1900-talet*. Lund: Landsarkivet

Rhus M. and Quinn E., (2009), *Ireland: From Rapid Immigration to Recession*, Migration Policy Institute, [<https://www.migrationpolicy.org/article/ireland-rapid-immigration-recession>], Accessed 2018-07-26.

Rhus M., (2005), *Migration and Employment of non-EU nationals in Ireland*, The Policy Institute Trinity College, Dublin.

- Riiskjaer, Maria Helene Bak & Tilde Nielsson, 2008. "Research paper no. 165: Circular repatriation: the unsuccessful return and reintegration of Iraqis with refugee status in Denmark". UNHCR: Geneva. Available at: <https://www.unhcr.org/48eb34c72.pdf>.
- Rødsten S., (1994), "Utviklingen av politiets fremmedkontroll 1901 – 1956" in *Jubileumsskrift for Statsarkivet i Oslo*. Oslo: Statsarkivet, 1994.
- Rönnqvist, Sofia, 2009. "Strategies from below: vietnamese refugees, education, secondary moves and ethnic networks" in Pieter, Bevelander, Hagström, Mirjam, & Sofia Rönnqvist (eds.) *Resettled and included? the employment integration of resettled refugees in Sweden*. Malmö Institute for Studies of Migration, Diversity and Welfare (MIM). Malmö: Holmbergs. Pp.129-158. Available at: Available at: <https://mau.diva-portal.org/smash/get/diva2:1405336/FULLTEXT01.pdf>. Accessed: 2023-07-20.
- Rosoli, G. (1993). "Italy: Emergent Immigration Policy" in Kubat, D. (1993). *The Politics of Migration Policies*. New York: Center for Migration Studies.
- Rosvoll M. and Bielenberg N., 2012, 'Antisiganisme, stereotypier og diskriminering av rom', *HL-senterets temahefte nr.14*, Senter for studier av Holocaust og livssynsminoriteter, Oslo.
- Rüniz L., (2005), *Af Hensyn til Konsekvenserne – Danmark og flygtningespørgsmålet 1933-1940*, Syddansk Universitetsforlag, Odense.
- Rupnow, D., (2017), 'The History and Memory of Migration in Post-War Austria' in *Migration in Austria*, Contemporary Austrian Studies Vol 26., Innsbruck University Press, Innsbruck.
- Rupnow, Dirk, 2017. "The History and Memory of Migration in Post-War Austria" in Bischof, Günter & Rupnow, Kirk (eds.) *Migration in Austria*, Contemporary Austrian Studies Vol 26., Innsbruck University Press: Innsbruck, pp.37-68.
- SCB =Statistiska Centralbyrån, 2004. "Efterkrigstidens invandring och utvandring", [Electronic]. Available at: [https://web.archive.org/web/20070120123123/https://www.scb.se/statistik/\\_publikationer/BE0701\\_1950I02\\_BR\\_BE51ST0405.pdf](https://web.archive.org/web/20070120123123/https://www.scb.se/statistik/_publikationer/BE0701_1950I02_BR_BE51ST0405.pdf). Accessed: 2023-07-20.
- SFS 2005:716. Utlänningslag.
- Scharf, Michaela, 2013. "Know Reset- Country Profile Austria", [Electronic]. Available at: [http://www.know-reset.eu/files/texts/00144\\_20130902161914\\_knowresetcountryprofileaustria.pdf](http://www.know-reset.eu/files/texts/00144_20130902161914_knowresetcountryprofileaustria.pdf). Accessed: 2019-05-14.
- Scharling, Will, 1883. "Ind- og Udvandring til og fra Danmark 1820—82" (*Nationaløkonomisk Tidsskrift*, Ny rk. 1) [http://img.kb.dk/tidsskriftdk/pdf/nto/nto\\_nrk\\_0001-PDF/nto\\_nrk\\_0001\\_96927.pdf](http://img.kb.dk/tidsskriftdk/pdf/nto/nto_nrk_0001-PDF/nto_nrk_0001_96927.pdf). Accessed: 2023-07-20.
- Schober, M. C. (1996). "Austrian Immigration to Canada in the Imperial Period" in Szabo, F. A. J. (red.) (1996). *A history of the Austrian Migration to Canada. Selected Essays* (pp. 45–58). McGill-Queen's University Press.
- Sciortino G., (2009), *Fortunes and miseries of Italian labour migration policy*, Compagnia di San Paulo, Rome.

Semmingsen, I. (1941). *Veien mot Vest. Utvandringen fra Norge til Amerika 1825-1865*. Oslo: H. Aschehoug & CO. (W. Nygaard).

Senato della Repubblica, (2012), *Costituzione della Repubblica Italiana*, la Libreria del Senato, Rome

SFS 1809. Regeringsformen.

SFS 1974:152. Regeringsformen

Shalter, M. B. (2003). *Rights of Passage. The Passport in International Relations*. Colorado: Lynne Rienner Publishers.

Silvennoinen O, (2013), 'Helsinki: On the Brink – Finland and the Holocaust Era' in *Civil Society and the Holocaust: International Perspectives on Resistance and Rescue*, edited by Cecilia Felicia Stokholm Banke & Anders Jerichow, Humanity in Action Press, Copenhagen.

Skodo, Admir, 2018. "Sweden: By turns welcoming and restrictive in its immigration policy", 2018-12-06. [Electronic]. Available at: <https://www.migrationpolicy.org/article/sweden-turns-welcoming-and-restrictive-its-immigration-policy>. Accessed: 2019-05-27.

Spång, Mikael, 2015. "Svenskt medborgarskap. Reglering och förändring i ett skandinaviskt perspektiv". Delmi Rapport 2015:15.

SOPEMI 2003. "SOPEMI Norway 2003. Trends of migration to and from Norway and the situation of immigrants in Norway". [Electronic]. Available at: <https://www.regjeringen.no/globalassets/upload/kilde/krd/rap/2003/0002/ddd/pdfv/194006-sopemi-rapport2003.pdf>. Accessed: 2019-05-27.

SOPEMI 2008. "SOPEMI report for Norway. International Migration 2007-2008". [Electronic]. Available at: [https://www.regjeringen.no/globalassets/upload/aid/publikasjoner/rapporter\\_og\\_planer/2008/r2008\\_migration\\_sopemi.pdf](https://www.regjeringen.no/globalassets/upload/aid/publikasjoner/rapporter_og_planer/2008/r2008_migration_sopemi.pdf). Accessed: 2019-05-27.

SOU 1967:18. Inrikesdepartementet (1967). *Invandringen: problematik och handläggning. Utlänningsutredningens betänkande, 2*. Stockholm: Esselte AB

SOU 1972:84. Inrikesdepartementet (1972). *Flyktingskap. Utlänningsutredningens betänkande V*. Stockholm: Beckmans tryckerier AB.

SOU 1993: 113. "Invandring och Asyl I teori och praktik. En jämförelse mellan tolv länders politik". Available at: <https://lagen.nu/sou/1993:113?attachment=index.pdf&repo=soukb&dir=downloaded>. Accessed: 2023-07-20.

SOU 2005:50. Kommittén för arbetskraftsinvandring (2005). *Arbetskraftsinvandring till Sverige: befolkningsutveckling, arbetsmarknad i förändring, internationell utblick: delbetänkande*. Stockholm: Fritzes offentliga publikationer.

Spanish Civil Code of 1889 (approved by Royal Decree of July 24, 1889) – English translation available at [[http://www.wipo.int/wipolex/en/text.jsp?file\\_id=221319](http://www.wipo.int/wipolex/en/text.jsp?file_id=221319)] [Accessed 2018-06-13].



- Speer, Benedikt, 2018. "External and internal effects on how Austria has handled the refugee crisis", *Croatian and Comparative Public Administration*, vol.18, no 2, pp.247-268.
- SSB = Statistisk sentralbyrå 2017. "UDI and the immigration administration", [Electronic], Available at: <https://www.ssb.no/en/befolkning/artikler-og-publikasjoner/udi-and-the-immigration-administration>. Accessed: 2019-05-27.
- Staats- Und Verwaltungsrecht, (1938), *Deutsches Reich Ausländerpolizeiverordnung, VOM 22. August*, available at: [http://www.zaoerv.de/08\\_1938/8\\_1938\\_1\\_b\\_793\\_799\\_1.pdf](http://www.zaoerv.de/08_1938/8_1938_1_b_793_799_1.pdf) [accessed 2018-05-30].
- Stadlmair, Jeremiah, 2018. "Earning citizenship. Economic criteria for naturalisation in nine EU countries", *Journal of Contemporary European Studies*, vol.26, no. 1, pp.42-63.
- Statens Offentliga Utredningar (SOU) 1972:84, 1972. *Utlänningsutredningens betänkande V*. Inrikesdepartementet. Stockholm.
- Statens Offentliga Utredningar (SOU) 2002:13, 2002. *Vår anhöriginvandring Delbetänkande av Anhörigkommittén*, Inrikesdepartementet. Stockholm.
- Statens Offentliga Utredningar (SOU) 2006:87, 2006. *Arbetskraftsinvandring till Sverige - förslag och konsekvenser*. Inrikesdepartementet. Stockholm.
- Statens Offentliga Utredningar (SOU), (1936:53), *Uttredning angående revision av bestämmelserna om utlännings rätt att här i riket vistas*. Inrikesdepartementet. Stockholm.
- Statens Offentliga Utredningar (SOU), (1967:18) *invandringen problematik och handläggning - utlänningsutredningens betänkande II*, Inrikesdepartementet. Stockholm.
- Statens Offentliga Utredningar (SOU), (1972: 84), *Utlänningsutredningens betänkande V*. Inrikesdepartementet. Stockholm.
- Statens Offentliga Utredningar (SOU), (2002:13) *Vår anhöriginvandring Delbetänkande av Anhörigkommittén*, Inrikesdepartementet. Stockholm.
- Statens Offentliga Utredningar (SOU), 1967:18, 1967. *Invandringens problematik och handläggning - utlänningsutredningens betänkande II*. Inrikesdepartementet. Stockholm.
- Statens Offentliga Utredningar (SOU), 1972: 84. *Utlänningsutredningens betänkande V*. Inrikesdepartementet. Stockholm.
- Stengers, J. (1980). "Belgique. Les Mouvement Migratoires en Belgique aux XIXe et XXe siècles » in Carlsson, S. & Åkerman, S. (red.) (1980). *Les migrations internationales de la fin du XVIIIe siècle à nos jours*. Paris: CNRS
- Stern, J. and G. Valchars (2013). *Country Report: Austria*. EUDO Citizenship Observatory. Available at: <http://eudo-citizenship.eu/admin/?p=file&appl=countryProfiles&f=2013-28-Austria.pdf> [2015-10-05]
- Stern, Joachim & Gerd Valchars, 2013b. *EUDO Citizenship Observatory. Access to electoral rights. Austria*. Available at: <https://web.archive.org/web/20140714223120/http://eudo-citizenship.eu/admin/?p=file&appl=countryProfiles&f=2013-28-Austria.pdf> . Accessed: 2023-07-20.

- Stokes Du-Pass, Nicole, 2015. *Integration and New Limits on Citizenship Rights: Denmark and Beyond*. Basingstoke: Palgrave Macmillan.
- Stokes-Dupass, Nicole, 2017. "Mass Migration, Tightening Borders, and Emerging Forms of Statelessness in Denmark, Norway, and Sweden", *Journal of Applied Security Research*, vol.12, no.1, pp. 40-60.
- Stokholm Banke, C. F. (2005). *Demokratiets skyggeside. Flygtninge og menneskerettigheder i Danmark før Holocaust*. Odense: Syddansk Universitetsforlag.
- Straszer B., (2012), 'Hungarians in Finland and Sweden: Comparison of Some Sociocultural and Demographic Factors on Language Choice, Culture and Identity'. *Finnish Yearbook of Population Research*, XLVII, pp. 5–30.
- Strutz, A., (2016), 'Detour to Canada – The Fate of Juvenile Austrian Refugees after the Anschluss of 1938 in *The Young Victims of the Nazi Regime – Migration, the Holocaust and Postwar Displacement*, ed., Gigliotti S. and Tempian M., Bloomsbury Publishing, London.
- Svanberg I. & Tydén M., (2005), *Tusen år av Invandring – En Svensk Kulturhistoria*, Dialogs förlag,
- Swedish Citizenship Act of 1950 - Lag (1950:382) om svenskt medborgarskap - *Svensk författningssamling* 1950:382
- The Constitution of the Republic of Spain 1931, (2008), [<https://www.scribd.com/document/123469543/Constitution-of-the-Republic-of-Spain-1931>], Published by the Comparative Constitutions Project, [Accessed 2018-06-13].
- The Guardian, 2018. "Protests in Denmark as 'burqa ban' comes into effect". Newsarticle. 2018-08-01. [Electronic]. Available at: <https://www.theguardian.com/world/2018/aug/01/danish-burqa-ban-comes-into-effect-amid-protests>. Accessed: 2019-04-18.
- The Local, 2018. "Denmark's proposal to recruit skilled foreign labour falls apart". Newsarticle. 2018-10-29. [Electronic]. Available at: <https://www.thelocal.dk/20181029/denmarks-proposal-to-recruit-skilled-foreign-labour-falls-apart>. Accessed: 2019-04-18.
- Thomsson, Denise, 2009. "An Institutional Framework of Resettlement" in Pieter, Bevelander, Hagström, Mirjam, & Sofia Rönnqvist (eds.) *Resettled and included? The employment integration of resettled refugees in Sweden*. Malmö Institute for Studies of Migration, Diversity and Welfare (MIM). Malmö: Holmbergs. Pp.29-48. Available at: <https://mau.diva-portal.org/smash/get/diva2:1405336/FULLTEXT01.pdf>. Accessed: 2023-07-20.
- Thorpe, J. (2011), 'Displacing Empire' in *Refugees and the End of Empire - Imperial Collapse and Forced Migration in the Twentieth Century*, ED. Panayi P & Virdee P., Palgrave Macmillan, Basingstoke.
- Thorud E., (1989), *Norsk Innvandringspolitikk 1860-1960*, in Stensilskrift nr 48, Oslo.
- Tjelmland H., (2003), *Del I – 1940-1975*, in 'Norsk Innvandringshistorie Bind 3 – I globaliseringens tid 1940-2000', pp.11-132, eds., Tjelmland H. & Brochmann G., Pax Forlag A/S, Oslo.

- Torpey, J. (2000). *The Invention of the Passport: Surveillance, Citizenship and the State*. Cambridge: Cambridge University Press.
- Torpey, J. (2001). “The Great War and the Birth of the Modern Passport System” in Caplan, J. and J- torpey (2001). *Documenting Individual Identity. The Development of the State Practices in the Modern World*. Princeton: Princeton University Press.
- Torquemada Sánchez, M. J., (2010), *Notas Para El Estudio De La Inmigración Laboral Durante Los Comienzos Del Régimen Franquista*, in *STVDIVM. Revista de Humanidades* 16, pp. 141-162.
- Touzenis K., (2009), ‘Italy’, in *Comparative Study of the Laws in the 27 EU Member States for Legal Immigration*, International Organization for Migration, pp. 337-350.
- UDI, 2017. “Historisk oversigt over lov- og forskriftsendringer” [Electronic], Available at: <https://web.archive.org/web/20170709054331/https://udiregelverk.no/no/rettskilder/prosedyrer-veiledninger/historisk-oversikt-over-lov-og-forskriftsendringer/> Accessed: 2023-07-20.
- Udlændinge-, Integrations- og Boligministeriet, 2016. “Se regeringens stramninger på udlændingeområdet” 2016-08-24. [Electronic]. Available at: <https://www.regeringen.dk/nyheder/2016/flygtningekrisen/se-regeringens-stramninger-paa-udlaendingeomraadet/>. Accessed: 2023-07-20.
- Udvalget for Udlændinge- og Integrationspolitik, 2010. “UUI alm. Del Bilag 91. 2011. Analyse af kvoteflygtninge i Danmark – 2010.” [Electronic]. Available at: <https://www.ft.dk/samling/20101/almDEL/UUI/bilag/5/899166.pdf>. Accessed: 2019-04.30.
- Unemployment Assistance Act, (1933), *Number 46 of 1933 Unemployment Assistance Act*, Available at [<http://www.irishstatutebook.ie/eli/1933/act/46/enacted/en/print>], Accessed 2018-07-26.
- UNHCR Austria. “A long tradition of assisting refugees”, [Electronic]. Available at: my dropbox folder for articles for Austria.
- UNHCR Österreich, 2015. “Subsidiär schutzberechtigzte in Österreich” [Electronic]. Available at: [https://www.unhcr.org/dach/wp-content/uploads/sites/27/2017/03/Bericht\\_subsidiaerer\\_Schutz.pdf](https://www.unhcr.org/dach/wp-content/uploads/sites/27/2017/03/Bericht_subsidiaerer_Schutz.pdf). Accessed: 2019-05-14.
- UNHCR Website = UNHCR. “Resettlement”, [Electronic]. Available at: <https://help.unhcr.org/austria/resettlement/>. Accessed: 2019-05-10.
- UNHCR, (2015), *States Parties to the 1951 Convention relating to the Status of Refugees and the 1967 Protocol*, [<http://www.unhcr.org/protection/basic/3b73b0d63/states-parties-1951-convention-its-1967-protocol.html>] [Accessed 2018-03-15].
- UNHCR, (2018), *Population Statistics*, [<https://www.unhcr.org/refugee-statistics/download/?url=2bxU2f>] Accessed: 2023-07-20.
- UNHCR, 2015. “States Parties to the 1951 Convention relating to the Status of Refugees and the 1967 Protocol”. [Electronic]. Available at: <http://www.unhcr.org/3b73b0d63.html>. Accessed: 2019-04.20.
- UNHCR, 2018. “Belgium by the Government of Belgium”, UNHCR Resettlement Handbook. [Electronic]. Available at: <https://www.unhcr.org/5278adfb9.pdf>. Accessed: 2019-03-20.

- UNHCR, 2018. "Country Chapter Norway. Norway by the Government of Norway". [Electronic]. Available at: <https://www.unhcr.org/3c5e59835.pdf>. Accessed: 2019-05-25.
- United Nations Treaty Series, 1954. "Treaties and international agreements registered or filed and recorded with the Secretariat of the United Nations". [Electronic]. Available at: <https://treaties.un.org/doc/publication/UNTS/Volume%20198/v198.pdf>. Accessed: 2019-04.30.
- Unterwurzacher, Anne, 2017. "'The Other Colleagues' – Labor Migration at the Glanzstoff-Fabrik in St. Pölten from 1962 to 1975", in Bischof, Günter & Kirk Rupnow (eds.) *Migration in Austria*, Contemporary Austrian Studies, Vol 26., Innsbruck University Press: Innsbruck, pp.139-160.
- Vad Jønsson H., & Pedersen K., (2012), *Denmark: A National Welfare State Meets the World*, pp. 97-148, in Immigration Policy and the Scandinavian Welfare State 1945-2010, eds., Brochmann G., & Hagelund A., Palgrave Macmillan, Basingstoke.
- Vad, Jønsson Heidi & Klaus Petersen, 2012. "Denmark: A National Welfare State Meets the World." In Brochmann, Grete & Anniken Hagelund (eds), *Immigration Policy and the Scandinavian Welfare State 1945–2010*. Palgrave Macmillan, London, pp.97-142.
- Vad, Jønsson Heidi & Klaus Petersen, 2012. "Denmark: A National Welfare State Meets the World." In Brochmann, Grete & Anniken Hagelund (eds), *Immigration Policy and the Scandinavian Welfare State 1945–2010*. Palgrave Macmillan, London, pp.97-142.
- Valenta, Marko, 2014. "The Nexus of Asylum Seeker Migrations and Asylum Policy: Longitudinal Analysis of Migration trends in Norway", *International Journal on Minority and Group Rights*, vol. 21, pp.371–394.
- Van Dyk, L (2015). "Gentlemen's Agreement, 1908", *Canadian Museum of Immigration at Pier 21*. Available at: <http://www.pier21.ca/research/immigration-history/gentlemens-agreement-1908> [2016-02-28]
- Vedsted-Hansen J., (1997), *Opholdsret og forsørgelse*, Jurist- og økonomforbundets forlag.
- Vedsted-Hansen, J. (1987). "Forsørgelsesproblemet i fremmedretten" in Blüdnikov, B. (Ed.) (1987). *Fremmede i Danmark. 400 års dremmedpolitik*. Odense: Odense Universitetsforlag.
- Vedsted-Hansen, J. (2006). "Grundbegreber og hovedsondringer i udlændingeretten" in *Udlændingeret*. 3 ed. Copenhagen: Jurist- og Økonomforbundets Forlag.
- Vedsted-Hansen, Jens, 1994. "Legal conditions of refugees in Denmark", *Journal of Refugee Studies*, vol. 7, no.2, pp. 249-259.
- Venken Machteld & Idesbald Goddeeris, 2006. "The Nationalization of Identities Ukrainians in Belgium 1920-1950", *Journal of Ukrainian Studies*, vol.31, no.1-2, pp. 89-115.
- Vivreenbelgique. "Histoire de l'immigration en Belgique au regard des politiques menées". [Electronic]. Available at: <https://web.archive.org/web/20140530162503/https://www.vivreenbelgique.be/11-vivre-ensemble/histoire-de-l-immigration-en-belgique-au-regard-des-politiques-menees>. Accessed: 2023-07-20.

- von Hirschhausen, U., (2009) 'From imperial inclusion to national exclusion: citizenship in the Habsburg monarchy and in Austria 1867–1923' in *Revue européenne d'histoire*, 16(4), pp. 551–573.
- Wadauer, S., (2011), 'Establishing Distinctions: Unemployment versus Vagrancy in Austria from the Late Nineteenth Century to 1938' in *IRSH* 56., pp. 31–70.
- Waldrauch, H. (2006). "Acquisition of Nationality" in Bauböck, R. (2006). *Acquisition and loss of nationality: policies and trends in 15 European states. Vol. 1 Comparative analyses*. Amsterdam: Amsterdam University Press
- Walkobinger, Eva, 1995. "Austria: The danger of Populism", in Baumgartl, Bernd & Adrian Favell (eds.) *New xenophobia in Europe*, London: Kluwer Law International, pp.10-27.
- Wallex – le droit en Wallonie. "7 FÉVRIER 1831. – Constitution de la Belgique". [Electronic]. Available at: <https://wallex.wallonie.be/contents/acts/8/8784/1.html>. Accessed: 2023-07-20.
- Ward E., (1998), 'Ireland and Refugees/Asylum Seekers: 1922 – 1966' in *The Expanding Nation: Towards A Multi-Ethnic Ireland Proceedings Of A Conference Held In Trinity College Dublin, 22-24 September 1998*.
- Weil, Patrick (2003). "Racial Distinctions in French and U.S. Immigration Policies" in Fahrmeir, Andreas, Olivier Faron and Patrick Weil (eds) *Migration Control in the North Atlantic World*. Pp. 120-137. Oxford: Berghahn Books.
- Westin, Charles, 2006. "Sweden: Restrictive Immigration Policy and Multiculturalism", Migration Information Source Country Profile. Washington, DC: Migration Policy Institute. [Electronic]. Accessed on: <http://www.migrationpolicy.org/article/sweden-restrictive-immigration-policy-and-multiculturalism> Accessed: 2019-05-27.
- Willerslev, R. (1983). *Den glemte indvandring. Den svenske indvandring til Danmark 1850–1914*. Copenhagen: Gyldendalske Boghandel, Nordisk Forlag A. S.
- Yad Vashem, (2018), *Spain*, SOAH Resource Centre, The International School for Holocaust Studies [[http://www.yadvashem.org/odot\\_pdf/Microsoft%20Word%20-%2006034.pdf](http://www.yadvashem.org/odot_pdf/Microsoft%20Word%20-%2006034.pdf)], [Accessed 2018-06-13].
- Yante, Jean-Marie, 2010. "Management of Migration flows in Belgium (19<sup>th</sup> – 20<sup>th</sup> Centuries): from an emigrant country to a country welcoming immigration" in Peri.E Arnold (ed) *National approaches to the Administration of International Migration*, Amsterdam, Washington D.C: IOS press, pp.53-64.
- Zieck, Marjoleine, 2013. "The 1956 Hungarian Refugee Emergency, an Early and Instructive Case of Resettlement", *Amsterdam Law Forum*, vol. 5 no. 2, pp.45-63.
- Zincone G., (2006), *Italian immigrants and immigration policy-making: Structures, actors and practices*, IMISCOE Working Paper, IMISCOE.
- Zincone G., and Basili M., (2009), *EUDO Citizenship Observatory -Country Report: Italy*, European University Institute, San Domenico di Fiesole.

Zincone, G. (2006). "Italian Immigrants and Immigration Policy-Making: Structures, Actors and Practices". IMISCOE Working Paper. Available at: [https://ec.europa.eu/migrant-integration/sites/default/files/2008-08/doc1\\_1456\\_723642390.pdf](https://ec.europa.eu/migrant-integration/sites/default/files/2008-08/doc1_1456_723642390.pdf). Accessed: 2023-07-20.

Zip Sane H., (2000), *Billige og villige? Fremmedarbejdere i fædrelandet ca. 1800-1970*, Farums Arkiver & Museer, Farum.

Zip Sane, H., (1999) 'Medborgarskabet fødes. Udvisningspraksis i Danmark 1875–1915'. in *Historisk tidskrift*, 99(1), pp. 1–32.

Zolberg, A. R. (2007). "The Exit Revolution" in Green, N. L. and F. Weil (ed.) *Citizenship and Those Who Leave. The Politics of Emigration and Expatriation*. Illinois: University of Illinois press.

### **Sources used by Peters**

Adams B. 2007. Korea needs to open its doors. *JoongAng Daily* 22.

Addleton JS. 1992. *Undermining the Centre: The Gulf Migration and Pakistan*. Oxford University Press, Karachi

Adelman J. 1994. *Frontier Development: Land, Labour, and Capital on the Wheatlands of Argentina and Canada, 1890-1914*. Oxford: Oxford University Press

Adepoju A. 1988. International migration in Africa south of the Sahara. In *International Migration Today*, Vol. 1, pp. 17–88. Paris: United Nations Educational, Scientific, and Cultural Organization and the University of Western Australia

Afonso A. 2005. When the Export of Social Problems Is No Longer Possible: Immigration Policies and Unemployment in Switzerland. *Social Policy & Administration*. 39(6):653–668

Alabaster CG, de Mello A, Koenig E. 1915. Eastern Colonies. *Journal of the Society of Comparative Legislation*. 15:14–26

Albarracín J. 2003. Explaining Immigration Policies in Argentina during the 1990s: European Immigration, 'a Marriage in Sickness and in Health.' *XXIV Congreso Internacional de LASA*. Dallas, TX: LASA

Alessa SY. 1981. *The Manpower Problem in Kuwait*. London: Kegan Paul International

Al-ramadhan MA. 1995. New population policy in Kuwait: the quest for a balance in the population composition. *Population bulletin of ESCWA*. (43):29

Al-Salem F, Farah T, Al-Salem M. 1980. Alienation and Expatriate Labor in Kuwait. *Journal of South Asian and Middle Eastern Studies*. 4(1):3–37

Amaral EF, Fusco W. 2005. *Shaping Brazil: The Role of International Migration*. Work. Pap.

Anderson BJ. 1993. The Restoration of the South African Citizenship Act: An Exercise in

- Statutory Obfuscation. *Conn. J. Int'l L.* 9:295
- Appleyard RT. 1988. International migration in Asia and the Pacific. *International Migration Today*. 1:89–167
- Argast R. 2009. An unholy alliance: Swiss citizenship between local legal tradition, federal laissez-faire, and ethno-national rejection of foreigners 1848-1933. *European Review of History: Revue europeenne d histoire*. 16(4):503–521
- Athukorala P. 1993. International Labour Migration in the Asian Pacific Region: patterns, policies and economic implications\*. *Asian Pacific Economic Literature*. 7(2):28–57
- Avni H. 1991. *Argentina & The Jews*. Tuscaloosa: The University of Alabama Press
- Bade KJ. 1987. Labour, Migration, and the State: Germany from the Late 19th Century to the Onset of the Great Depression. In *Population, Labour, and Migration in 19th- and 20th- Century Germany*, pp. 59–86. New York: St. Martin's Press, Inc.
- Bailey MA, Goldstein JL, Weingast BR. 1997. The Institutional Roots of American Trade Policy: Politics, Coalitions, and International Trade. *World Politics*. 49(3):309–338
- Baily SL. 1969. The Italians and the Development of Organized Labor in Argentina, Brazil, and the United States 1880-1914. *Journal of Social History*. 3(2):123–134
- Baldwin-Edwards M, Schain M. 1994. *The Politics of Immigration in Western Europe*. Newbury Park, Ilford, Essex: Frank Cass
- Barnhart EN. 1962. Citizenship and Political Tests in Latin American Republics in World War II. *The Hispanic American Historical Review*. 42(3):297–332
- Bastos de Ávila F. 1954. *Economic Impacts of Immigration; The Brazilian Immigration Problem*. The Hague: M. Nijhoff
- Bastos de Ávila F. 1964. *Immigration in Latin America*. Washington, DC: OAS
- Beaglehole A. 1990. *A Small Price to Pay: Refugees from Hitler in New Zealand, 1936-46*. Wellington: Allen & Unwin
- Beaglehole A. 2009. Looking back and glancing sideways: refugee policy and multicultural nation-building in New Zealand. In *Does History Matter?: Making and Debating Citizenship, Immigration and Refugee Policy in Australia and New Zealand*, p. 105. Canberra: Australia National University EPress
- Beattie Jr CS. 1983. The 1980 Lei do Estrangeiro: The Return of Traditional Defenses against Expulsion in Brazilian Immigration Law. *Tex. Int'l LJ*. 18:151
- Bedford R. 2004. The quiet revolution: Transformations in migration policies, flows and outcomes, 1999-2004. *New Zealand Geographer*. 60(2):58–62
- Bedford R. 2005. International Migration and Globalization: the transformation of New

- Zealand's migration system since the mid-1980s. In *Sovereignty under Siege? Globalisation and New Zealand*. Burlington, VT: Ashgate Publishing Company. 2005th ed.
- Bedford R, Ho E, Lidgard J. 2000. International migration in New Zealand: Context, components and policy issues. *Population Studies Centre Discussion Paper*. (37):
- Bergier JF, Bartoszewski W, Friedländer S, James H, Junz HB, et al. 2002. *Switzerland, National Socialism, and the Second World War: Final Report*. Work. Pap.
- Bhatti FM. 2007. *East Indian Immigration Into Canada: 1905-1973*. Lahore, Pakistan: Pakistan Study Centre, University of Punjab
- Binzegger A. 1980. *New Zealand's Policy on Refugees*. New Zealand Institute of International Affairs
- Birks JS, Sinclair CA. 1979. *International Migration Project, Country Case Study: Saudi Arabia*. Durham: University of Durham
- Bitar M. 2008. *Unprotected Among Brothers: Palestinians in the Arab World*. Work. Pap., Oxford
- Blainey G. 1984. *All for Australia*. North Ryde: Methuen Haynes
- Böhning WR. 1984. *Studies in International Labor Migration*. London: Macmillan
- Böhning WR, Maillat D. 1974. *The Effects of the Employment of Foreign Workers*. Paris: Organisation for Economic Co-operation and Development
- Booth H. 1992. *The Migration Process in Britain and West Germany : Two Demographic Studies of Migrant Populations*. Aldershot, Hants, England: Avebury
- Borrie WD. 1991. *Immigration to New Zealand, 1854-1938*. Canberra: Demography Program, Research School of Social Sciences, Australian National University
- Borrie WD. 1994. *The European Peopling of Australia: A Demographic History, 1788-1988*. Canberra: Demographic Program, Research School of Social Sciences, The Australian National University
- Bouillon A. 1998. 'New' African Immigration to South Africa.' Work. Pap.
- Boyd M, Vickers M. 2000. 100 Years of Immigration in Canada. *Canadian Social Trends*. 2-12
- Bradlow E. 1978. *Immigration into the Union, 1910-1948: policies and attitudes*. PhD Thesis thesis. University of Cape Town, History
- Brawley S. 1993. No 'White Policy' in NZ: Fact and Fiction in New Zealand's Asian Immigration Record, 1946-1978.' *New Zealand Journal of History*. 27(1):85-100



- Breytenbach WJ. 1979. *Migratory Labour Arrangements in Southern Africa*. Pretoria, South Africa: Africa Institute of South Africa. Revised ed.
- Brody B. 2002. *Opening the Door: Immigration, Ethnicity, and Globalization in Japan*. New York: Routledge
- Brown BB. 1987. Facing the 'Black Peril': The politics of population control in South Africa.' *Journal of Southern African Studies*. 13(2):256–273
- Browne GP. 1972. *Government immigration policy in imperial Brazil, 1822-1870*. Catholic University of America
- Bureš J. 2008. *Main Characteristic and Development Trends of Migration in the Arab World*. Prague: Institute of International Relations
- Caestecker F, Moore B. 2010. The legal construction of policy towards aliens prior to 1933. *Refugees from Nazi Germany and the Liberal European States*. 193
- Caestecker F, Moore B. 2011. Female domestic servants as desirable refugees: Gender, labour needs and immigration policy in Belgium, The Netherlands and Great Britain. *European History Quarterly*. 41(2):213
- Carrothers WA. 1966. *Emigration from the British Isles, with Special Reference to the Development of the Overseas Dominions*. New York: A.M. Kelley
- Castro DS. 1971. *The Development of Argentine Immigration Policy, 1852-1914*. Los Angeles: University of California Press
- Castro MJ. 1999. Toward a New Nativism? The Immigration Debate in the United States and Its Implications for Latin America and the Caribbean. In *Free Markets, Open Societies, Closed Borders? Trends in International Migration and Immigration Policy in the Americas*. Miami: North-South Center Press
- Chalcraft J. 2010. *Monarchy, migration and hegemony in the Arabian Peninsula*. Work. Pap.
- Chang HF. 2002. Liberal Ideals and Political Feasibility: Guest-Worker Programs as Second-Best Policies. *Immigr. & Nat'lity L. Rev.* 23:339
- Chen AH. 1987. The Development of Immigration Law and Policy: The Hong Kong Experience. *McGill LJ*. 33:631
- Choi JH. 2001. International Migration, Human Resource Development and Migration Policy in Korea. *Asia and Pacific Migration Journal*. 10(3–4):463–483
- Choucri N. 1977. The new migration in the Middle East: A problem for whom? *International Migration Review*. 11(4):421–443
- Choucri N. 1986. Asians in the Arab world: labor migration and public policy. *Middle Eastern Studies*. 22(2):252–273

- Choucri N, Brecke P. 1983. *Migration in the Middle East: Transformations, Policies, and Processes*. Cambridge, MA: Technology Adaption Program, Massachusetts Institute of Technology
- Christopher AJ. 1971. Colonial Land Policy in Natal. *Annals of the Association of American Geographers*. 61(3):560–575
- Chu Y, Lin J. 2001. Political development in 20th-century Taiwan: State-building, regime transformation and the construction of national identity. *The China Quarterly*. 165(1):102–129
- Chui E. 2002. Housing and Welfare Services in Hong Kong for New Immigrants from China: Inclusion or Exclusion? *Asia and Pacific Migration Journal*. 11(2):221–245
- Chung EA. 2010. *Immigration and Citizenship in Japan*. Cambridge: Cambridge University Press
- Citizenship and Immigration Canada. 2006. Forging Our Legacy: Canadian Citizenship and Immigration, 1900-1977
- Clarke SF. 1990. *Immigration of Workers into Australia, Canada, Sweden and the United Kingdom*. Washington D.C.: American-British Law Division, Law Library of Congress
- Colijn I, Smit H. 1994. The Labour Market and Minorities in the Nineties. In *Immigrant Ethnic Minorities in the Dutch Labour Market: Analysis and Policies*, pp. 135–148. Amsterdam: Thesis Publishers
- Congressional Quarterly. 2006a. *Immigration, 2001-2002 Legislative Chronology*. CQ Press
- Congressional Quarterly. 2006b. *War Supplemental Has Strings Attached*. Congressional Quarterly
- Corbett DC. 1957. *Canada's Immigration Policy; A Critique*. Toronto: Published under the auspices of the Canadian Institute of International Affairs by University of Toronto Press
- Cornelius WA, Weiner M, Hanami T. 1998. *Appearances and Realities: Controlling Illegal Immigration in the United States*. Macmillan Press Ltd
- Cross GS. 1983. *Immigrant Workers in Industrial France: The Making of a New Laboring Class*. Temple University Press
- Crush JS. 1997. *Covert Operations: Clandestine Migration, Temporary Work, and Immigration Policy in South Africa*. Work. Pap.
- Crush JS. 2000. Introduction: Making Hay with Foreign Farmworkers. In *Borderline Farming: Foreign Migrants in South African Commercial Agriculture*, pp. 1–13. Cape Town: IDASA

- Crush JS. 2011. South Africa: Policy in the face of xenophobia
- Crush JS, Jeeves A, Yudelman D. 1991. *South Africa's Labor Empire: A History of Black Migrancy to the Gold Mines*. Boulder: Westview Press
- Crush JS, Mather C. 2000. *Borderline Farming: Foreign Migrants in South African Commercial Agriculture*. Cape Town: IDASA
- Crush JS, McDonald DA. 2002. *Transnationalism and New African Immigration to South Africa*. Cape Town: The Southern African Migration Project (SAMP) and the Canadian Association for African Studies (CAAS)
- Crush JS, Tshitereke C. 2001. Contesting Migrancy: The Foreign Labor Debate in Post-1994 South Africa. *Africa today*. 49–70
- de Groot GR. 2001. Access to Citizenship for Aliens in the Netherlands. In *Citizenship in a Global World: Comparing Citizenship Rights for Aliens*. New York: Palgrave
- de la Torre A, Mendoza J. 2007. A Comparative Analysis of Immigration Law in the US and Argentina. *Am U. Modern Am*. 3:46–83
- de Lepervanche M. 1975. Australian Immigrants, 1788-1940: Desired and Unwanted. In *Essays in the Political Economy of Australian Capitalism*, pp. 72–104. Sydney: Australia and New Zealand Book Company
- Dean W. 1971. Latifundia and Land Policy in Nineteenth-Century Brazil. *The Hispanic American Historical Review*. 51(4):606–625
- Department of Immigration, Local Government and Ethnic Affairs. 1988a. *Australia and Immigration*. Canberra: Australian Government Publishing Service
- Department of Immigration, Local Government and Ethnic Affairs. 1988b. *Australia and Immigration*. Canberra: Australian Government Publishing Service
- Dialogue M. 1994a. *Migration News*. University of California, Davis; German Marshall Fund of the United States, and the University of California - Berkeley Center for German and European Studies
- Dialogue M. 1994b. *Migration News*. Davis, CA: University of California, Davis; German Marshall Fund of the United States, and the University of California - Berkeley Center for German and European Studies
- Dialogue M. 1994c. *Migration News*. Davis, CA: University of California, Davis; German Marshall Fund of the United States, and the University of California - Berkeley Center for German and European Studies
- Dialogue M. 1994d. *Migration News*. Davis, CA: University of California, Davis; German Marshall Fund of the United States, and the University of California - Berkeley Center for German and European Studies



for German and European Studies

- Dib G. 1988. Laws governing migration in some Arab countries. In *International Migration Today*, Vol. 1, pp. 168–879. Paris: United Nations Educational, Scientific, and Cultural Organization and the University of Western Australia
- Duly LC. 1968. *British Land Policy at the Cape, 1795-1844: A Study of Administrative Procedures in the Empire*. Durham, N.C.: Duke University Press
- Earth Times. 2009. Taiwan to give asylum to Chinese dissidents under amended law. *Earth Times*
- Einaudi L. 2007. *Le Politiche Dell'immigrazione in Italia Dall'Unità a Oggi*. Roma-Bari: Laterza
- Engerman SL, Sokoloff KL. 2008. Once upon a time in the Americas: land and immigration policies in the New World. National Bureau of Economic Research, Boston
- Entzinger H. 1994a. Changing Policy Approaches and Scenarios for the Future. In *Immigrant Ethnic Minorities in the Dutch Labour Market: Analysis and Policies.*, pp. 149–166. Amsterdam: Thesis Publishers
- Entzinger H. 1994b. Shifting Paradigms: An Appraisal of Immigraiton in the Netherlands. In *European Migration in the Late Twentieth Century, Historical Patterns, Actual Trends and Social Implications*, pp. 93–112. Aldershot: Edward Elgar Publishing Limited
- Ersanilli E. 2007. Focus-Migration: The Netherlands
- Farmer RSJ. 1996. Economic Deregulation and Changes in New Zealand's Immigration Policy: 1986 to 1991. *People and Place*. 4(3):
- Farmer RSJ. 1997. New Zealand's 'targeted' immigration policy, 1991 to 1996. *People and Place*. 5(1):
- Fausto B. 1999. *A Concise History of Brazil*. Cambridge: Cambridge University Press
- Feiler G. 1991. Migration and recession: Arab labor mobility in the Middle East, 1982-89. *Population and Development Review*. 17(1):134–155
- Feinstein CH. 2005. *An Economic History of South Africa: Conquest, Discrimination and Development*. Cambridge Univ Pr
- Fields H. 1932. Closing Immigration Throughout the World. *Am. J. Int'l L.* 26:671
- Fischel de Andrade JH. 1998. Regional policy approaches and harmonization: A Latin American perspective. *International Journal of Refugee Law*. 10(3):389
- Fischel de Andrade JH. 2011. Brazil and the International Refugee Organization (1946-1952). *Refugee Survey Quarterly*. 30(1):65

- Fischer A, Nicolet S, Sciarini P. 2002. Europeanisation of a non-EU country: The case of Swiss immigration policy. *West European Politics*. 25(4):143–170
- Fitzgerald D. 2006. Inside the Sending State: The Politics of Mexican Emigration Control. *International Migration Review*. 40(2):259–93
- Fluckiger Y. 1998. The labour market in Switzerland: The end of a special case? *International Journal of Manpower*. 19(6):369–395
- Foerster RF. 1919. *The Italian Emigration of Our Times*. Harvard university press
- Fong PE, Lim L. 1982. Foreign labor and economic development in Singapore. *International Migration Review*. 16(3):548–576
- Foote DH. 1993. Japan's Foreign Workers Policy: A View from the United States. *Geo. Immigr. LJ*. 7:707
- Foster J. 2003. 'Land of Contrasts' or 'Home We Have Always Known'? The SAR&H and the Imaginary Geography of White South African Nationhood, 1910-1930." *Journal of Southern African Studies*. 29(3):657–680
- Francis A. 2006. Anti-Alienism in New Zealand during the Great War: The von Zedlitz Affair, 1915. *Immigrants & Minorities*. 24(3):251–276
- Freeman GP. 1989. Immigrant labour and racial conflict: The role of the state. In *Migrants in Modern France: Population Mobility in the Later Nineteenth and Twentieth Centuries*, pp. 160–176. London: Unwin Hyman
- Freeman GP, Jupp J. 1992. *Nations of Immigrants: Australia, the United States, and International Migrants*. Oxford University Press
- Frey M. 1987. Swiss asylum law: Recent changes. *Geo. Immigr. LJ*. 2:439
- Friman HR. 2002. Evading the Divine Wind Through the Side Door: The Transformation of Chinese Migration to Japan. In *Globalizing Chinese Migration: Trends in Europe and Asia*, pp. 9–33. Burlington, VT: Ashgate Publishing Company
- Fullerton M. 1988. Restricting the flow of asylum-seekers in Belgium, Denmark, the Federal Republic of Germany, and the Netherlands: New challenges to the Geneva Convention Relating to the Status of Refugees and the European Convention on Human Rights. *Va. J. Int'l L*. 29:33
- Gallienne R. 1991. *The Whole Thing Was Orchestrated: New Zealand's Response to the Indo-Chinese Refugees Exodus, 1975 to 1985*, Vol. 2. University of Auckland, Centre for Asian Studies (Auckland)
- GAO. 2010. Humanitarian Assistance: Status of North Korean Refugee Resettlement and Asylum in the United States. *GAO-10-691*, Government Accountability Office
- Garcia MJ, Lee MM, Tatelman T. 2005. *Immigration: Analysis of the Major Provisions of*

- H.R. 418, the REAL ID Act of 2005*. Congressional Research Service
- Geddes A. 2003. *The Politics of Migration and Immigration in Europe*. London: SAGE Publications
- Gemery HA, Hatton TJ, Williamson JG. 1994. *Immigrants and Emigrants: International Migration and the US Labor Market in the Great Depression*. Routledge
- Germani G. 1970. Mass immigration and modernization in Argentina. In *Masses in Latin America*, pp. 289–330. New York: Oxford University Press
- Gibney MJ, Hansen R. 2005. *Immigration and Asylum from 1900 to the Present*. ABC-CLIO
- Gibney MJ, Hansen R, Credo R. 2005. *Immigration and Asylum from 1900 to the Present*. Santa Barbara, CA: ABC-CLIO
- Gieler W. 2003. *Handbuch Der Ausländer-Und Zuwanderungspolitik*. Münster: Lit-Verl.
- Government of Argentina. 1869. Citizenship and Nationality [Argentina]
- Government of Argentina. 1981. Migration and Immigration Promotion [Argentina]
- Government of Argentina. 1994. Migration Regulations [Argentina]
- Government of Argentina. 2004. Citizenship [Argentina]
- Government of Australia. 2007. Citizenship Act 2007 (as amended up to Act No. 51 of 2010) [Australia]
- Government of Brazil. 1980. Foreigners Law of 1980 (Brazil)
- Government of Canada. 1976. Immigration Act, 1976-77 [Canada]
- Government of Germany. 2011. German Interior Ministry
- Government of Hong Kong. 1853. The Aliens (Rights of Property) Ordinance, 1853 (Hong Kong)
- Government of Hong Kong. 1895. The Chinese Immigration Ordinance, 1895, of Hong Kong
- Government of Hong Kong. 1902. Relating to the Naturalization fo Aliens of Hong Kong
- Government of Hong Kong. 1914. Hong Kong Legislative Council Minutes, 20 August 1914
- Government of Hong Kong. 1915. Hong Kong Legislative Council Minutes, 30 December 1915
- Government of Hong Kong. 2008a. Frequently Asked Questions: New Amendments to the Rules for Capital Investment Entrant Scheme

- Government of Hong Kong. 2008b. Immigration Guidelines for Entry to the Hong Kong Special Administrative Region of the People's Republic of China
- Government of Hong Kong. 2008c. Quality Migrant Admission Scheme: Entry of Dependents
- Government of Hong Kong. 2008d. Quality Migrant Admission Scheme: General Points Test
- Government of Hong Kong. 2008e. Quality Migrant Admission Scheme: Prerequisites
- Government of Hong Kong. 2008f. Quality Migrant Admission Scheme: Scheme Objective
- Government of Hong Kong. 2008g. Quality Migrant Admission Scheme: Scope of the Scheme
- Government of Hong Kong. 2008h. Visa Information for Non-Local Graduates. Hong Kong Visa Handbook, Hong Kong
- Government of New Zealand. 1982. Citizenship (Western Samoa) Act 1982 [New Zealand]
- Government of New Zealand. 2002. Immigration Act 2002 [New Zealand]
- Government of New Zealand. 2004. *Migration Trends 2003/2004*. Wellington: Department of Labour, Government of New Zealand
- Government of New Zealand. 2005. *Migration Trends 2004/2005*. Wellington: Department of Labour, Government of New Zealand
- Government of New Zealand. 2006. *Migration Trends 2005/2006*. Wellington: Department of Labour, Government of New Zealand
- Government of New Zealand. 2007. *Migration Trends 2006/2007*. Wellington: Department of Labour, Government of New Zealand
- Government of New Zealand. 2008. *Migration Trends 2007/2008*. Wellington: Department of Labour, Government of New Zealand
- Government of New Zealand. 2009. *Migration Trends 2008/2009*. Wellington: Department of Labour, Government of New Zealand
- Government of New Zealand. 2010a. *Immigration Act 2009: Appeals*. Wellington: Department of Labour, Government of New Zealand
- Government of New Zealand. 2010b. *Immigration Act 2009: Deportation*. Wellington: Department of Labour, Government of New Zealand
- Government of New Zealand. 2010c. *Immigration Act 2009: Employer Obligations*. Wellington: Department of Labour, Government of New Zealand
- Government of New Zealand. 2010d. *Immigration Act 2009: Refugee and Protection Status Determinations*. Wellington: Department of Labour, Government of New Zealand



- Government of New Zealand. 2010e. *Immigration Act 2009: Sponsorship*. Wellington: Department of Labour, Government of New Zealand
- Government of New Zealand. 2010f. *Immigration Act 2009: Summary of Key Changes*. Wellington: Department of Labour, Government of New Zealand
- Government of New Zealand. 2010g. *Migration Trends 2009/2010*. Wellington: Department of Labour, Government of New Zealand
- Government of Singapore. 2011. ICA - Apply for Singapore Citizenship
- Government of South Africa. 1949. South African Citizenship Act, 1949 [South Africa]
- Government of South Africa. 1991. Aliens Control Act, 1991 [South Africa]
- Government of South Africa. 1995. South Africa Citizenship Act, 1995 [South Africa]
- Government of South Africa. 2005. Immigration Regulations [South Africa]
- Government of the Republic of China. 1990. AIDS Prevention and Control Act [Republic of China]
- Government of the Republic of China. 1992. Operation Directions for Foreign Professionals Applying for the Employment PASS Card [Republic of China]
- Government of the Republic of China. 2002. 2002 Immigration Law [Republic of China]
- Government of the Republic of China. 2003. 2003 Employment Services Law [Republic of China]
- Government of the Republic of China. 2006. 2006 Nationality Law [Republic of China]
- Government of the Republic of China. 2007. 2007 Immigration Act [Republic of China]
- Government of the Republic of China. 2009a. Amended Articles 6, 12 and 17 of the Regulations Governing Visiting, Residency and Permanent Residency of Aliens [Republic of China]
- Government of the Republic of China. 2009b. Review Criteria for the Cases Stated in Subparagraphs 13 and 15, Paragraph 1, Article 18 of the Immigration Act [Republic of China]
- Government of the Republic of China. 2010a. Alien Entry Prohibition Operation Directions [Republic of China]
- Government of the Republic of China. 2010b. Criteria Governing Cases of Subparagraph 13 and 15, Paragraph 1, Article 18 of the Immigration Act [Republic of China]
- Government of the Republic of China. 2010c. Enforcement Rules of the Nationality Act [Republic of China]

- Gravil R. 1985. *The Anglo-Argentine Connection, 1900-1939*. Boulder: Westview Press
- Green AG, Hatton TJ, Williamson JG. 1994. International Migration and the Evolution of Prairie Labor Markets in Canada, 1900-1930. In *Migration and the International Labor Market, 1850-1939*, pp. 156–174. London: Routledge
- Gurowitz A. 2004. International law, politics, and migrant rights. In *The Politics of International Law*, Vol. 51, p. 131. Cambridge: Cambridge University Press
- Hall MM. 1969. *The Origins of Mass Immigration in Brazil, 1871-1914*. PhD Thesis thesis. Columbia University, Department of Political Science
- Halliday F. 1977. Migration and the Labor Force in the Oil Producing States of the Middle East. *Development and Change*. 8(Summer):263–292
- Hammar T, ed. 1985. *European Immigration Policy: A Comparative Study*. Cambridge: Cambridge University Press
- Hanami T, Weiner M, Hanami T. 1998. Japanese Policies on the Rights and Benefits Grated to Foreign Workers, Residents, Refugees and Illegals. In *Temporary Workers or Future Citizens? Japanese and U.S. Migration Policies*, pp. 211–237. London: Macmillan Press Ltd
- Hastings D. 1969. Japanese Emigration and Assimilation in Brazil. *International Migration Review*. 3(2):32–53
- Hattersley AF. 1950. *The British Settlement of Natal: A Study in Imperial Migration*. Cambridge, England: University Press
- Hatton TJ. 2004. Emigration from the UK, 1870-1913 and 1950-1998. *European Review of Economic History*. 8:149--169
- Hawke GR. 1985. *The Making of New Zealand: An Economic History*. Cambridge: Cambridge University Press
- Hawkins F. 1972. *Canada and Immigration: Public Policy and Public Concern*. Toronto: Institute of Public Administration of Canada ; McGill-Queen's University Press
- Hawkins F. 1991. *Critical Years in Immigration Canada and Australia Compared*. Kingston, ON: McGill-Queen's University Press
- Hayden AA. 1971. New South Wales Immigration Policy, 1856-1900. *Transactions of the American Philosophical Society*. 61(5):1–60
- Henry M. 2008. Border geostrategies: Imagining and administering New Zealand's post World War One borders. *New Zealand Geographer*. 64(3):194–204
- Herbert U. 1990. *A History of Foreign Labor in Germany, 1880-1990: Seasonal Workers, Forced Laborers, Guest Workers*. Ann Arbor. MI: University of Michigan Press

- Hines B. 1999. An Overview of Argentine Immigration Law. *Ind. Int'l & Comp. L. Rev.* 9:395–573
- Hines B. 2010. The Right to Migrate as a Human Right: The Current Argentine Immigration Law. *Cornell Int'l LJ.* 43:471–611
- Hoffmann-Nowotny HJ. 1995. Switzerland: A non-immigration immigration country. In *The Cambridge Survey of World Migration*, pp. 302–07. Cambridge: Cambridge University Press
- Hoffmann-Nowotny HJ, McNeill WH, Adams R. 1978. European Migration after World War II. In *Human Migration: Patterns and Policies*, pp. 85–105. Bloomington, IN: Indiana University Press
- Holloway TH. 1978. Creating the Reserve Army? The Immigration Program of Sao Paulo, 1886-1930. *International Migration Review.* 12(2):187–209
- Holloway TH. 1980. *Immigrants on the Land: Coffee and Society in Sao Paulo, 1886-1934.* Chapel Hill: University of North Carolina Press
- Holmes M. 1988. *Forgotten Migrants: Foreign Workers in Switzerland before World War I.* Rutherford, NJ: Fairleigh Dickinson Univ Pr
- Holzer T, Schneider G, Widmer T. 2000. Discriminating decentralization: Federalism and the handling of asylum applications in Switzerland, 1988-1996. *The Journal of Conflict Resolution.* 44(2):250–276
- Horowitz DL, Noiriel G. 1992. *Immigrants in Two Democracies: French and American Experience.* New York: New York University Press
- Hsia HC. 2004. Prospects and Impass of Multicultural Citizenship in the Era of Globalization: The Case of Immigrant Movement in Taiwan. *International Conference on Political Challenges and Democratic Institutions, Organized by Department of Political Science, National Taiwan University*
- Hsieh C, Kuo D. 2009. Refugee Draft Bill Passed. *Girdline Magazine*
- Hui WT. 1997. Regionalization, Economic Restructuring and Labour Migration in Singapore. *International Migration.* 35(1):109–130
- Hui WT. 1998. The regional economic crisis and Singapore: Implications for labor migration. *Asian and Pacific Migration Journal.* 7:187–218
- Hulse C. 2010. HIV Positive? South Korea Will Happily Deport You!
- Human Rights Watch. 2010. *Walls at Every Turn: Abuse of Migrant Domestic Workers through Kuwait's Sponsorship System.* New York: Human Rights Watch
- Hutchinson EP. 1981. *Legislative History of American Immigration Policy, 1798-1965.* University of Pennsylvania Press

- Iguchi Y. 1998. What We Can Learn from the German Experiences Concerning Foreign Labor. In *Temporary Workers or Future Citizens? Japanese and U.S. Migration Policies*, pp. 293–318. London: Macmillan Press Ltd
- Iguchi Y, Weiner M, Hanami T. 1998. What We Can Learn from the German Experiences Concerning Foreign Labor. In *Temporary Workers or Future Citizens? Japanese and U.S. Migration Policies*, pp. 293–318. London: Macmillan Press Ltd
- Iza AO. 1994. Asylum and Refugee Procedure in the Argentine Legal System, The. *Int'l J. Refugee L.* 6:643
- James WG. 1992. *Our Precious Metal: African Labour in South Africa's Gold Industry, 1970-1990*. Bloomington, IN: Indiana University Press
- Jeeves A. 1985. *Migrant Labour in South Africa's Mining Economy: The Struggle for the Gold Mines' Labour Supply, 1890-1920*. Kingston, ON: McGill-Queen's University Press
- Jeeves A, Crush JS. 1997. *White Farms, Black Labor: The State and Agrarian Change in Southern Africa, 1910-50*. Pietermaritzburg, South Africa: University of Natal Press
- Jefferson M. 1926. *Peopling the Argentine Pampa*. New York: American Geographical Society
- Jenks RE. 1993. Immigration and nationality policies of leading migration nations. *Population and Environment.* 14(6):567--592
- Joppke C, Rosenhek Z. 2003. Contesting ethnic immigration: Germany and Israel compared. *European Journal of Sociology.* 43(03):301–335
- Jubilut LL. 2006. Refugee Law and Protection in Brazil: a Model in South America? *Journal of Refugee Studies.* 19(1):22
- Jubilut LL, de Oliveira Selmi Apolinário SM. 2008. Refugee Status Determination in Brazil: A Tripartite Enterprise. *Refuge: Canada's periodical on refugees.* 25(2):
- Junichi A. 2006. Challenging Japan's Refugee Policies. *Asia and Pacific Migration Journal.* 15(2):219–238
- Jupp J. 2002a. *From White Australia to Woomera: The Story of Australian Immigration*. New York: Cambridge University Press
- Jupp J. 2002b. *From White Australia to Woomera: The Story of Australian Immigration*. New York: Cambridge University Press
- Kajita T, Weiner M, Hanami T. 1998. The Challenge of Incorporating Foreigners in Japan: 'Ethnic Japanese' and "Sociological Japanese". In *Temporary Workers or Future Citizens? Japanese and U.S. Migration Policies*, pp. 120–147. London: Macmillan Press Ltd

- Kang SD. 1996. Typology and conditions of migrant workers in South Korea. *Asian and Pacific Migration Journal*. 5(2–3):265
- Kanjanapan W. 1992. White-collar foreign workers in Republic of China. *Asian and Pacific migration journal: APMJ*. 1(3–4):569
- Kanovsky E. 1984. *Migration from the Poor to the Rich Arab Countries*. Tel Aviv: Dayan Center for Middle Eastern and African Studies, Shiloah Institute, Tel Aviv University
- Kapiszewski A. 2001a. *Nationals and Expatriates: Population and Labour Dilemmas of the Gulf Cooperation Council States*. Ithaca
- Kapiszewski A. 2001b. *Nationals and Expatriates: Population and Labour Dilemmas of the Gulf Cooperation Council States*. Reading: Ithaca Press
- Kapiszewski A. 2006. Arab versus Asian migrant workers in the GCC countries. *Work*
- Kaur A. 2006. *International Migration in Malaysia and Singapore since the 1880s: State Policies, Migration Trends and Governance of Migration*. New England, NSW: The University of New England Asia Centre (UNEAC) for the Malaysia and Singapore Society of Australia
- Kay D, Miles R. 1988. Refugees or Migrant Workers? The Case of the European Volunteer Workers in Britain (1946-1951). *Journal of Refugee Studies*. 1(3–4):214
- Kaye R. 1994. Defining the agenda: British refugee policy and the role of parties. *Journal of Refugee Studies*. 7(2–3):
- Kaye R, Charlton R. 1990. *United Kingdom Refugee Admission Policy and the Politically Active Refugee*. Centre for Research in Ethnic Relations, University of Warwick
- Kelley AC. 1965. International Migration and Economic Growth: Australia, 1865-1935. *The Journal of Economic History*. 25(3):333–354
- Kelley N, Trebilcock MJ. 1998. *The Making of the Mosaic: A History of Canadian Immigration Policy*. Toronto: University of Toronto Press
- Kim JK. 2005. State, Civil Society, and International Norms: Expanding the Political and Labor Rights of Foreigners in South Korea. *Asia and Pacific Migration Journal*. 14(4):383–418
- King R. 1993. *Mass Migrations in Europe: The Legacy and the Future*. London: Belhaven Press
- Klausen S. 2002. *The Uncertain Future of White Supremacy and the Politics of Fertility in South Africa: 1930-1939*. Durban: Univ. of Natal, History Dep.
- Klein HS. 1991. The Social and Economic Integration of Portuguese Immigrants in Brazil in the Late Nineteenth and Twentieth Centuries. *Journal of Latin American Studies*. 23(2):309–337

- Klotz A. 1997. International relations and migration in Southern Africa. *African Security Review*. 6:38–45
- Klotz A. 2000. Migration after Apartheid: Deracialising South African Foreign Policy. *Third World Quarterly*. 21(5):831–847
- Koli KL, Al-Omair M. 1988. Changing Patterns of Migration in Kuwait. *Population bulletin of ESCWA*. (22):
- Komai H. 2000. Immigrants in Japan. *Asia and Pacific Migration Journal*. 9(3):311–326
- Kondo A. 2002. The Development of Immigration Policy in Japan. *Asia and Pacific Migration Journal*. 11(4):415–436
- Koshiro K. 1998. Does Japan Need Immigrants? In *Temporary Workers or Future Citizens? Japanese and U.S. Migration Policies*, pp. 151–176. London: Macmillan Press Ltd
- Ku AS. 2004. Immigration Policies, Discourses, and the Politics of Local Belonging in Hong Kong (1950-1980). *Modern China*. 30(3):326
- Kubát D, Merhländer U, Gehmacher E, eds. 1979. *The Politics of Migration Policies: The First World in the 1970s*. New York: Center for Migration Studies. 1st ed.
- Kuwahara Y. 1998. Japan's Dilemma: Can International Migration be Controlled? In *Temporary Workers or Future Citizens? Japanese and U.S. Migration Policies*, pp. 355–383. London: Macmillan Press Ltd
- La Cava G. 1999. *Italians in Brazil*. New York: Peter Lang Publishing
- Lack J, Templeton J. 1995. *Bold Experiment: A Documentary History of Australian Immigration since 1945*. Melbourne: Oxford University Press
- Lee JS, Wang SW. 1996. Recruiting and managing of foreign workers in Taiwan. *Asian and Pacific Migration Journal*. 5(2–3):281
- Lee TL. 1995. Stateless Persons and the 1989 Comprehensive Plan of Action Part: Chinese Nationality and the Republic of China (Taiwan). *Int'l J. Refugee L*. 7:201
- Lesser J. 1999. *Negotiating National Identity: Immigrants, Minorities, and the Struggle for Ethnicity in Brazil*. Durham, NC: Duke University Press Books
- Libet LV. 1995. *Building the border: The treatment of immigrants in France 1884-1914*. PhD Thesis thesis
- Library of Congress Law Library. 2006. Immigration law sanctions and enforcement in selected foreign countries Brazil, Egypt, Japan, Mexico, Sweden, and Switzerland
- Lincoln D, Mararika C. 2000. Southward Migrants in the Far North: Zimbabwean Farmworkers in Northern Province. In *Borderline Farming: Foreign Migrants in South African Commercial Agriculture*, pp. 40–62. Cape Town: IDASA

- Longva AN. 1997. *Walls Built on Sand: Migration, Exclusion, and Society in Kuwait*. Boulder, CO: Westview Press
- Looney RE. 1988. Manpower problems in a capital-rich country: The case of Saudi Arabia. *Population bulletin of ESCWA*. (32):31
- Lovelock K, Leopold T. 2008. Labour Force Shortages in Rural New Zealand: Temporary Migration and the Recognised Seasonal Employer (RSE) Work Policy. *New Zealand Population Review*. 33(34):213–234
- Lucassen J, Penninx R. 1997. *Newcomers: Immigrants and Their Descendants in the Netherlands; 1550 - 1995*. Amsterdam: Het Spinhuis
- Lucassen L. 2002a. Administrative into social control: The aliens police and foreign female servants in the Netherlands, 1918-40. *Social History*. 27(3):327–342
- Lucassen L. 2002b. Bringing Structure Back In: Economic and Political Determinants of Immigration in Dutch Cities, 1920-1940. *Social Science History*. 26(3):503
- Lucassen L. 2003. Revolutionaries into Beggars: Alien Policies in the Netherlands, 1814-1914. In *Migration Control in the North Atlantic World: The Evolution of State Practices in Europe and the United States from the French Revolution to the Inter-War Period*, pp. 178–94. New York: Berghahn Books
- Luebke FC. 1987. *Germans in Brazil: A Comparative History of Cultural Conflict during World War I*. Baton Rouge, LA: Louisiana State University Press
- Lynch JP, Simon RJ. 2003. *Immigration the World over: Statutes, Policies, and Practices*. Lanham: Rowan & Littlefield Publishers
- Mackey A, Anderson A. 2009. Asylum law: Surrogate protection: Asian perspectives, challenges and contributions. *Asian Society of International Law Second Biennial Conference, Tokyo*
- Madgwick RB. 1969. *Immigration into Eastern Australia, 1788-1851*. Sydney: Sydney University Press
- Marshall B. 2000. *The New Germany and Migration in Europe*. Manchester: Manchester University Press
- Marshall O. 2005. *English, Irish and Irish-American Pioneer Settlers in Nineteenth-Century Brazil*. Oxford: Centre for Brazilian Studies at University of Oxford
- Martens J. 2006. A transnational history of immigration restriction: Natal and New South Wales, 1896-97. *The Journal of Imperial and Commonwealth History*. 34(3):323–344
- Mather C, Mathebula F. 2000. ‘The Farmer Prefers Us’’: Mozambican Farmworkers in the Mpumalanga Lowveld.’ In *Borderline Farming: Foreign Migrants in South African Commercial Agriculture*, pp. 14–39. Cape Town: IDASA

- Mauldon RG, Williams DB. 1990. Price Policy. In *Agriculture in the Australian Economy*. Sydney: Sydney University Press in association with Oxford University Press
- Maurette. 1937. Immigration and settlement in Brazil, Argentina and Uruguay: I. *Int'l Lab. Rev.* 35:215–247
- Mayer KB. 1965. Postwar Migration from Italy to Switzerland. *International Migration Digest.* 2(1):5–13
- McDonald DA. 1998. Hear no housing, see no housing immigration and homelessness in the new South Africa. *Cities.* 15(6):449–462
- McKinnon M. 1996. *Immigrants and Citizens: New Zealanders and Asian Immigration in Historical Context*. Wellington: Institute of Policy Studies, Victoria University of Wellington
- Meade TA. 2009. *A Brief History of Brazil*. New York: Facts On File
- Mendel Jr DH. 1964. Japan's Taiwan Tangle. *Asian Survey.* 1073–1084
- Migration. 1961a. Immigration in Argentina. *Migration.* 1(4):63–64
- Migration. 1961b. New Plan Outlined to Encourage Immigration in South Africa. *Migration.* 1(3):53–54
- Migration. 1961c. New Social Security Law in Brazil. *Migration.* 1(2):75–76
- Migration. 1962. Argentina: Population Census. *Migration.* 2(1):59–64
- Migration Dialogue. 1994a. *Migration News*. Davis, CA: University of California, Davis; German Marshall Fund of the United States, and the University of California - Berkeley Center for German and European Studies
- Migration Dialogue. 1994b. *Migration News*. Davis, CA: University of California, Davis; German Marshall Fund of the United States, and the University of California - Berkeley Center for German and European Studies
- Miller MJ. 1989. Political Participation and Representation of Noncitizens. In *Immigration and the Politics of Citizenship in Europe and North America*. Lanham: University Press of America
- Mills AP. 1930. *The immigration policies of the British dominions, Canada, Australia, New Zealand, South Africa*. PhD Thesis thesis. Stanford University, Department of Economics
- Ministerial Agency of Civil Affairs. 1954. *Saudi Arabian Citizenship System*. Riyadh, Saudi Arabia: Minsitry of Interior, Kingdom of Saudi Arabia
- Misuriello V. 1993. *Politica de La Inmigracion En La Argentina, 1853-1970*. Buenos Aires, Argentina: Ediciones del Gabinete, la Universidad Nacional de Tucuman



- Moore B. 1986. *Refugees from Nazi Germany in the Netherlands, 1933-1940*. Dordrecht: Martinus Nijhoff Publishers
- Morita K, Sassen S. 1994. The new illegal immigration in Japan, 1980-1992. *International Migration Review*. 28(1):153–163
- Morner M, Sims H. 1985. *Adventurers and Proletarians: The Story of Migrants in Latin America*. Pittsburgh, PA: University of Pittsburgh Press
- Morris A, Bouillon A. 2001. *African Immigration to South Africa: Franophone Migration of the 1990s*. Pretoria, South Africa: PROTEA & IFAS
- Morris-Suzuki T. 2010. *Borderline Japan: Foreigners and Frontier Controls in the Postwar Era*. Cambridge: Cambridge University Press
- Moya JC. 1998. *Cousins and Strangers: Spanish Immigrants in Buenos Aires, 1850-1930*. Berkeley: University of California Press
- Nagayama T. 1992. Clandestine migrant workers in Japan. *Asian and Pacific migration journal: APMJ*. 1(3–4):623
- Nagayama T. 1996. Foreign workers recruiting policies in Japan. *Asian and Pacific migration journal: APMJ*. 5(2–3):241
- Nasu H. 2008. Constitutionality of the Japanese Nationality Act: A Commentary on the Supreme Court's Decision on 4 June 2008. *Journal of Japanese Law*. 13(26):101–116
- Neuman GL. 1993. The Lost Century of American Immigration Law (1776-1875). *Columbia Law Review*. 93(8):1833--1901
- Neumark SD. 1957. *Economic Influences on the South African Frontier, 1652-1836*. Stanford, Calif.: Stanford University Press
- Newton RC. 1982. Indifferent Sanctuary: German-Speaking Refugees and Exiles in Argentina, 1933-1945. *Journal of Interamerican Studies and World Affairs*. 24(4):395–420
- Ng SH, Lee GO. 1998. Hong Kong labor market in the aftermath of the crisis: Implications for foreign workers. *Asian and Pacific Migration Journal*. 7:171–186
- Nogueira MB, Marques CC. 2008. Brazil: Ten years of refugee protection. *Forced Migration Review*. 57–58
- O'Connor PS. 1968. Keeping New Zealand White, 1908-1920. *New Zealand Journal of History*. 2(1):41–64
- OECD. 2009. Brazil. In *Latin American Economic Outlook 2010*. Paris: OECD
- O'Malley P. 2011. The O'Malley Archives

- Ongley P, Pearson D. 1995. Post-1945 International Migration: New Zealand, Australia and Canada Compared. *International Migration Review*. 29(3):765–793
- Osborn RF. 1964. *Valiant Harvest: The Founding of the South African Sugar Industry, 1848-1926*. Durban: South African Sugar Association
- Pang EF. 1992. Absorbing temporary foreign workers: The experience of Singapore. *Asian and Pacific Migration Journal*. 1(3–4):495
- Papademetriou DG, Hamilton KA. 1996. *Converging Paths to Restriction: French, Italian, and British Responses to Immigration*. Washington, DC: Carnegie Endowment for International Peace: Brookings Institution [distributor]
- Park KH. 2010a. Korea. *Forced Migration Online*.  
<https://web.archive.org/web/20101007112554/http://forcedmigration.org/browse/regional/korea/>
- Park S. 2010b. Naturalized Koreans Jailed for over 7 years to lose citizenship. *The Korea Times*
- Park Y. 1994. The turning point in international migration and economic development in Korea. *Asian and Pacific Migration Journal*. 3(1):149
- Park Y. 1998. The financial crisis and foreign workers in Korea. *Asian and Pacific Migration Journal*. 7:219–234
- Peberdy S. 2001. Imagining immigration: Inclusive identities and exclusive policies in post-1994 South Africa. *Africa Today*. 48(3):15–32
- Peberdy S. 2009. *Selecting Immigrants: National Identity and South Africa's Immigration Policies, 1910-2008*. Johannesburg, South Africa: Wits University Press
- Pescatello AM. 1970. *Both Ends of the Journey: A Historical Study of Migration and Change in Brazil and Portugal, 1889-1914*. Los Angeles: University of California, Los Angeles
- Peterson G. 2008. To Be or Not to Be a Refugee: The International Politics of the Hong Kong Refugee Crisis, 1949-55. *The Journal of Imperial and Commonwealth History*. 36(2):171–195
- Plender R. 1972. *International Migration Law*. Leiden: Sijthoff
- Prak M. 1997. Burghers into citizens: Urban and national citizenship in the Netherlands during the revolutionary era (c. 1800). *Theory and Society*. 26(4):403–420
- Price CA. 1974. *The Great White Walls Are Built: Restrictive Immigration to North America and Australasia 1836-1888*. Australian Institute of International Affairs in association with Australian National University Press
- PriceWaterhouseCoopers. 2003. The Hong Kong Capital Investment Entrant Scheme

- Prothero RM. 1974. Foreign migrant labour for South Africa. *International Migration Review*. 8(3):383–394
- Randall L. 1977. A comparative economic history of Latin America: 1500-1914; Volume 3: Brazil. Ann Arbor, MI: University Microfilms International
- Rath J. 2009. The Netherlands: A0 reluctant country of immigration. *Tijdschrift voor economische en sociale geografie*. 100(5):674–681
- Refugee Reviw Tribunal of Australia. 2008. *South Korea - Applying for Protection - Asylum Policy*. Work. Pap.
- Reisner R. 1964. National Regulation of the Movement of Workers in the European Community. *The American Journal of Comparative Law*. 13(3):360–384
- Riaño Y, Wastl-Walter D. 2006. Immigration policies, state discourses on foreigners, and the politics of identity in Switzerland. *Environment and Planning A*. 38(9):1693
- Richards A, Martin PL. 1983. The laissez-faire approach to international labor migration: The case of the Arab Middle East. *Economic Development and Cultural Change*. 31(3):455–474
- Rios-Neto ELG. 2005. *Managing Migration: The Brazilian Case*. Work. Pap.
- Roche M. 2005. Empire, Duty and Land: Soldier Settlement in New Zealand 1915-1924. In *(Dis)Placing Empire: Renegotiating British Colonial Geographies*. Burlington, VT: Ashgate Publishing Company
- Rogers R. 1985. *Guests Come to Stay: The Effects of European Labor Migration on Sending and Receiving Countries*. Westview Press
- Roodenburg H, Euwals R, Rele HT. 2003. *Immigration and the Dutch Economy*. The Hague: CPB Netherlands Bureau for Economic Policy Analysis
- Ross R. 1975. The 'White' Population of South Africa in the Eighteenth Century. *Population Studies*. 29(2):217–230
- Russell SS. 1989. Politics and Ideology in Migration Policy Formulation: The Case of Kuwait. *International Migration Review*. 23(1):24–47
- Russell SS, Al-Ramadhan MA. 1994. Kuwait's migration policy since the Gulf crisis. *International Journal of Middle East Studies*. 26(04):569–587
- Sanchez-Albornoz N. 1974. *The Population of Latin America; A History*. Berkeley, CA: University of California Press
- Sanchez-Alonso B. 2000. Those Who Left and Those Who Stayed behind: Explaining Emigration from the Regions of Spain, 1880-1914. *The Journal of Economic History*. 60(3):730–755

- Schain M. 2008. *The Politics of Immigration in France, Britain, and the United States: A Comparative Study*. Palgrave Macmillan
- Scholten S, Minderhoud P. 2008. Regulating Immigration Control: Carrier Sanctions in the Netherlands. *European journal of migration and law*. 10(2):123–147
- Schrover M. 2009. Family in Dutch migration policy 1945-2005. *The History of the Family*. 14(2):191–202
- Schuck PH. 1998. *The Legal Rights of Citizens and Aliens in the United States*. Macmillan Press Ltd
- Scobie JR. 1971. *Argentina: A City and a Nation*. New York: Oxford University Press
- Secombe I, Lawless R. 1987. *Work camps and company towns: settlement patterns and the Gulf oil industry*. Work. Pap., Durham
- Secombe IJ, Lawless RI. 1986. Foreign worker dependence in the Gulf, and the international oil companies: 1910-50. *International Migration Review*. 20(3):548–574
- Selya RM. 1992. Illegal migration in Taiwan: A preliminary overview. *International Migration Review*. 26(3):787–805
- Settlage R. 1997. No Place to Call Home-Stateless Vietnamese Asylum-Seekers in Hong Kong. *Geo. Immigr. LJ*. 12:187
- Shroff G. 1989. New Zealand's Immigration policy. In *New Zealand Official Yearbook 1988-1989*, pp. 193–207. Wellington: Department of Statistics, Government of New Zealand
- Sicsic P, Hatton TJ, Williamson JG. 1994. Foreign Immigration and the French Labor Force, 1896-1926. In *Migration and the International Labor Market, 1850-1939*, pp. 119–138. London: Routledge
- Silva HA. 1998. *Significado de La Presencia Espanola*. Bahia Blanca, Argentina: Universidad Nacional del Sur
- Silvey R. 2008. In the Margins of Riyadh: Indonesian Domestic Workers in Saudi Arabia. In *Migrants to the Metropolis: The Rise of Immigrant Gateway Cities*. Syracuse, NY: Syracuse University Press
- Skeldon R. 1994. Turning points in labor migration: The case of Hong Kong. *Asian and Pacific Migration Journal*. 3(1):93
- Skeldon R. 2006. Recent Trends in Migration in East and Southeast Asia. *Asia and Pacific Migration Journal*. 15(2):277–293
- Smith JP, Edmonston B. 1997. *The New Americans: Economic, Demographic, and Fiscal Effects of Immigration*. National Academies Press
- Smith TE. 1981. *Commonwealth Migration: Flows and Policies*. London: Macmillan Press

- Ltd.
- Smith TL. 1972. *Brazil; People and Institutions*. Baton Rouge, Louisiana State University Press, 4th ed. ed.
- Smith TL, Marchant A. 1951. *Brazil, Portrait of Half a Continent*. Dryden Press
- Solberg CE. 1970. *Immigration and Nationalism, Argentina and Chile, 1890-1914*. Austin, TX: Published for the Institute of Latin American Studies by the University of Texas Press
- Solberg CE, McNeill WH, Adams R. 1978. Mass Migrations in Argentina. In *Human Migration: Patterns and Policies*, pp. 146–170. Bloomington, IN: Indiana University Press
- South African History Online.org. 2011. Grade 12: 1924-1948 Legislation and Segregation
- Spencer IRG. 1997. *British Immigration Policy since 1939: The Making of Multi-Racial Britain*. New York: Routledge
- Sprenger K. 1999. Swiss Law relating to Foreigners 1860-1978. In *Da Und Fort. Leben in Zwei Welten. Interviews, Berichte Und Dokumente Zur Immigration Und Binnenwanderung in Der Schweiz*. Zurich: Limmat Verlag
- Stahl CW. 1986. *International Labor Migration: A Study of the ASEAN Countries*. New York: Center for Migration Studies
- Straubhaar T, Fischer PA. 1994. Economic and Social Aspects of Immigraiton into Switzerland. In *European Migration in the Late Twentieth Century, Historical Patterns, Actual Trends and Social Implications*, pp. 127–148. Aldershot: Edward Elgar Publishing Limited
- Studer B. 2001. Citizenship as Contingent National Belonging: Married Women and Foreigners in Twentieth Century Switzerland. *Gender & History*. 13(3):622–654
- Suzuki N. 2007. Carework and Migration: Japanese Perspectives on the Japan-Philippines Economic Partnership Agreement. *Asia and Pacific Migration Journal*. 16(3):357–382
- Tagupa W. 1994. Law, Status and Citizenship: Conflict and Continuity in New Zealand and Western Samoa (1922-1982). *The Journal of Pacific History*. 29(1):19–35
- Takeda I. 1998. Japan's Responses to Refugees and Political Asylum Seekers. In *Temporary Workers or Future Citizens? Japanese and U.S. Migration Policies*, pp. 431–451. London: Macmillan Press Ltd
- Takenaka A. 2004. The Japanese in Peru: History of Immigration, Settlement, and Racialization. *Latin American Perspectives*. 31(3):77–98
- Tat HW. 1992. Foreign Workers in Singapore: Role of Government, Management, and Unions in Cooperation. In *Present Issues of International Migration: How Can the Sending*

- Country and Receiving Country Cooperate*. Tokyo, Japan: The Japan Institute of Labour
- Teitelbaum MS. 1998. *US Responses to Refugees and Asylum Seekers*. Macmillan Press Ltd
- Templeton F. 2008. *Te Ara-the Encyclopedia of New Zealand*. Wellington: Ministry for Culture and Heritage
- Tigner JL. 1981. Japanese Immigration into Latin America: A Survey. *Journal of Interamerican Studies and World Affairs*. 23(4):457–482
- Timlin MF. 1960. Canada's Immigration Policy, 1896-1910. *The Canadian Journal of Economics and Political Science / Revue canadienne d'Economique et de Science politique*. 26(4):517–532
- Timmer AS, Williamson JG. 1998. Immigration Policy Prior to the 1930s: Labor Markets, Policy Interactions, and Globalization Backlash. *Population and Development Review*. 24(4):739--771
- Tom A. 2006. How Stricter Dutch Immigration Policies are Contributing to Rising Islamic Fundamentalism in the Netherlands and Europe. *Wash. U. Global Stud. L. Rev.* 5:451
- Topik S. 1987. *The Political Economy of the Brazilian State, 1889-1930*. Austin: University of Texas Press
- Tranaes T, Zimmermann KF, eds. 2004. *Migrants, Work, and the Welfare State*. Denmark: University Press of Southern Denmark and the Rockwool Foundatin Research Unit,
- Troper HM. 1972. *Only Farmers Need Apply: Official Canadian Government Encouragement of Immigration from the United States, 1896-1911*. Toronto: Griffin House
- Tsay C, Lin J. 2001. Labor Importation and Unemployment of Local Workers in Taiwan. *Asia and Pacific Migration Journal*. 10(3–4):505–534
- Tsuchida M, Weiner M, Hanami T. 1998. A Histroy of Japanese Emigration from the 1860s to the 1990s. In *Temporary Workers or Future Citizens? Japanese and U.S. Migration Policies*, pp. 77–119. London: Macmillan Press Ltd
- Ulicki T, Crush JS. 2000. Poverty and Women's Migrancy: Lesotho Farmworkers in the Eastern Free State. In *Borderline Farming: Foreign Migrants in South African Commercial Agriculture*, pp. 63–101. Cape Town: IDASA
- Ullah AKM. 2010. *Rationalizing Migration Decisions: Labour Migrants in East and South-East Asia*. Ashgate Pub Co
- UNHCR. 2009. *UNHCR Resettlement Handbook*. Geneva: UNHCR
- UNHCR. 2010. South Korea - Refugee granted citizenship for first time
- UNHCR. 2011. 2011 Regional Operations Profile - East Asia and the Pacific

- U.S. Citizenship and Immigration Services. 2009. Historical Immigration and Naturalization Legislation
- Vagts DF. 1997. Switzerland, International Law and World War II. *The American Journal of International Law*. 91(3):466–475
- Vahed G. 2002. Constructions of Community and Identity among Indians in Colonial Natal, 1860-1910: The Role of the Muharram Festival. *The Journal of African History*. 43(1):77–93
- Vainer CB, Brito F. 2001. Migration and migrants shaping contemporary Brazil. *Anais Do XXIV Iussp General Population Conference*
- van Amersfoort H, Penninx R. 1994. Regulating Migration in Europe: The Dutch Experience, 1960-92. *Annals of the American Academy of Political and Social Science*. 534:133–146
- van Eijl C. 2000. *Immigration policy in the Netherlands, 1849-1914*. Work. Pap.
- van Eijl C. 2008. Tracing back ‘illegal aliens’ in the Netherlands, 1850-1940. In *IMISCOE (International Migration, Integration and Social Cohesion)*, pp. 39–56. Amsterdam: Amsterdam University Press
- van Ours JC, Veenman J. 2005. The Netherlands: Old emigrants-young immigrant country. In *European Migration*. Oxford: Oxford University Press
- van Selm J. 2000. Asylum in the Netherlands: A hazy shade of purple. *Journal of Refugee Studies*. 13(1):74
- Velez WA. 2010. South American Immigration: Argentina
- Villar JM. 1984. Argentine Experience in the Field of Illegal Immigration. *International Migration Review*. 18(3):453–473
- Visit Kuwait. 2011. Passport and Visa Requirements
- Vogel D. 2003. *Einwanderungsland Niederlande: Politik Und Kultur*. Frankfurt am Main: IKO
- Vos J. 1994. Illegal Migrants in the Dutch Labour Market. In *Immigrant Ethnic Minorities in the Dutch Labour Market: Analysis and Policies*. Amsterdam: Thesis Publishers, pp. 93–114. Amsterdam: Thesis Publishers
- Vuilleumier M. 1992. *Immigrants and Refugees in Switzerland: An Outline History*. Zurich: Pro Helvetia
- Walvin J. 1984. *Passage to Britain: Immigration in British History and Politics*. Harmondsworth: Penguin in association with Belitha Press
- Wanner P, Efonyai D, Fibbi R. 2009. Switzerland. In *Statistics and Reality: Concepts and*

- Measurements of Migration in Europe*, pp. 151–166. Amsterdam: Amsterdam University Press
- Watanabe S. 1998. The economic crisis and migrant workers in Japan. *Asian and Pacific Migration Journal*. 7:235–254
- Wearing B. 1990. *Immigration Law in New Zealand and the USA: A Comparison of Recent Changes in New Zealand's Immigration Law with Those Made in the USA*. Work. Pap., Los Angeles
- Wearing B. 1993. New Zealand's Immigration Policies and Immigration Act (1987): Comparisons with the United States of America. In *Immigration and Entrepreneurship: Culture, Capital, and Ethnic Networks*. New Brunswick: Transaction Publishers
- Weil P. 2001. Access to citizenship: A comparison of twenty-five nationality laws. *Citizenship today: Global perspectives and practices*. 17–35
- Weiner M. 1982. International migration and development: Indians in the Persian Gulf. *Population and Development Review*. 8(1):1–36
- Weiner M. 1998. *Opposing Visions: Migration and Citizenship Policies in Japan and the United States*. MacMillan Press Ltd
- Weiner M. 2000. Japan in the age of migration. In *Japan and Global Migration*, pp. 52–69. London: Routledge
- Weiner M, Hanami T. 1998. Opposing Visions: Migration and Citizenship Policies in Japan and the United States. In *Temporary Workers or Future Citizens? Japanese and U.S. Migration Policies*. London: MacMillan Press Ltd
- Wentzel M. 2003. Historical and Contemporary Dimensions of Migration between South Africa and its Neighboring Countries. *HSRC Migration Workshop*
- Wentzel M, Tlabela K. 2006. Historical background to South African migration. In *Migration in South and Southern Africa: Dynamics and Determinants*, pp. 71–96. Cape Town: Human Sciences Research Council
- Whelpley JD. 1905. *The Problem of the Immigrant*. London: Chapman & Hall
- Whitman J. 2000. *Migrants, Citizens, and the State in Southern Africa*. New York: St. Martin's Press, Inc.
- Wilson F. 1972a. *Labour in the South African Gold Mines 1911-1969*. Cambridge: Cambridge University Press
- Wilson F. 1972b. *Migrant Labour: Report to the South African Council of Churches*. Johannesburg: South African Council of Churches and SPRO-CAS
- Wilson F. 1976. International Migration in Southern Africa. *International Migration Review*.



10(4):451–488

- Winckler O. 1997. The immigration policy of the Gulf Cooperation Council (GCC) states. *Middle Eastern Studies*. 33(3):480–493
- Winkelmann R. 1999. *Immigration: The New Zealand Experience*. Work. Pap., Bonn
- Winkelmann R. 2000. Immigration Policies and their Impact: The Case of New Zealand and Australia. IZA, Bonn
- Wong D. 1996. Foreign Domestic Workers in Singapore. *Asia and Pacific Migration Journal*. 5(1):117–138
- Wong D. 1997. Transience and Settlement: Singapore's Foreign Labor Policy. *Asia and Pacific Migration Journal*. 6(2):135–167
- Woodward PN. 1988. *Oil and Labor in the Middle East: Saudi Arabia and the Oil Boom*. New York: Praeger
- Wu C, Inglis C. 1992. Illegal immigration to Hong Kong. *Asian and Pacific Migration Journal*. 1(3–4):601
- Yamashita S. 2008. *Transnational Migration in East Asia: Japan in a Comparative Focus*. Osaka: National Museum of Ethnology
- Yamawaki K. 2000. Foreign Workers in Japan: A historical perspective. In *Japan and Global Migration*, pp. 38–52. London: Routledge
- Yeoh B. 2004. *Migration, international labour and multicultural policies in Singapore*. Work. Pap.
- Young GF. 1974. *The Germans in Chile: Immigration and Colonization, 1849-1914*. New York: Center for Migration Studies
- Zha D. 2002. Chinese Migrant Workers in Japan: Policies, Institutions and Civil Society. In *Globalizing Chinese Migration: Trends in Europe and Asia*, pp. 129–157. Burlington, VT: Ashgate Publishing Company
- Zolberg AR. 2006. *A Nation by Design: Immigration Policy in the Fashioning of America*. Harvard University Press
- Zolberg AR, McNeill WH, Adams R. 1978. International Migration Policies in a Changing World System. In *Human Migration: Patterns and Policies*, pp. 241–286. Bloomington, IN: Indiana University Press
- Zorlu A, Hartog J. 2002. Migration and immigrants: The case of The Netherlands. *Studies and Comments*. 119

## Sources used by Shin

- Arnold, Peri E. 2010. *National Approaches to the Administration of International Migration*. IOS Press.
- Asylum in Europe. N.d. "Sweden: Country Report." Asylum in Europe.  
**URL:** <http://www.asylumineurope.org/reports/country/sweden>
- Barrett, Alan, Corona Joyce and Bertrand Maitre. 2011. "Immigrants and Welfare Receipt in Ireland." *IZA* (5516):1–17.
- Bauboek, R. and H. Wimmer. 1988. "Social Partnership and Foreigners Policy: On Special Features of Austria's Guest Worker System." *European Journal of Political Research* 16(4):659–681.
- Becker, P. 2010. "Governance of Migration in the Habsburg Monarchy and the Republic of Austria." *International Institute of Administrative Sciences Monographs* 31:32–52.
- Bernitz, Hedvig. 2012. "Country Report: Sweden." *European Citizenship Observatory* .
- Beyeler, Michelle, Henrik Christoffersen, Martin Paldam and Reiner Eichenberger. 2014. *The Good Society: A Comparative Study of Denmark and Switzerland*. Springer.
- Bogdan, Michael. 2006. Refugees in Swedish Private International Law. In *Human Rights Law: From Dissemination to Application*, ed. Jonas Grimheden and Rolf Ring. Brill.
- Botswana E-Laws. 1991. "Dow v. Attorney-General 1991 BLR 233 HR." Botswana E-Laws.  
**URL:** <http://citizenshiprightsafrika.org/wp-content/uploads/2016/07/Dow-vs-AG-HCt.pdf>
- Brochmann, Grete. 2010. "Country report: Norway." *European University Institute* .
- Bryson, Molly and Garner, Kimberly and Vesth Rasmussen, Sorine. N.d. "Politics of Exclusion: Xenophobia and the Danish Expulsion Law." Humanity in Action.  
<https://web.archive.org/web/20160329151515/http://www.humanityinaction.org:80/knowledgebase/382-politics-of-exclusion-xenophobia-and-the-danish-expulsion-law>
- Diaz, Morales and Navarro Perez. 2008. "Venezuela: de receptor de inmigrantes a emisor de emigrantes." *Universidad Catolica Andres Bello* .
- Eurofound. 2011. "New Criteria-based Immigration System to Attract Skilled Workers." Eurofound.  
**URL:** <https://www.eurofound.europa.eu/publications/article/2011/new-criteria-based-immigration-system-to-attract-skilled-workers>
- European Migration Network. 2008. "Annual Policy Report 2008." European Migration Network.
- European Resettlement Network. N.d. "Norway." European Resettlement Network.  
**URL:** [https://web.archive.org/web/20170901000000\\*/http://www.resettlement.eu/country/norway](https://web.archive.org/web/20170901000000*/http://www.resettlement.eu/country/norway)
- Focus Migration. N.d. "Ireland: Background Information." Focus Migration.  
**URL:** <https://web.archive.org/web/20200531210657/http://focus-migration.hwwi.de/Ireland.6269.0.html?&L=1>

- Groenendijk, Kees, Elspeth Guild and Halil Dogan. 1998. "Security of Residence of Long Term Migrants: A Comparative Study of Law and Practice in European Countries."
- Gudrun Jensen, Tina, Garbi Schmidt, Mette Kirstine Torslev, Kathrine Vitus and Kristina Weibel. N.d. "Analysis of Integration Policies and Public State-Endorsed Institutions at National and Regional Levels in Denmark." *The Danish Centre for Social Research*. Forthcoming.
- Hayduk, Ron. N.d. "Immigrant Voting Rights in Belgium."
- Hernes, Helga. 1988. "Scandinavian Citizenship." *Acta Sociologica* .
- Hurwitz, Agnes. 2003. "The Land Beyond: Collected Essays on Refugee Law and Policy." *Journal of Refugee Studies* 16(1):99–100.
- International Labour Organization. 1975. "Employment of Foreigners Act." International Labour Organization.  
**URL:** [https://www.ilo.org/dyn/natlex/natlex4.detail?p\\_isn=42816&p\\_lang=en](https://www.ilo.org/dyn/natlex/natlex4.detail?p_isn=42816&p_lang=en)
- International Labour Organization. N.d. "Database of National Labour, Social Security, and Related Human Rights Legislation." International Labour Organization.
- Jandl, Michael, Christina Hollomey, Sandra Gendera and Anna Stepien. 2008. *Migration and Irregular Work in Austria: A Case Study of the Structure and Dynamics of Irregular Foreign Employment in Europe at the Beginning of the 21st Century*. University of Chicago Press.
- King, R. 1995. European International Migration 1945-1990: A Statistical and Geographical Overview. In *Mass Migration in Europe: The Legacy and the Future*, ed. R. King. New York: John Wiley and Sons pp. 19–39.
- Lefko-Everett, Kate. 2004. "Botswana's Changing Migration Patterns." Migration Policy.  
**URL:** <https://www.migrationpolicy.org/article/botswanas-changing-migration-patterns>
- Legislation Online. N.d. "Migration: Denmark." Legislation Online. **URL:** [https://legislationline.org/search?q=lang%3Aen%2Csort%3Amost\\_read\\_first%2Ctopics%3A137%2Ccountry%3A107%2Cpage%3A1](https://legislationline.org/search?q=lang%3Aen%2Csort%3Amost_read_first%2Ctopics%3A137%2Ccountry%3A107%2Cpage%3A1)
- Library of Congress. N.d. "Denmark." Library of Congress.  
**URL:** <https://guides.loc.gov/law-denmark>
- Liebig, Thomas. 2007. "The Labour Market Integration of Immigrants in Denmark." *OECD Social, Employment, and Migration Working Papers* pp. 1–78.
- Manby, Bronwen. 2016. "Citizenship Law in Africa: A Comparative Study." *Open Society Foundations*.
- Mechanisms of Immigration Control: A Comparative Analysis of European Regulation Policies*. 1999. Berg Publishers.
- Migrant Integration Policy Index. N.d. "Norway." MIPEX.  
**URL:** <http://www.mipex.eu/norway>

- Ministerio del Interior y Seguridad Publica. 2013. "Protocolo de Actuacion Para Expulsion de Extranjeros Infractores." Chile Biblioteca.
- MPI. N.d. "Belgium's Immigration Policy brings Renewals and Challenges."
- Nannestad, Peter. 2004. "Immigration as a Challenge to the Danish Welfare State?" *European Journal of Political Economy* 20(3):755–767.
- Nanyenya Takirambudde, Peter. N.d. "A Note on the 1982 Botswana Citizenship Act." *African e-Journals Project*. Forthcoming.
- Ostby, Lars. 2013. "Norway's Population Groups of Developing Countries' Origin: Change and Integration." *Rapporter Reports* .
- Pearson, Tamara. 2012. "Immigration to Venezuela Double that of Emigration." Venezuela Analysis.  
**URL:** <https://venezuelanalysis.com/news/6999>
- Reaching a State of Hope: Refugees, Immigrants and the Swedish Welfare State, 1930-2000.* 2013. Nordic Academic Press.
- Reyes, Damaso. 2010. "Living in the Shadows: Navigating Austria's Evolving Asylum Policy." *World Policy* 27(4):87–95.
- Roemer, John E., Lee Woojin and Karine Van der Straeten. 2007. *Racism, Xenophobia, and Distribution: Multi-Issue Politics in Advanced Democracies*. Harvard University Press.
- Security of Residence and Expulsion Protection of Aliens in Europe.* 2001. Kluwer Law International.
- Staver, Anne. 2014. From Right to Earned Privilege? The Development of Stricter Family Immigration Rules in Denmark, Norway and the United Kingdom PhD thesis University of Toronto.
- Thorburn, Joanne. 1996. "International Journal on Minority and Group Rights." *International Journal on Minority and Group Rights* 4(1):87–90.
- Triandafyllidou, Anna and Ruby Gropas. 2014. *European Immigration: A Sourcebook*. Farnham: Ashgate.
- UNHCR. N.d. "States Parties to the 1951 Convention Relating to the Status of Refugees and the 1967 Protocol." **URL:**  
<https://web.archive.org/web/20151218161219/https://www.unhcr.org/protect/PROTECTION/3b73b0d63.pdf>
- Van Jonsson, Heidi and Klaus Petersen. 2012. Denmark: A National Welfare State Meets the World. In *Immigration Policy and the Scandinavian Welfare State*, ed. Grete Brochmann. The name of the publisher pp. 97–148.
- Wadensjo, Eskil. 2000. "Immigration, the Labour Market, and Public Finances in Denmark." *Swedish Economic Policy Review* pp. 59–83.
